# Supplementary material
Source: PubMed Central journal article supplement (PMC6314014)
Supplement: NIHMS999248-supplement-Supp_Table_1.pdf [file NIHMS999248-supplement-Supp_Table_1.pdf]

Supplemental Table 1. Hepatic transcripts differentially regulated by high fat diet ( $Q < 0.05$ ,  $n = 24$  microarrays). Livers were collected from randomly selected PyMT negative, non-tumor bearing- F2 female sib-pairs fed opposing diets ( $n = 12$  mice fed HFD,  $n = 12$  mice fed MCD). Annotation was performed with Ingenuity Pathway Analysis Knowledge Base.

\*Positive fold change is significant fold change increase in high fat diet relative to matched control diet. Negative fold change is significant fold change increase in matched control diet relative to high fat diet.

†Identification of transcript by RefSeq or Illumina probe ID where RefSeq was not available.

‡Highlights significant transcripts that appear in duplicate due to the redundancy of transcript representation on Illumina Bead Chips.

§Official symbolic name of transcript

||Official descriptive name of transcript

|    | A            | B           | C      | D             | E                                                                                      |
|----|--------------|-------------|--------|---------------|----------------------------------------------------------------------------------------|
| 1  | Fold Change* | ID†         | Notes‡ | Molecules§    | Description                                                                            |
| 2  | 1.218        | 68464       |        | 1110004M10RIK | RIKEN cDNA 1110004M10 gene                                                             |
| 3  | -0.683       | NM_026947.2 |        | 1810022C23RIK | RIKEN cDNA 1810022C23 gene                                                             |
| 4  | 1.294        | 329406      |        | 5230400M03RIK | RIKEN cDNA 5230400M03 gene                                                             |
| 5  | 1.346        | AK052127    |        | 5830411K21RIK | RIKEN cDNA 5830411K21 gene                                                             |
| 6  | 1.437        | 77339       |        | 9430051O21RIK | RIKEN cDNA 9430051O21 gene                                                             |
| 7  | 1.184        | NM_177159   |        | 9530091C08RIK | RIKEN cDNA 9530091C08 gene                                                             |
| 8  | -0.555       | NM_030210.1 |        | AACS          | acetoacetyl-CoA synthetase                                                             |
| 9  | 1.526        | XM_358306.1 |        | ABCC3         | ATP-binding cassette, sub-family C (CFTR/MRP), member 3                                |
| 10 | -0.554       | NM_133904   |        | ACACB         | acetyl-Coenzyme A carboxylase beta                                                     |
| 11 | -0.816       | NM_025988.1 |        | ACBD4         | acyl-Coenzyme A binding domain containing 4                                            |
| 12 | 1.179        | NM_178758.2 |        | ACSM5         | acyl-CoA synthetase medium-chain family member 5                                       |
| 13 | -0.512       | NM_019811.2 |        | ACSS2         | acyl-CoA synthetase short-chain family member 2                                        |
| 14 | -0.826       | NM_028717.2 |        | ALS2          | amyotrophic lateral sclerosis 2 (juvenile)                                             |
| 15 | -0.838       | NM_027799.1 |        | ANKRD40       | ankyrin repeat domain 40                                                               |
| 16 | 1.469        | XM_128064.4 |        | APOL9A        | apolipoprotein L 9a                                                                    |
| 17 | 1.521        | NM_173743.2 |        | APOL9B        | apolipoprotein L 9b                                                                    |
| 18 | -0.784       | NM_175105.2 |        | AQP11         | aquaporin 11                                                                           |
| 19 | -0.911       | NM_146045.1 |        | B4GALT7       | xylosylprotein beta 1,4-galactosyltransferase, polypeptide 7 (galactosyltransferase I) |
| 20 | 1.168        | BC002245    |        | BC002245      | cDNA sequence BC002245                                                                 |
| 21 | -0.745       | NM_018772.1 |        | BRI3          | brain protein I3                                                                       |
| 22 | 1.189        | AK049694    |        | C10ORF97      | chromosome 10 open reading frame 97                                                    |
| 23 | -0.886       | 329478      |        | C130078N14    | hypothetical protein C130078N14                                                        |
| 24 | -0.865       | XM_133786.5 |        | C16ORF52      | chromosome 16 open reading frame 52                                                    |
| 25 | -0.676       | NM_153577.1 |        | C19ORF46      | chromosome 19 open reading frame 46                                                    |
| 26 | -0.825       | NM_029021.1 |        | C20ORF123     | chromosome 20 open reading frame 123                                                   |
| 27 | 1.663        | NM_009780.1 |        | C4B           | complement component 4B (Chido blood group)                                            |
| 28 | 1.219        | XM_128587.4 |        | C6ORF106      | chromosome 6 open reading frame 106                                                    |
| 29 | -0.776       | NM_009801.3 |        | CA2           | carbonic anhydrase II                                                                  |
| 30 | -0.838       | XM_355539.1 |        | CAMTA1        | calmodulin binding transcription activator 1                                           |
| 31 | 1.188        | XM_147426.3 |        | CCDC131       | coiled-coil domain containing 131                                                      |
| 32 | 1.265        | AK013634    |        | CCNT2         | cyclin T2                                                                              |
| 33 | -0.808       | NM_145822.1 |        | CD3EAP        | CD3e molecule, epsilon associated protein                                              |
| 34 | -0.760       | NM_007657.2 |        | CD9           | CD9 molecule                                                                           |
| 35 | -0.854       | NM_025584.1 |        | CD99          | CD99 antigen                                                                           |
| 36 | -0.790       | NM_007543.2 |        | CEACAM21      | carcinoembryonic antigen-related cell adhesion molecule 21                             |
| 37 | 1.261        | NM_025639.2 | D      | CENPM         | centromere protein M                                                                   |
| 38 | 1.282        | NM_178269.1 | D      | CENPM         | centromere protein M                                                                   |
| 39 | 1.516        | XM_356125.1 |        | CES3          | carboxylesterase 3 (brain)                                                             |
| 40 | 1.194        | 76499       |        | CLASP2        | cytoplasmic linker associated protein 2                                                |
| 41 | -0.820       | NM_171826   |        | CLDND1        | claudin domain containing 1                                                            |
| 42 | 1.384        | NM_016751.2 |        | CLEC4F        | C-type lectin domain family 4, member F                                                |

|    | A            | B           | C      | D                  | E                                                                                         |
|----|--------------|-------------|--------|--------------------|-------------------------------------------------------------------------------------------|
| 1  | Fold Change* | ID†         | Notes‡ | Molecules§         | Description                                                                               |
| 43 | -0.782       | NM_009944.2 |        | COX7A1             | cytochrome c oxidase subunit VIIa polypeptide 1 (muscle)                                  |
| 44 | 1.191        | AK020013    |        | CTNNB1             | catenin (cadherin-associated protein), beta 1, 88kDa                                      |
| 45 | -0.693       | NM_029787.2 | D      | CYB5R3             | cytochrome b5 reductase 3                                                                 |
| 46 | -0.776       | NM_029787.2 | D      | CYB5R3             | cytochrome b5 reductase 3                                                                 |
| 47 | 1.487        | NM_009993.2 |        | CYP1A2             | cytochrome P450, family 1, subfamily A, polypeptide 2                                     |
| 48 | -0.859       | XM_129747.4 |        | CYP20A1            | cytochrome P450, family 20, subfamily A, polypeptide 1                                    |
| 49 | 1.757        | NM_007813.1 |        | CYP2B13            | cytochrome P450, family 2, subfamily b, polypeptide 13                                    |
| 50 | 1.218        | NM_010000.1 |        | CYP2B9             | cytochrome P450, family 2, subfamily b, polypeptide 9                                     |
| 51 | 1.445        | NM_010001.1 |        | CYP2C37            | cytochrome P450, family 2, subfamily c, polypeptide 37                                    |
| 52 | 1.749        | NM_134144.1 |        | CYP2C50            | cytochrome P450, family 2, subfamily c, polypeptide 50                                    |
| 53 | 2.059        | NM_206537.1 |        | CYP2C54            | cytochrome P450, family 2, subfamily c, polypeptide 54                                    |
| 54 | -0.588       | XM_283309.2 |        | CYP2D40            | cytochrome P450, family 2, subfamily d, polypeptide 40                                    |
| 55 | 1.261        | NM_026819.2 |        | DHRS1              | dehydrogenase/reductase (SDR family) member 1                                             |
| 56 | -0.837       | XM_135485   |        | DHRSX              | dehydrogenase/reductase (SDR family) X-linked                                             |
| 57 | -0.787       | NM_145614.2 |        | DLAT               | dihydrolipoamide S-acetyltransferase                                                      |
| 58 | 1.604        | NM_181680   |        | DSG1C              | desmoglein 1 gamma                                                                        |
| 59 | -0.888       | XM_127250.4 |        | E2F3               | E2F transcription factor 3                                                                |
| 60 | -0.859       | NM_025344   |        | EIF3F              | eukaryotic translation initiation factor 3, subunit F                                     |
| 61 | -0.862       | NM_023314.2 |        | EIF4E2             | eukaryotic translation initiation factor 4E family member 2                               |
| 62 | -0.245       | NM_130450.1 |        | ELOVL6             | ELOVL family member 6, elongation of long chain fatty acids (FEN1/Elo2, SUR4/Elo3-east)   |
| 63 | 1.139        | AK088491.1  |        | ENPP2              | ectonucleotide pyrophosphatase/phosphodiesterase 2 (autotaxin)                            |
| 64 | 1.299        | AK046967    |        | ENSMUSG00000063087 | predicted gene, ENSMUSG000000063087                                                       |
| 65 | -0.548       | NM_010634.1 |        | FABP5L2            | fatty acid binding protein 5-like 2                                                       |
| 66 | 1.633        | NM_183278.1 |        | FAM25A             | family with sequence similarity 25, member A                                              |
| 67 | 1.230        | NM_133858.2 |        | FAM63A             | family with sequence similarity 63, member A                                              |
| 68 | -0.665       | NM_020013.2 |        | FGF21              | fibroblast growth factor 21                                                               |
| 69 | 1.296        | NM_010236.1 |        | FPGS               | folylpolyglutamate synthase                                                               |
| 70 | -0.630       | NM_008062.1 |        | G6PD               | glucose-6-phosphate dehydrogenase                                                         |
| 71 | -0.771       | NM_008064.2 |        | GAA                | glucosidase, alpha; acid (Pompe disease, glycogen storage disease type II)                |
| 72 | -0.845       | NM_139272.2 |        | GALNT2             | UDP-N-acetyl-alpha-D-galactosamine:polypeptide N-acetylgalactosaminyltransferase (NAc-T2) |
| 73 | -0.692       | NM_145741.2 |        | GDF10              | growth differentiation factor 10                                                          |
| 74 | -0.721       | NM_011819.1 |        | GDF15              | growth differentiation factor 15                                                          |
| 75 | 1.205        | AK089856    |        | GOLGA7             | golgi autoantigen, golgin subfamily a, 7                                                  |
| 76 | 1.491        | NM_016696.1 |        | GPC1               | glypican 1                                                                                |
| 77 | -0.774       | NM_010274.2 |        | GPD2               | glycerol-3-phosphate dehydrogenase 2 (mitochondrial)                                      |
| 78 | -0.668       | NM_008155.1 |        | GPI                | glucose phosphate isomerase                                                               |
| 79 | -0.873       | NM_016886.1 |        | GRIA3              | glutamate receptor, ionotropic, AMPA 3                                                    |
| 80 | 1.246        | AK037997    |        | GRIPAP1            | GRIP1 associated protein 1                                                                |

|     | A            | B              | C      | D            | E                                                                                                                        |
|-----|--------------|----------------|--------|--------------|--------------------------------------------------------------------------------------------------------------------------|
| 1   | Fold Change* | ID†            | Notes‡ | Molecules§   | Description                                                                                                              |
| 81  | -0.753       | NM_021296      |        | GRPEL2       | GrpE-like 2, mitochondrial (E. coli)                                                                                     |
| 82  | 2.553        | NM_029555      |        | GSTK1        | glutathione S-transferase kappa 1                                                                                        |
| 83  | 1.291        | NM_178747.2    |        | GULO         | gulonolactone (L-) oxidase                                                                                               |
| 84  | -0.833       | NM_020586.1    |        | HERPUD2      | HERPUD family member 2                                                                                                   |
| 85  | -0.747       | NM_008235.2    |        | HES1         | hairy and enhancer of split 1, (Drosophila)                                                                              |
| 86  | -0.862       | NM_178922.2    |        | HIC2         | hypermethylated in cancer 2                                                                                              |
| 87  | 1.499        | NM_001012306.1 |        | HSD3B3       | hydroxy-delta-5-steroid dehydrogenase, 3 beta- and steroid delta-isomerase 3                                             |
| 88  | 1.195        | NM_012057.1    |        | IRF5         | interferon regulatory factor 5                                                                                           |
| 89  | -0.832       | NM_019715.1    |        | KCMF1        | potassium channel modulatory factor 1                                                                                    |
| 90  | -0.735       | XM_203753.2    |        | KDSR         | 3-ketodihydrosphingosine reductase                                                                                       |
| 91  | 1.240        | NM_172615.1    |        | KIAA0226     | KIAA0226                                                                                                                 |
| 92  | -0.651       | NM_010915.1    |        | KLK1B4       | kallikrein 1-related peptidase b4                                                                                        |
| 93  | 1.149        | NM_008455      |        | KLKB1        | kallikrein B, plasma (Fletcher factor) 1                                                                                 |
| 94  | 1.253        | AK042286       |        | LINGO4       | leucine rich repeat and Ig domain containing 4                                                                           |
| 95  | 1.342        | NM_008502.1    |        | LLGL1        | lethal giant larvae homolog 1 (Drosophila)                                                                               |
| 96  | -0.855       | NM_026506.1    |        | LOC100130932 | similar to Sm protein G                                                                                                  |
| 97  | -0.830       | NM_027733.2    |        | LOC202051    | hypothetical protein LOC202051                                                                                           |
| 98  | -0.643       | XM_885191.2    |        | LOC440498    | hypothetical gene supported by AK001829                                                                                  |
| 99  | -0.845       | NM_174992.2    |        | LOC57228     | small trans-membrane and glycosylated protein                                                                            |
| 100 | 1.282        | XM_128721.2    |        | LONP1        | lon peptidase 1, mitochondrial                                                                                           |
| 101 | 1.164        | AK045341       |        | LPP          | LIM domain containing preferred translocation partner in lipoma                                                          |
| 102 | -0.819       | NM_013587.1    |        | LRPAP1       | low density lipoprotein receptor-related protein associated protein 1                                                    |
| 103 | -0.448       | NM_198119.1    |        | LRRC24       | leucine rich repeat containing 24                                                                                        |
| 104 | -0.708       | NM_175124.3    |        | LRRC28       | leucine rich repeat containing 28                                                                                        |
| 105 | 1.151        | NM_138680.1    |        | LUC7L2       | LUC7-like 2 (S. cerevisiae)                                                                                              |
| 106 | -0.793       | NM_011844.3    |        | MGLL         | monoglyceride lipase                                                                                                     |
| 107 | -0.813       | NM_010798.1    |        | MIF          | macrophage migration inhibitory factor (glycosylation-inhibiting factor)                                                 |
| 108 | 1.902        | NM_008645.2    | D      | MUG1         | murinoglobulin 1                                                                                                         |
| 109 | 1.391        | NM_008645      | D      | MUG1         | murinoglobulin 1                                                                                                         |
| 110 | 1.257        | NM_139300      |        | MYLK         | myosin light chain kinase                                                                                                |
| 111 | -0.767       | NM_026703.1    |        | NDUFA8       | NADH dehydrogenase (ubiquinone) 1 alpha subcomplex, 8, 19kDa                                                             |
| 112 | 1.290        | AK034793       |        | NFIB         | nuclear factor I/B                                                                                                       |
| 113 | 1.444        | AK006371       |        | NNMT         | nicotinamide N-methyltransferase                                                                                         |
| 114 | 1.389        | AK088505.1     |        | OGT          | O-linked N-acetylglucosamine (GlcNAc) transferase (UDP-N-acetylglucosamine:polypeptide-N-acetylglucosaminyl transferase) |
| 115 | -0.704       | NM_011014.1    |        | OPRS1        | opioid receptor, sigma 1                                                                                                 |
| 116 | -0.761       | NM_008773.2    |        | P2RY2        | purinergic receptor P2Y, G-protein coupled, 2                                                                            |
| 117 | -0.799       | NM_148917.1    |        | PABPC4       | poly(A) binding protein, cytoplasmic 4 (inducible form)                                                                  |
| 118 | -0.761       | NM_008810.2    |        | PDHA1        | pyruvate dehydrogenase (lipoamide) alpha 1                                                                               |
| 119 | -0.678       | NM_013743.1    |        | PDK4         | pyruvate dehydrogenase kinase, isozyme 4                                                                                 |
| 120 | -0.869       | NM_026131.2    |        | PDLIM7       | PDZ and LIM domain 7 (enigma)                                                                                            |

|     | A            | B           | C      | D          | E                                                                                                    |
|-----|--------------|-------------|--------|------------|------------------------------------------------------------------------------------------------------|
| 1   | Fold Change* | ID†         | Notes‡ | Molecules§ | Description                                                                                          |
| 121 | -0.463       | NM_026018.1 |        | PDZK1IP1   | PDZK1 interacting protein 1                                                                          |
| 122 | -0.802       | AK014543    |        | PGRMC2     | progesterone receptor membrane component 2                                                           |
| 123 | 1.268        | NM_008835.1 |        | PHXR4      | per-hexamer repeat gene 4                                                                            |
| 124 | -0.850       | NM_019640.2 |        | PITPNB     | phosphatidylinositol transfer protein, beta                                                          |
| 125 | -0.739       | NM_011125.1 |        | PLTP       | phospholipid transfer protein                                                                        |
| 126 | 1.165        | NM_172775.1 |        | PLXNB1     | plexin B1                                                                                            |
| 127 | -0.795       | NM_025928.1 |        | PMF1       | polyamine-modulated factor 1                                                                         |
| 128 | -0.797       | NM_027241.1 |        | POLR3GL    | polymerase (RNA) III (DNA directed) polypeptide G (32kD)-like                                        |
| 129 | 1.181        | XM_889570.2 |        | POU5F2     | POU domain class 5, transcription factor 2                                                           |
| 130 | -0.820       | NM_133819   |        | PPP1R15B   | protein phosphatase 1, regulatory (inhibitor) subunit 15B                                            |
| 131 | -0.862       | NM_017374.2 |        | PPP2CB     | protein phosphatase 2 (formerly 2A), catalytic subunit, beta isoform                                 |
| 132 | 1.227        | NM_029239.2 |        | PRKD3      | protein kinase D3                                                                                    |
| 133 | 1.436        | NM_178047.2 |        | PROM2      | prominin 2                                                                                           |
| 134 | 1.187        | AK019450    |        | PTPRB      | protein tyrosine phosphatase, receptor type, B                                                       |
| 135 | -0.730       | NM_008990.2 |        | PVRL2      | poliovirus receptor-related 2 (herpesvirus entry mediator B)                                         |
| 136 | -0.850       | NM_198163.1 |        | RAB35      | RAB35, member RAS oncogene family                                                                    |
| 137 | -0.799       | NM_009010.2 |        | RAD23A     | RAD23 homolog A (S. cerevisiae)                                                                      |
| 138 | -0.614       | NM_207649.1 |        | RCAN2      | regulator of calcineurin 2                                                                           |
| 139 | -0.618       | NM_009040.1 |        | RDH16      | retinol dehydrogenase 16                                                                             |
| 140 | 1.100        | AK020104    |        | RNF170     | ring finger protein 170                                                                              |
| 141 | 1.698        | XM_133272   |        | RNF170     | ring finger protein 170                                                                              |
| 142 | -0.718       | NM_025786.1 |        | RNF186     | ring finger protein 186                                                                              |
| 143 | -0.802       | NM_134064.1 |        | RNF44      | ring finger protein 44                                                                               |
| 144 | -0.533       | NM_009127.2 |        | SCD        | stearoyl-CoA desaturase (delta-9-desaturase)                                                         |
| 145 | 1.299        | NM_146013.1 |        | SEC14L4    | SEC14-like 4 (S. cerevisiae)                                                                         |
| 146 | -0.798       | XM_131192.5 |        | SEC24B     | SEC24 related gene family, member B (S. cerevisiae)                                                  |
| 147 | -0.399       | NM_177920.4 | D      | SERPINA7   | serpin peptidase inhibitor, clade A (alpha-1 antitrypsin, antitrypsin), member 7                     |
| 148 | -0.670       | NM_177920   | D      | SERPINA7   | serpin peptidase inhibitor, clade A (alpha-1 antitrypsin, antitrypsin), member 7                     |
| 149 | 1.125        | NM_018877.1 |        | SETDB1     | SET domain, bifurcated 1                                                                             |
| 150 | -0.801       | NM_009172.1 |        | SIAH1      | seven in absentia homolog 1 (Drosophila)                                                             |
| 151 | -0.762       | NM_022411.1 |        | SLC13A2    | solute carrier family 13 (sodium-dependent dicarboxylate transporter), member 2                      |
| 152 | 1.211        | NM_054055.1 |        | SLC13A3    | solute carrier family 13 (sodium-dependent dicarboxylate transporter), member 3                      |
| 153 | -0.860       | NM_007451.2 |        | SLC25A5    | solute carrier family 25 (mitochondrial carrier; adenine nucleotide translocator), member 5          |
| 154 | 1.211        | NM_177732.2 |        | SLC35D1    | solute carrier family 35 (UDP-glucuronic acid/UDP-N-acetylgalactosamine dual transporter), member D1 |
| 155 | -0.859       | NM_019810.2 |        | SLC5A1     | solute carrier family 5 (sodium/glucose cotransporter), member 1                                     |
| 156 | -0.805       | NM_022316.1 |        | SMOC1      | SPARC related modular calcium binding 1                                                              |
| 157 | -0.861       | NM_009225.1 |        | SNRPB      | small nuclear ribonucleoprotein polypeptides B and B1                                                |
| 158 | 1.322        | NM_175229.2 |        | SRRM2      | serine/arginine repetitive matrix 2                                                                  |
| 159 | -0.728       | NM_145933.2 |        | ST6GAL1    | ST6 beta-galactosamide alpha-2,6-sialyltransferase 1                                                 |

|     | A            | B           | C      | D          | E                                                                                     |
|-----|--------------|-------------|--------|------------|---------------------------------------------------------------------------------------|
| 1   | Fold Change* | ID†         | Notes‡ | Molecules§ | Description                                                                           |
| 160 | -0.603       | NM_026935.3 |        | SULT1C2    | sulfotransferase family, cytosolic, 1C, member 2                                      |
| 161 | 1.459        | NM_020564.1 |        | SULT5A1    | sulfotransferase family 5A, member 1                                                  |
| 162 | 1.264        | NM_009306   |        | SYT1       | synaptotagmin I                                                                       |
| 163 | -0.712       | NM_013769.1 |        | TJP3       | tight junction protein 3 (zona occludens 3)                                           |
| 164 | 1.227        | AK087243    |        | TMCC1      | transmembrane and coiled-coil domain family 1                                         |
| 165 | -0.847       | NM_173453.1 |        | TMEM11     | transmembrane protein 11                                                              |
| 166 | 1.415        | NM_144916.1 |        | TMEM150    | transmembrane protein 150                                                             |
| 167 | 1.180        | AK081890    |        | TMEM164    | transmembrane protein 164                                                             |
| 168 | -0.629       | NM_175507.2 |        | TMEM20     | transmembrane protein 20                                                              |
| 169 | 1.225        | NM_178577.3 |        | TMEM205    | transmembrane protein 205                                                             |
| 170 | -0.792       | NM_013749.1 |        | TNFRSF12A  | tumor necrosis factor receptor superfamily, member 12A                                |
| 171 | -0.769       | AK012264    |        | TOMM40L    | translocase of outer mitochondrial membrane 40 homolog (yeast)-like                   |
| 172 | -0.698       | AK029485    |        | TOMM40L    | translocase of outer mitochondrial membrane 40 homolog (yeast)-like                   |
| 173 | -0.817       | XM_127105.4 |        | TTC7B      | tetratricopeptide repeat domain 7B                                                    |
| 174 | -0.755       | NM_011673   |        | UGCG       | UDP-glucose ceramide glucosyltransferase                                              |
| 175 | -0.654       | NM_013701.1 | D      | UGT1A3     | UDP glucuronosyltransferase 1 family, polypeptide A3                                  |
| 176 | -0.608       | NM_013701.1 | D      | UGT1A3     | UDP glucuronosyltransferase 1 family, polypeptide A3                                  |
| 177 | -0.549       | NM_201643   |        | UGT1A4     | UDP glucuronosyltransferase 1 family, polypeptide A4                                  |
| 178 | -0.601       | NM_011697.1 |        | VEGFB      | vascular endothelial growth factor B                                                  |
| 179 | -0.788       | NM_016852.1 |        | WBP2       | WW domain binding protein 2                                                           |
| 180 | -0.844       | NM_018871.2 |        | YWHAG      | tyrosine 3-monooxygenase/tryptophan 5-monooxygenase activation protein, gamma peptide |
| 181 | 1.547        | NM_009539.2 |        | ZAP70      | zeta-chain (TCR) associated protein kinase 70kDa                                      |
| 182 | -0.872       | NM_026025   |        | ZCRB1      | zinc finger CCHC-type and RNA binding motif 1                                         |
| 183 | -0.803       | NM_025428.1 |        | ZDHHC12    | zinc finger, DHHC-type containing 12                                                  |
| 184 | -0.861       | NM_007496.1 |        | ZFH3       | zinc finger homeobox 3                                                                |
| 185 | -0.786       | NM_009569.1 |        | ZFPM1      | zinc finger protein, multitype 1                                                      |
| 186 | -0.835       | NM_175477.2 |        | ZNF574     | zinc finger protein 574                                                               |
| 187 | -0.910       | XM_355639.1 |        | ZNF664     | zinc finger protein 664                                                               |
| 188 | -0.815       | NM_199143.1 |        | ZNRF2      | zinc and ring finger 2                                                                |
| 189 | 1.319        | XM_357173.1 |        |            | This ID not mapped to the IPAKB                                                       |
| 190 | 1.269        | XM_356927.1 |        |            | This ID not mapped to the IPAKB                                                       |
| 191 | -0.815       | XM_355879.1 |        |            | This ID not mapped to the IPAKB                                                       |
| 192 | 1.168        | XM_133707.3 |        |            | This ID not mapped to the IPAKB                                                       |
| 193 | -0.330       | XM_147335   |        |            | This ID not mapped to the IPAKB                                                       |
| 194 | 1.201        | AK042521    |        |            | This ID not mapped to the IPAKB                                                       |
| 195 | 1.224        | AK044567    |        |            | This ID not mapped to the IPAKB                                                       |
| 196 | 1.209        | AK04526     |        |            | This ID not mapped to the IPAKB                                                       |
| 197 | 1.201        | AK049777    |        |            | This ID not mapped to the IPAKB                                                       |
| 198 | 1.247        | AK051902    |        |            | This ID not mapped to the IPAKB                                                       |
| 199 | 1.367        | XM_132843   |        |            | This ID not mapped to the IPAKB                                                       |

|     | A            | B             | C      | D          | E                               |
|-----|--------------|---------------|--------|------------|---------------------------------|
| 1   | Fold Change* | ID†           | Notes‡ | Molecules§ | Description                     |
| 200 | 1.321        | Birc1cl       |        |            | This ID not mapped to the IPAKB |
| 201 | 1.573        | Mug-ps1       |        |            | This ID not mapped to the IPAKB |
| 202 | 1.874        | NM_027147.1   |        |            | This ID not mapped to the IPAKB |
| 203 | 1.259        | 5330406M23Rik |        |            | This ID not mapped to the IPAKB |
| 204 | 1.952        | NM_027147.1   |        |            | This ID not mapped to the IPAKB |
| 205 | 1.285        | NM_175422.2   |        |            | This ID not mapped to the IPAKB |
| 206 | 1.273        | NM_133946.1   |        |            | This ID not mapped to the IPAKB |
| 207 | -0.841       | XM_365085     |        |            | This ID not mapped to the IPAKB |
| 208 | 1.295        | 4933411D12Rik |        |            | This ID not mapped to the IPAKB |
| 209 | 1.171        | 9430064K01Rik |        |            | This ID not mapped to the IPAKB |
| 210 | 1.388        | 9930031P18Rik |        |            | This ID not mapped to the IPAKB |
| 211 | 1.258        | C130040J23Rik |        |            | This ID not mapped to the IPAKB |
| 212 | 1.313        | 4731420N21    |        |            | This ID not mapped to the IPAKB |
