# Supplementary material
Source: PubMed Central journal article supplement (PMC6314014)
Supplement: NIHMS999248-supplement-Supp_Table_2.pdf [file NIHMS999248-supplement-Supp_Table_2.pdf]

Supplemental Table 2. Biological and toxicological functions of hepatic transcripts of significant differential expression by diet ( $Q < 0.05$ ,  $n = 24$  microarrays). Livers were collected from randomly selected PyMT negative, non-tumor bearing- F2 female sib-pairs fed opposing diets ( $n = 12$  mice fed HFD,  $n = 12$  mice fed MCD). Annotation was performed with Ingenuity Pathway Analysis Knowledge Base.

\*Categories of biological functions as defined by Ingenuity Pathway Analysis Knowledge Base

†P-value describing the probability that the molecules of Supplemental Table 1 associate with a biological function category due to chance

|    | A                                                     | B                 |
|----|-------------------------------------------------------|-------------------|
| 1  | <b>Hepatic biological functions (IPAKB)</b>           |                   |
| 2  | Category*                                             | P-value†          |
| 3  | Lipid Metabolism                                      | 1.12E-05-3.2E-02  |
| 4  | Small Molecule Biochemistry                           | 1.12E-05-3.2E-02  |
| 5  | Nucleic Acid Metabolism                               | 3.79E-05-3.2E-02  |
| 6  | Cell Death                                            | 1.93E-04-3.2E-02  |
| 7  | Embryonic Development                                 | 1.93E-04-3.2E-02  |
| 8  | Carbohydrate Metabolism                               | 3.84E-04-3.2E-02  |
| 9  | Molecular Transport                                   | 6.37E-04-3.2E-02  |
| 10 | Endocrine System Development and Function             | 1.04E-03-3.2E-02  |
| 11 | Amino Acid Metabolism                                 | 1.32E-03-3.2E-02  |
| 12 | Cell Cycle                                            | 1.32E-03-3.2E-02  |
| 13 | Drug Metabolism                                       | 1.32E-03-3.2E-02  |
| 14 | Post-Translational Modification                       | 1.32E-03-2.96E-02 |
| 15 | Cell-To-Cell Signaling and Interaction                | 2.79E-03-3.2E-02  |
| 16 | Cellular Assembly and Organization                    | 2.79E-03-3.2E-02  |
| 17 | Cellular Function and Maintenance                     | 2.79E-03-3.2E-02  |
| 18 | Endocrine System Disorders                            | 4.05E-03-3.2E-02  |
| 19 | Cancer                                                | 4.77E-03-3.2E-02  |
| 20 | Reproductive System Disease                           | 4.77E-03-3.2E-02  |
| 21 | Organ Development                                     | 5.37E-03-3.2E-02  |
| 22 | Respiratory System Development and Function           | 5.37E-03-5.37E-03 |
| 23 | Tissue Development                                    | 6.13E-03-3.2E-02  |
| 24 | Cellular Development                                  | 6.35E-03-3.2E-02  |
| 25 | Cellular Growth and Proliferation                     | 6.35E-03-3.2E-02  |
| 26 | Hematological System Development and Function         | 6.35E-03-3.2E-02  |
| 27 | Immune and Lymphatic System Development and Function  | 6.35E-03-3.2E-02  |
| 28 | Skeletal and Muscular System Development and Function | 6.35E-03-3.2E-02  |
| 29 | Nervous System Development and Function               | 7.23E-03-3.2E-02  |
| 30 | Developmental Disorder                                | 7.64E-03-3.2E-02  |
| 31 | Neurological Disease                                  | 7.64E-03-3.2E-02  |
| 32 | Cardiovascular Disease                                | 8.09E-03-8.09E-03 |
| 33 | Cardiovascular System Development and Function        | 8.09E-03-1.61E-02 |
| 34 | Cell Morphology                                       | 8.09E-03-3.2E-02  |
| 35 | Cellular Movement                                     | 8.09E-03-3.2E-02  |
| 36 | Cellular Response to Therapeutics                     | 8.09E-03-8.09E-03 |
| 37 | Connective Tissue Disorders                           | 8.09E-03-1.85E-02 |
| 38 | DNA Replication, Recombination, and Repair            | 8.09E-03-2.41E-02 |
| 39 | Dermatological Diseases and Conditions                | 8.09E-03-3.2E-02  |
| 40 | Gastrointestinal Disease                              | 8.09E-03-3.2E-02  |
| 41 | Genetic Disorder                                      | 8.09E-03-3.2E-02  |
| 42 | Hair and Skin Development and Function                | 8.09E-03-3.2E-02  |
| 43 | Hematological Disease                                 | 8.09E-03-2.41E-02 |
| 44 | Immune Response                                       | 8.09E-03-1.61E-02 |
| 45 | Immunological Disease                                 | 8.09E-03-3.2E-02  |
| 46 | Inflammatory Disease                                  | 8.09E-03-2.41E-02 |
| 47 | Organ Morphology                                      | 8.09E-03-2.41E-02 |
| 48 | Organismal Development                                | 8.09E-03-3.2E-02  |
| 49 | Organismal Injury and Abnormalities                   | 8.09E-03-3.2E-02  |
| 50 | Protein Trafficking                                   | 8.09E-03-8.09E-03 |
| 51 | Renal and Urological Disease                          | 8.09E-03-3.2E-02  |
| 52 | Reproductive System Development and Function          | 8.09E-03-3.2E-02  |
| 53 | Respiratory Disease                                   | 8.09E-03-8.09E-03 |
| 54 | Skeletal and Muscular Disorders                       | 8.09E-03-1.47E-02 |
| 55 | Tissue Morphology                                     | 8.09E-03-3.2E-02  |
| 56 | Tumor Morphology                                      | 8.09E-03-3.2E-02  |
| 57 | Connective Tissue Development and Function            | 9.1E-03-1.61E-02  |
| 58 | Gene Expression                                       | 1.61E-02-2.41E-02 |

|    | A                                              | B                 |
|----|------------------------------------------------|-------------------|
| 2  | Category*                                      | P-value†          |
| 59 | Hepatic System Development and Function        | 1.61E-02-3.2E-02  |
| 60 | Hepatic System Disease                         | 1.61E-02-2.62E-02 |
| 61 | Metabolic Disease                              | 1.61E-02-3.2E-02  |
| 62 | Viral Function                                 | 1.61E-02-1.61E-02 |
| 63 | Digestive System Development and Function      | 2.41E-02-3.2E-02  |
| 64 | Viral Infection                                | 2.41E-02-2.41E-02 |
| 65 | Vitamin and Mineral Metabolism                 | 2.41E-02-2.41E-02 |
| 66 | Protein Synthesis                              | 3.2E-02-3.2E-02   |
| 67 | Visual System Development and Function         | 3.2E-02-3.2E-02   |
| 68 | <b>Hepatic toxicological functions (IPAKB)</b> |                   |
| 69 | Category                                       | P-value           |
| 70 | Liver Hepatomegaly                             | 1.61E-02-1.29E-01 |
| 71 | Liver Hypertrophy                              | 2.41E-02-2.41E-02 |
| 72 | Liver Proliferation                            | 2.41E-02-4.66E-01 |
| 73 | Hepatocellular Carcinoma                       | 2.62E-02-2.62E-02 |
| 74 | Liver Necrosis/Cell Death                      | 3.54E-02-5.24E-01 |
| 75 | Renal Damage                                   | 6.17E-02-6.17E-02 |
| 76 | Liver Hyperbilirubinemia                       | 6.29E-02-6.29E-02 |
| 77 | Cardiac Hypertrophy                            | 7.05E-02-1.73E-01 |
| 78 | Liver Cirrhosis                                | 9.29E-02-3.4E-01  |
| 79 | Liver Cholestasis                              | 1.48E-01-4.16E-01 |
| 80 | Cardiac Stenosis                               | 1.84E-01-1.84E-01 |
| 81 | Liver Steatosis                                | 2.83E-01-3.61E-01 |
| 82 | Renal Nephritis                                | 2.95E-01-5.5E-01  |
| 83 | Cardiac Arteriopathy                           | 4.74E-01-4.74E-01 |
| 84 | Liver Damage                                   | 5E-01-5E-01       |
| 85 | Cardiac Hemorrhaging                           | 5.46E-01-5.46E-01 |
| 86 | Heart Failure                                  | 1E00-1E00         |
