# Supplementary material
Source: PubMed Central journal article supplement (PMC6314014)
Supplement: NIHMS999248-supplement-Supp_Table_3.pdf [file NIHMS999248-supplement-Supp_Table_3.pdf]

Supplemental Table 3. Mammary tumor transcripts differentially regulated by virulent surface metastasis ( $Q < 0.05$ ,  $n = 66$  microarrays). The gene expression data from individual mammary tumor samples were ordered such that 25% (33 samples) of the total samples came from mice with no surface- or section- metastatic lesions and the longest tumor onset. Gene expression data from these 33 samples served as the reference group when paired with the gene expression data of 33 mammary tumor samples from mice that had the most surface metastatic lesions detected (MET66). Annotation was performed with Ingenuity Pathway Analysis Knowledge Base.

\*Positive fold change is significant fold change increase in gene expression from mammary tumors with virulent surface metastasis relative to mammary tumors with no metastasis. Negative fold change is significant fold change increase in gene expression from mammary tumors with no metastasis relative to mammary tumors with virulent surface metastasis.

†Identification of transcript by RefSeq or Illumina probe ID where RefSeq was not available.

‡Highlights significant transcripts that appear in duplicate due to the redundancy of transcript representation on Illumina Bead Chips.

§Official symbolic name of transcript

||Official descriptive name of transcript

|    | A            | B                              | C              | D      | E             | F                                                                               |
|----|--------------|--------------------------------|----------------|--------|---------------|---------------------------------------------------------------------------------|
| 1  | Fold Change* | False Discovery Rate (q-value) | ID†            | Notes‡ | Molecules§    | Description                                                                     |
| 2  | 1.427        | 4.108                          | NM_029639.1    |        | 1600029D21RIK | RIKEN cDNA 1600029D21 gene                                                      |
| 3  | 1.128        | 3.214                          | XM_001472446.1 |        | 2010315B03RIK | RIKEN cDNA 2010315B03 gene                                                      |
| 4  | 1.139        | 2.38                           | NM_028314.1    |        | 2700097O09RIK | RIKEN cDNA 2700097O09 gene                                                      |
| 5  | -0.895       | 3.214                          | NM_029849.1    |        | 4632433K11RIK | RIKEN cDNA 4632433K11 gene                                                      |
| 6  | -0.832       | 2.708                          | NM_144829.1    |        | AARSD1        | alanyl-tRNA synthetase domain containing 1                                      |
| 7  | -0.867       | 4.108                          | NM_145140      |        | ABCC10        | ATP-binding cassette, sub-family C (CFTR/MRP), member 10                        |
| 8  | 1.694        | 0                              | NM_203502      |        | ABPB          | androgen binding protein beta                                                   |
| 9  | -0.82        | 2.38                           | NM_177470.2    |        | ACAA2         | acetyl-Coenzyme A acyltransferase 2                                             |
| 10 | -0.776       | 0                              | NM_007382      |        | ACADM         | acyl-Coenzyme A dehydrogenase, C-4 to C-12 straight chain                       |
| 11 | 1.149        | 2.708                          | NM_133225.1    |        | ACBD3         | acyl-Coenzyme A binding domain containing 3                                     |
| 12 | 1.351        | 4.108                          | NM_207625.1    |        | ACSL4         | acyl-CoA synthetase long-chain family member 4                                  |
| 13 | -0.796       | 0.797                          | NM_007393.1    |        | ACTB          | actin, beta                                                                     |
| 14 | 1.127        | 2.127                          | NM_019785.1    |        | ACTR10        | actin-related protein 10 homolog ( <i>S. cerevisiae</i> )                       |
| 15 | -0.768       | 0                              | NM_175643.1    | D      | ADAMTS2       | ADAM metallopeptidase with thrombospondin type 1 motif, 2                       |
| 16 | -0.83        | 2.708                          | NM_175643.1    | D      | ADAMTS2       | ADAM metallopeptidase with thrombospondin type 1 motif, 2                       |
| 17 | -0.884       | 4.108                          | NM_025748.2    |        | ADAT2         | adenosine deaminase, tRNA-specific 2, TAD2 homolog ( <i>S. cerevisiae</i> )     |
| 18 | 1.31         | 2.127                          | NM_013758.2    |        | ADD3          | adducin 3 (gamma)                                                               |
| 19 | -0.831       | 2.38                           | NM_009636.1    |        | AEBP1         | AE binding protein 1                                                            |
| 20 | 1.168        | 0.633                          | NM_026375.1    |        | AHCTF1        | AT hook containing transcription factor 1                                       |
| 21 | 1.233        | 2.127                          | NM_145542      |        | AHCYL1        | S-adenosylhomocysteine hydrolase-like 1                                         |
| 22 | -0.812       | 1.138                          | NM_025337.2    |        | AKR7A2        | aldo-keto reductase family 7, member A2 (aflatoxin aldehyde reductase)          |
| 23 | -0.859       | 4.108                          | NM_020332.2    |        | ANKH          | ankylosis, progressive homolog (mouse)                                          |
| 24 | 1.272        | 0                              | NM_024204      |        | ANKRD22       | ankyrin repeat domain 22                                                        |
| 25 | 1.139        | 3.214                          | NM_133872.1    |        | AOF2          | amine oxidase (flavin containing) domain 2                                      |
| 26 | -0.883       | 2.38                           | NM_194341.1    |        | AP1GBP1       | AP1 gamma subunit binding protein 1                                             |
| 27 | 1.187        | 2.708                          | NM_007460.1    |        | AP3D1         | adaptor-related protein complex 3, delta 1 subunit                              |
| 28 | 1.235        | 1.345                          | NM_009681.2    |        | AP3S1         | adaptor-related protein complex 3, sigma 1 subunit                              |
| 29 | -0.801       | 0                              | NM_007470.1    |        | APOD          | apolipoprotein D                                                                |
| 30 | 1.262        | 0.633                          | NM_173743.2    |        | APOL9B        | apolipoprotein L 9b                                                             |
| 31 | 1.207        | 1.01                           | NM_009705.1    |        | ARG2          | arginase, type II                                                               |
| 32 | -0.888       | 2.38                           | NM_008488.1    |        | ARHGEF1       | Rho guanine nucleotide exchange factor (GEF) 1                                  |
| 33 | 1.224        | 2.38                           | NM_025859.1    |        | ARL1          | ADP-ribosylation factor-like 1                                                  |
| 34 | 1.21         | 4.108                          | NM_178050.2    |        | ARL6IP2       | ADP-ribosylation factor-like 6 interacting protein 2                            |
| 35 | -0.821       | 1.401                          | NM_026369.1    |        | ARPC5         | actin related protein 2/3 complex, subunit 5, 16kDa                             |
| 36 | 1.47         | 0                              | NM_012055.1    |        | ASNS          | asparagine synthetase                                                           |
| 37 | -0.829       | 2.127                          | NM_007494.2    |        | ASS1          | argininosuccinate synthetase 1                                                  |
| 38 | -0.851       | 1.138                          | NM_016755.2    |        | ATP5J         | ATP synthase, H <sup>+</sup> transporting, mitochondrial F0 complex, subunit F6 |
| 39 | 1.234        | 4.108                          | NP_536848.1    |        | ATP6          | ATP synthase 6; ATPase subunit 6                                                |
| 40 | 1.141        | 2.38                           | NM_023721.1    |        | ATP6V1D       | ATPase, H <sup>+</sup> transporting, lysosomal 34kDa, V1 subunit D              |
| 41 | 1.157        | 4.108                          | NM_178640      |        | B3GALNT2      | beta-1,3-N-acetylgalactosaminyltransferase 2                                    |

|    | A            | B                              | C           | D      | E          | F                                                    |
|----|--------------|--------------------------------|-------------|--------|------------|------------------------------------------------------|
| 1  | Fold Change* | False Discovery Rate (q-value) | ID†         | Notes‡ | Molecules§ | Description                                          |
| 42 | -0.888       | 4.108                          | NM_019517.2 |        | BACE2      | beta-site APP-cleaving enzyme 2                      |
| 43 | -0.823       | 4.108                          | XM_148990.3 |        | BAT2D1     | BAT2 domain containing 1                             |
| 44 | -0.857       | 2.127                          | NM_175002.1 |        | BC025076   | cDNA sequence BC025076                               |
| 45 | -0.877       | 2.127                          | NM_175044.1 |        | BCOR       | BCL6 co-repressor                                    |
| 46 | -0.804       | 0                              | NM_007542.3 |        | BGN        | biglycan                                             |
| 47 | 1.31         | 0                              | NM_010800.2 | D      | BHLHB8     | basic helix-loop-helix domain containing, class B, 8 |
| 48 | 1.264        | 0                              | NM_010800.2 | D      | BHLHB8     | basic helix-loop-helix domain containing, class B, 8 |
| 49 | -0.805       | 0                              | NM_031397.1 |        | BICC1      | bicaudal C homolog 1 (Drosophila)                    |
| 50 | 1.182        | 2.38                           | NM_008528.3 |        | BLNK       | B-cell linker                                        |
| 51 | -0.884       | 4.108                          | NM_009755.2 |        | BMP1       | bone morphogenetic protein 1                         |
| 52 | 1.239        | 0                              | NM_009761.2 |        | BNIP3L     | BCL2/adenovirus E1B 19kDa interacting protein 3-like |
| 53 | -0.858       | 3.214                          | NM_175277.2 |        | BOLA3      | bolA homolog 3 (E. coli)                             |
| 54 | -0.845       | 1.401                          | NM_023336.2 |        | BRD3       | bromodomain containing 3                             |
| 55 | -0.732       | 2.127                          | NM_007569.1 |        | BTG1       | B-cell translocation gene 1, anti-proliferative      |
| 56 | -0.764       | 3.214                          | NM_013483.1 |        | BTN1A1     | butyrophilin, subfamily 1, member A1                 |
| 57 | -0.865       | 1.401                          | NM_172280.2 |        | C11ORF30   | chromosome 11 open reading frame 30                  |
| 58 | -0.898       | 4.108                          | NM_138757.1 |        | C12ORF11   | chromosome 12 open reading frame 11                  |
| 59 | 1.168        | 0.633                          | AK049325    | D      | C12ORF30   | chromosome 12 open reading frame 30                  |
| 60 | 1.09         | 2.708                          | NM_172722   | D      | C12ORF30   | chromosome 12 open reading frame 30                  |
| 61 | 1.129        | 4.108                          | NM_025427.1 |        | C13ORF15   | chromosome 13 open reading frame 15                  |
| 62 | -0.85        | 4.108                          | NM_021446   |        | C14ORF1    | chromosome 14 open reading frame 1                   |
| 63 | -0.854       | 2.38                           | NM_198609   |        | C15ORF15   | chromosome 15 open reading frame 15                  |
| 64 | -0.878       | 2.708                          | NM_178901.2 |        | C16ORF54   | chromosome 16 open reading frame 54                  |
| 65 | 1.118        | 2.127                          | NM_175287.2 |        | C1ORF174   | chromosome 1 open reading frame 174                  |
| 66 | -0.768       | 0                              | NM_198860.1 |        | C22ORF36   | chromosome 22 open reading frame 36                  |
| 67 | 1.22         | 2.127                          | NM_029554.2 |        | C4ORF19    | chromosome 4 open reading frame 19                   |
| 68 | 1.208        | 0                              | NM_133697.1 |        | C4ORF34    | chromosome 4 open reading frame 34                   |
| 69 | 1.158        | 3.214                          | AK050607    |        | C5ORF28    | chromosome 5 open reading frame 28                   |
| 70 | 1.115        | 3.214                          | NM_025879.1 |        | C5ORF44    | chromosome 5 open reading frame 44                   |
| 71 | -0.802       | 2.38                           | NM_027457.2 |        | C6ORF35    | chromosome 6 open reading frame 35                   |
| 72 | 1.584        | 1.345                          | NM_026336.1 |        | C6ORF58    | chromosome 6 open reading frame 58                   |
| 73 | 1.16         | 3.214                          | NM_177682.3 |        | C7ORF28A   | chromosome 7 open reading frame 28A                  |
| 74 | -0.857       | 3.214                          | NM_178116.2 |        | CAMTA2     | calmodulin binding transcription activator 2         |
| 75 | -0.868       | 4.108                          | AK017510    |        | CBX6       | chromobox homolog 6                                  |
| 76 | -0.849       | 4.108                          | NM_177045.2 |        | CC2D1B     | coiled-coil and C2 domain containing 1B              |
| 77 | -0.792       | 0.797                          | NM_026439.1 |        | CCDC80     | coiled-coil domain containing 80                     |
| 78 | -0.851       | 2.127                          | BC001984    |        | CCNDBP1    | cyclin D-type binding-protein 1                      |
| 79 | 1.207        | 3.214                          | NM_023243.2 |        | CCNH       | cyclin H                                             |
| 80 | -0.824       | 3.214                          | NM_009836.1 |        | CCT3       | chaperonin containing TCP1, subunit 3 (gamma)        |
| 81 | -0.882       | 3.214                          | NM_023223.1 |        | CDC20      | cell division cycle 20 homolog (S. cerevisiae)       |
| 82 | -0.876       | 2.708                          | NM_194444.1 |        | CDK10      | cyclin-dependent kinase 10                           |

|     | A            | B                              | C           | D      | E          | F                                                                             |
|-----|--------------|--------------------------------|-------------|--------|------------|-------------------------------------------------------------------------------|
| 1   | Fold Change* | False Discovery Rate (q-value) | ID†         | Notes‡ | Molecules§ | Description                                                                   |
| 83  | -0.843       | 3.214                          | NM_026373.1 |        | CDK2AP2    | CDK2-associated protein 2                                                     |
| 84  | 1.185        | 4.108                          | NM_007669.2 |        | CDKN1A     | cyclin-dependent kinase inhibitor 1A (p21, Cip1)                              |
| 85  | -0.82        | 1.138                          | NM_009876.2 |        | CDKN1C     | cyclin-dependent kinase inhibitor 1C (p57, Kip2)                              |
| 86  | 1.138        | 1.01                           | NM_173370.3 |        | CDS1       | CDP-diacylglycerol synthase (phosphatidate cytidyltransferase) 1              |
| 87  | -0.759       | 1.138                          | NM_009885.1 |        | CEL        | carboxyl ester lipase (bile salt-stimulated lipase)                           |
| 88  | -0.686       | 3.214                          | NM_017392   |        | CELSR2     | cadherin, EGF LAG seven-pass G-type receptor 2 (flamingo homolog, Drosophila) |
| 89  | 1.389        | 2.708                          | NM_008198.1 |        | CFB        | complement factor B                                                           |
| 90  | 1.412        | 0                              | NM_026929.2 |        | CHAC1      | ChaC, cation transport regulator homolog 1 (E. coli)                          |
| 91  | 1.232        | 0                              | NM_023543.1 |        | CHN2       | chimerin (chimaerin) 2                                                        |
| 92  | -0.843       | 3.214                          | NM_023850.1 |        | CHST1      | carbohydrate (keratan sulfate Gal-6) sulfotransferase 1                       |
| 93  | -0.888       | 0                              | NM_029738.1 |        | CLUAP1     | clusterin associated protein 1                                                |
| 94  | -0.725       | 2.38                           | NM_007742.2 |        | COL1A1     | collagen, type I, alpha 1                                                     |
| 95  | 1.199        | 3.214                          | NM_007736   |        | COL4A5     | collagen, type IV, alpha 5 (Alport syndrome)                                  |
| 96  | -0.839       | 3.214                          | NM_015734.1 |        | COL5A1     | collagen, type V, alpha 1                                                     |
| 97  | -0.78        | 0                              | NM_009933.1 | D      | COL6A1     | collagen, type VI, alpha 1                                                    |
| 98  | -0.794       | 3.214                          | NM_009933.1 | D      | COL6A1     | collagen, type VI, alpha 1                                                    |
| 99  | 1.144        | 3.214                          | NM_173185   |        | CSNK1G1    | casein kinase 1, gamma 1                                                      |
| 100 | -0.839       | 3.214                          | NM_134002.1 |        | CSNK1G2    | casein kinase 1, gamma 2                                                      |
| 101 | -0.885       | 4.108                          | NM_013884.2 |        | CSPG5      | chondroitin sulfate proteoglycan 5 (neuroglycan C)                            |
| 102 | 1.274        | 4.108                          | NM_033616.2 |        | CSPRS      | component of Sp100-rs                                                         |
| 103 | -0.862       | 3.214                          | NM_018761.2 |        | CTNNA1     | catenin (cadherin-associated protein), alpha-like 1                           |
| 104 | -0.828       | 1.138                          | NM_007802.2 |        | CTSK       | cathepsin K                                                                   |
| 105 | 1.239        | 0                              | NM_022325.3 |        | CTSZ       | cathepsin Z                                                                   |
| 106 | -0.878       | 2.38                           | NM_009987.2 |        | CX3CR1     | chemokine (C-X3-C motif) receptor 1                                           |
| 107 | -0.863       | 2.38                           | NM_028868.1 |        | CXXC1      | CXXC finger 1 (PHD domain)                                                    |
| 108 | -0.896       | 2.38                           | XM_109819   |        | CYB5D2     | cytochrome b5 domain containing 2                                             |
| 109 | 1.23         | 3.214                          | NM_010022   |        | DBT        | dihydrolipoamide branched chain transacylase E2                               |
| 110 | 1.163        | 3.214                          | NM_033623.1 |        | DCUN1D1    | DCN1, defective in cullin neddylation 1, domain containing 1 (S. cerevisiae)  |
| 111 | 1.312        | 0.633                          | NM_029083.1 |        | DDIT4      | DNA-damage-inducible transcript 4                                             |
| 112 | 1.294        | 0.633                          | XM_131083.2 |        | DENND2D    | DENN/MADD domain containing 2D                                                |
| 113 | 1.116        | 1.345                          | NM_021428.3 |        | DEXI       | dexamethasone-induced transcript                                              |
| 114 | -0.732       | 2.38                           | NM_138306.1 |        | DGKZ       | diacylglycerol kinase, zeta 104kDa                                            |
| 115 | -0.871       | 3.214                          | NM_013764.1 |        | DGUOK      | deoxyguanosine kinase                                                         |
| 116 | 1.264        | 1.01                           | NM_007839.1 |        | DHX15      | DEAH (Asp-Glu-Ala-His) box polypeptide 15                                     |
| 117 | 1.129        | 3.214                          | NM_148948.2 |        | DICER1     | dicer 1, ribonuclease type III                                                |
| 118 | -0.871       | 3.214                          | NM_015814.2 |        | DKK3       | dickkopf homolog 3 (Xenopus laevis)                                           |
| 119 | 1.351        | 3.214                          | NM_172899.1 |        | DMKN       | dermokine                                                                     |
| 120 | -0.843       | 2.38                           | NM_010068.1 |        | DNMT3B     | DNA (cytosine-5-)-methyltransferase 3 beta                                    |
| 121 | -0.863       | 2.38                           | NM_007879.1 |        | DRG1       | developmentally regulated GTP binding protein 1                               |

|     | A            | B                              | C           | D      | E          | F                                                                                                               |
|-----|--------------|--------------------------------|-------------|--------|------------|-----------------------------------------------------------------------------------------------------------------|
| 1   | Fold Change* | False Discovery Rate (q-value) | ID†         | Notes‡ | Molecules§ | Description                                                                                                     |
| 122 | 1.156        | 3.214                          | NM_007904.2 |        | EDNRB      | endothelin receptor type B                                                                                      |
| 123 | -0.842       | 4.108                          | NM_023240.1 |        | EEF1D      | eukaryotic translation elongation factor 1 delta (guanine nucleotide exchange protein)                          |
| 124 | -0.807       | 4.108                          | NM_026007   |        | EEF1G      | eukaryotic translation elongation factor 1 gamma                                                                |
| 125 | -0.823       | 0.797                          | NM_028889.1 |        | EFHD1      | EF-hand domain family, member D1                                                                                |
| 126 | 1.121        | 3.214                          | NM_010107.2 |        | EFNA1      | ephrin-A1                                                                                                       |
| 127 | 1.599        | 0                              | NM_028133.1 |        | EGLN3      | egl nine homolog 3 (C. elegans)                                                                                 |
| 128 | -0.86        | 2.127                          | NM_146200   |        | EIF3C      | eukaryotic translation initiation factor 3, subunit C                                                           |
| 129 | -0.847       | 2.127                          | NM_025344   |        | EIF3F      | eukaryotic translation initiation factor 3, subunit F                                                           |
| 130 | 1.18         | 2.38                           | NM_080635.1 |        | EIF3H      | eukaryotic translation initiation factor 3, subunit H                                                           |
| 131 | -0.712       | 0                              | NM_007925.2 |        | ELN        | elastin (supravalvular aortic stenosis, Williams-Beuren syndrome)                                               |
| 132 | -0.779       | 0                              | NM_080595.1 |        | EMID1      | EMI domain containing 1                                                                                         |
| 133 | -0.869       | 1.401                          | NM_010129.1 |        | EMP3       | epithelial membrane protein 3                                                                                   |
| 134 | 1.146        | 3.214                          | NM_028013.1 |        | ENDOD1     | endonuclease domain containing 1                                                                                |
| 135 | -0.834       | 3.214                          | NM_013813.1 |        | EPB41L3    | erythrocyte membrane protein band 4.1-like 3                                                                    |
| 136 | 1.16         | 2.127                          | NM_010144.2 |        | EPHB4      | EPH receptor B4                                                                                                 |
| 137 | -0.881       | 3.214                          | NM_007949.2 |        | ERCC2      | excision repair cross-complementing rodent repair deficiency, complementation group 2 (xeroderma pigmentosum D) |
| 138 | -0.859       | 3.214                          | NM_007953.1 |        | ESRRA      | estrogen-related receptor alpha                                                                                 |
| 139 | 1.175        | 4.108                          | AK049827    |        | ETNK1      | ethanolamine kinase 1                                                                                           |
| 140 | 1.165        | 2.708                          | NM_027148.2 |        | EXOSC8     | exosome component 8                                                                                             |
| 141 | -0.828       | 0.797                          | NM_010169.2 |        | F2R        | coagulation factor II (thrombin) receptor                                                                       |
| 142 | 1.13         | 3.214                          | NM_007974   |        | F2RL1      | coagulation factor II (thrombin) receptor-like 1                                                                |
| 143 | -0.821       | 4.108                          | NM_138587.3 |        | FAM3C      | family with sequence similarity 3, member C                                                                     |
| 144 | -0.856       | 3.214                          | NM_010180   |        | FBLN1      | fibulin 1                                                                                                       |
| 145 | 1.186        | 4.108                          | NM_015822.1 |        | FBXL3      | F-box and leucine-rich repeat protein 3                                                                         |
| 146 | -0.874       | 3.214                          | NM_023605.1 |        | FBXO9      | F-box protein 9                                                                                                 |
| 147 | -0.897       | 3.214                          | NM_013907.1 |        | FBXW4      | F-box and WD repeat domain containing 4                                                                         |
| 148 | -0.815       | 2.38                           | NM_010189   |        | FCGRT      | Fc fragment of IgG, receptor, transporter, alpha                                                                |
| 149 | 1.135        | 3.214                          | NM_172591.2 |        | FCHO2      | FCH domain only 2                                                                                               |
| 150 | 1.196        | 0                              | NM_146054.1 |        | FERMT2     | fermitin family homolog 2 (Drosophila)                                                                          |
| 151 | -0.853       | 1.401                          | NM_054071.1 |        | FGFRL1     | fibroblast growth factor receptor-like 1                                                                        |
| 152 | -0.857       | 1.401                          | NM_153573.1 |        | FKBP14     | FK506 binding protein 14, 22 kDa                                                                                |
| 153 | 1.188        | 0                              | NM_010220.2 |        | FKBP5      | FK506 binding protein 5                                                                                         |
| 154 | -0.825       | 2.127                          | NM_177394.2 |        | FLJ35220   | hypothetical protein FLJ35220                                                                                   |
| 155 | -0.818       | 2.127                          | NM_008028.1 |        | FLOT2      | flotillin 2                                                                                                     |
| 156 | -0.854       | 2.127                          | XM_129845.3 |        | FN1        | fibronectin 1                                                                                                   |
| 157 | -0.855       | 3.214                          | NM_021899.2 |        | FOXJ2      | forkhead box J2                                                                                                 |
| 158 | -0.814       | 2.708                          | NM_008047.2 |        | FSTL1      | follistatin-like 1                                                                                              |
| 159 | -0.721       | 1.138                          | NM_010239.1 |        | FTH1       | ferritin, heavy polypeptide 1                                                                                   |
| 160 | -0.869       | 2.708                          | NM_011936.1 |        | FTO        | fat mass and obesity associated                                                                                 |

|     | A            | B                              | C           | D      | E          | F                                                                                                                                    |
|-----|--------------|--------------------------------|-------------|--------|------------|--------------------------------------------------------------------------------------------------------------------------------------|
| 1   | Fold Change* | False Discovery Rate (q-value) | ID†         | Notes‡ | Molecules§ | Description                                                                                                                          |
| 161 | 1.188        | 4.108                          | NM_008056   |        | FZD6       | frizzled homolog 6 (Drosophila)                                                                                                      |
| 162 | -0.871       | 2.38                           | NM_021356.2 |        | GAB1       | GRB2-associated binding protein 1                                                                                                    |
| 163 | -0.871       | 3.214                          | NM_183358.2 |        | GADD45GIP1 | growth arrest and DNA-damage-inducible, gamma interacting protein 1                                                                  |
| 164 | -0.89        | 4.108                          | NM_144908.1 |        | GALNT11    | UDP-N-acetyl-alpha-D-galactosamine:polypeptide N-acetylgalactosaminyltransferase 11 (GalNAc-T11)                                     |
| 165 | 1.273        | 0                              | NM_008084.1 | D      | GAPDH      | glyceraldehyde-3-phosphate dehydrogenase                                                                                             |
| 166 | 1.167        | 2.38                           | NM_008084.2 | D      | GAPDH      | glyceraldehyde-3-phosphate dehydrogenase                                                                                             |
| 167 | 1.151        | 3.214                          | NM_020619.2 |        | GCS1       | glucosidase I                                                                                                                        |
| 168 | -0.885       | 1.138                          | NM_010279.2 |        | GFRA1      | GDNF family receptor alpha 1                                                                                                         |
| 169 | -0.82        | 2.708                          | NM_008116   |        | GGT1       | gamma-glutamyltransferase 1                                                                                                          |
| 170 | 1.186        | 4.108                          | NM_078478.1 |        | GHITM      | growth hormone inducible transmembrane protein                                                                                       |
| 171 | 1.3          | 2.127                          | NM_010288.2 |        | GJA1       | gap junction protein, alpha 1, 43kDa                                                                                                 |
| 172 | 1.2          | 0                              | NM_015828   |        | GNE        | glucosamine (UDP-N-acetyl)-2-epimerase/N-acetylmannosamine kinase                                                                    |
| 173 | -0.849       | 1.401                          | NM_175193.2 |        | GOLIM4     | golgi integral membrane protein 4                                                                                                    |
| 174 | 1.122        | 4.108                          | NM_146133.2 |        | GOLPH3L    | golgi phosphoprotein 3-like                                                                                                          |
| 175 | -0.801       | 0.797                          | NM_016696.1 |        | GPC1       | glypican 1                                                                                                                           |
| 176 | 1.159        | 0.633                          | NM_173866.1 |        | GPT2       | glutamic pyruvate transaminase (alanine aminotransferase) 2                                                                          |
| 177 | 1.098        | 4.108                          | NM_172768.1 |        | GRAMD1B    | GRAM domain containing 1B                                                                                                            |
| 178 | -0.846       | 3.214                          | NM_013541   |        | GSTP1      | glutathione S-transferase pi 1                                                                                                       |
| 179 | -0.8         | 4.108                          | XM_126043.3 |        | H2AFV      | H2A histone family, member V                                                                                                         |
| 180 | 1.233        | 4.108                          | NM_008211.2 |        | H3F3B      | H3 histone, family 3B (H3.3B)                                                                                                        |
| 181 | -0.796       | 0                              | NM_145558   |        | HADHB      | hydroxyacyl-Coenzyme A dehydrogenase/3-ketoacyl-Coenzyme A thiolase/enoyl-Coenzyme A hydratase (trifunctional protein), beta subunit |
| 182 | -0.844       | 4.108                          | NM_025641.2 |        | HCG_25371  | hCG25371                                                                                                                             |
| 183 | -0.861       | 4.108                          | NM_008233.1 |        | HDGF2      | hepatoma-derived growth factor-related protein 2                                                                                     |
| 184 | 1.326        | 2.127                          | NM_178206   |        | HIST1H3B   | histone cluster 1, H3b                                                                                                               |
| 185 | 1.186        | 0                              | NM_178192.1 |        | HIST1H4F   | histone cluster 1, H4f                                                                                                               |
| 186 | 1.2          | 2.127                          | NM_175655.1 |        | HIST1H4I   | histone cluster 1, H4i                                                                                                               |
| 187 | 1.307        | 3.214                          | NM_178215   |        | HIST2H3B   | histone cluster 2, H3b                                                                                                               |
| 188 | 1.181        | 0                              | NM_178211.1 | D      | HIST4H4    | histone cluster 4, H4                                                                                                                |
| 189 | 1.168        | 1.345                          | NM_178210.1 | D      | HIST4H4    | histone cluster 4, H4                                                                                                                |
| 190 | 1.27         | 0                              | NM_013820.1 |        | HK2        | hexokinase 2                                                                                                                         |
| 191 | -0.76        | 2.127                          | NM_207105.1 | D      | HLA-DQB2   | major histocompatibility complex, class II, DQ beta 2                                                                                |
| 192 | -0.797       | 4.108                          | NM_010379.2 | D      | HLA-DQB2   | major histocompatibility complex, class II, DQ beta 2                                                                                |
| 193 | -0.689       | 0                              | NM_182650.2 |        | HNRNPA2B1  | heterogeneous nuclear ribonucleoprotein A2/B1                                                                                        |
| 194 | 1.188        | 0                              | NM_152134.1 | D      | HOMER1     | homer homolog 1 (Drosophila)                                                                                                         |
| 195 | 1.177        | 0                              | NM_152134.1 | D      | HOMER1     | homer homolog 1 (Drosophila)                                                                                                         |
| 196 | -0.849       | 3.214                          | XM_133550.4 |        | HOMER2     | homer homolog 2 (Drosophila)                                                                                                         |

|     | A            | B                              | C           | D      | E          | F                                                                   |
|-----|--------------|--------------------------------|-------------|--------|------------|---------------------------------------------------------------------|
| 1   | Fold Change* | False Discovery Rate (q-value) | ID†         | Notes‡ | Molecules§ | Description                                                         |
| 197 | 1.208        | 1.345                          | NM_133255   |        | HOOK2      | hook homolog 2 (Drosophila)                                         |
| 198 | -0.779       | 0                              | NM_017370.1 |        | HPR        | haptoglobin-related protein                                         |
| 199 | -0.802       | 0.797                          | NM_008288   |        | HSD11B1    | hydroxysteroid (11-beta) dehydrogenase 1                            |
| 200 | 1.227        | 0.633                          | NM_019657.2 |        | HSD17B12   | hydroxysteroid (17-beta) dehydrogenase 12                           |
| 201 | -0.721       | 0.797                          | NM_008302.2 | D      | HSP90AB1   | heat shock protein 90kDa alpha (cytosolic), class B member 1        |
| 202 | -0.81        | 1.138                          | NM_008302.2 | D      | HSP90AB1   | heat shock protein 90kDa alpha (cytosolic), class B member 1        |
| 203 | 1.189        | 1.01                           | NM_173752.1 |        | HSPC159    | galectin-related protein                                            |
| 204 | -0.838       | 3.214                          | NM_008305.2 |        | HSPG2      | heparan sulfate proteoglycan 2                                      |
| 205 | 1.189        | 0                              | NM_008307.1 |        | HTF9C      | Hpall tiny fragments locus 9C                                       |
| 206 | 1.116        | 3.214                          | NM_019752.2 |        | HTRA2      | HtrA serine peptidase 2                                             |
| 207 | 1.323        | 0                              | NM_026790.1 |        | IFI27      | interferon, alpha-inducible protein 27                              |
| 208 | 1.234        | 3.214                          | NM_008332.2 |        | IFIT2      | interferon-induced protein with tetratricopeptide repeats 2         |
| 209 | 1.359        | 2.38                           | NM_026820   |        | IFITM1     | interferon induced transmembrane protein 1 (9-27)                   |
| 210 | 1.577        | 0                              | NM_025378.1 | D      | IFITM3     | interferon induced transmembrane protein 3 (1-8U)                   |
| 211 | 1.467        | 0                              | NM_025378.1 | D      | IFITM3     | interferon induced transmembrane protein 3 (1-8U)                   |
| 212 | -0.835       | 1.138                          | XM_194109.2 |        | IGSF3      | immunoglobulin superfamily, member 3                                |
| 213 | -0.755       | 2.127                          | NM_010549.1 |        | IL11RA     | interleukin 11 receptor, alpha                                      |
| 214 | -0.835       | 3.214                          | NM_008361   |        | IL1B       | interleukin 1, beta                                                 |
| 215 | -0.886       | 3.214                          | AK020663    |        | IL6R       | interleukin 6 receptor                                              |
| 216 | -0.879       | 2.127                          | NM_011919.3 |        | ING1       | inhibitor of growth family, member 1                                |
| 217 | 1.207        | 0.633                          | NM_029665.2 |        | IPO11      | importin 11                                                         |
| 218 | -0.866       | 3.214                          | NM_025526.1 |        | ISCU       | iron-sulfur cluster scaffold homolog (E. coli)                      |
| 219 | -0.889       | 4.108                          | NM_012043.2 |        | ISLR       | immunoglobulin superfamily containing leucine-rich repeat           |
| 220 | 1.246        | 0                              | XM_194279   |        | JMJD1A     | jumonji domain containing 1A                                        |
| 221 | -0.817       | 1.138                          | NM_008416.1 |        | JUNB       | jun B proto-oncogene                                                |
| 222 | -0.829       | 0                              | NM_172872.2 |        | KANK4      | KN motif and ankyrin repeat domains 4                               |
| 223 | -0.874       | 2.127                          | NM_145958.1 |        | KBTBD2     | kelch repeat and BTB (POZ) domain containing 2                      |
| 224 | -0.812       | 1.138                          | XM_133614.4 |        | KCTD14     | potassium channel tetramerisation domain containing 14              |
| 225 | -0.886       | 3.214                          | NM_011317.2 |        | KHDRBS1    | KH domain containing, RNA binding, signal transduction associated 1 |
| 226 | 1.15         | 1.345                          | NM_028791.3 |        | KIAA0082   | KIAA0082                                                            |
| 227 | -0.76        | 3.214                          | NM_020568.1 |        | KIAA1881   | KIAA1881                                                            |
| 228 | -0.852       | 0                              | XM_358544.1 |        | KIF1A      | kinesin family member 1A                                            |
| 229 | -0.617       | 4.108                          | NM_008443.2 |        | KIF3A      | kinesin family member 3A                                            |
| 230 | 1.116        | 4.108                          | NM_010629.1 |        | KIFAP3     | kinesin-associated protein 3                                        |
| 231 | 1.124        | 4.108                          | NM_010685.2 |        | LAMP2      | lysosomal-associated membrane protein 2                             |
| 232 | -0.802       | 3.214                          | NM_010688.2 |        | LASP1      | LIM and SH3 protein 1                                               |
| 233 | -0.864       | 1.401                          | NM_008879.2 |        | LCP1       | lymphocyte cytosolic protein 1 (L-plastin)                          |
| 234 | 1.218        | 2.127                          | NM_010708.1 |        | LOC284194  | galectin-9 like                                                     |
| 235 | -0.871       | 1.401                          | NM_007905.1 |        | LOC653441  | similar to polyhomeotic 1-like                                      |
| 236 | 1.111        | 3.214                          | NM_028894.1 |        | LONRF3     | LON peptidase N-terminal domain and ring finger 3                   |
| 237 | -0.816       | 1.138                          | NM_010729.2 |        | LOXL1      | lysyl oxidase-like 1                                                |

|     | A            | B                              | C           | D      | E           | F                                                                                                      |
|-----|--------------|--------------------------------|-------------|--------|-------------|--------------------------------------------------------------------------------------------------------|
| 1   | Fold Change* | False Discovery Rate (q-value) | ID†         | Notes‡ | Molecules§  | Description                                                                                            |
| 238 | -0.727       | 2.127                          | NM_029796.2 |        | LRG1        | leucine-rich alpha-2-glycoprotein 1                                                                    |
| 239 | -0.857       | 0                              | NM_177152.4 |        | LRIG3       | leucine-rich repeats and immunoglobulin-like domains 3                                                 |
| 240 | -0.748       | 0                              | XM_358823.1 |        | LRRC15      | leucine rich repeat containing 15                                                                      |
| 241 | 1.202        | 0                              | NM_025948.1 |        | LSM14A      | LSM14A, SCD6 homolog A ( <i>S. cerevisiae</i> )                                                        |
| 242 | -0.872       | 2.38                           | NM_030597.2 |        | LSM2        | LSM2 homolog, U6 small nuclear RNA associated ( <i>S. cerevisiae</i> )                                 |
| 243 | -0.801       | 3.214                          | NM_010741   |        | LY6C1       | lymphocyte antigen 6 complex, locus C1                                                                 |
| 244 | -0.863       | 3.214                          | NM_172778.1 |        | MAOB        | monoamine oxidase B                                                                                    |
| 245 | -0.889       | 4.108                          | NM_009006   |        | MAP4K2      | mitogen-activated protein kinase kinase kinase kinase 2                                                |
| 246 | 1.181        | 4.108                          | NM_027314.2 |        | MARCH5      | membrane-associated ring finger (C3HC4) 5                                                              |
| 247 | -0.855       | 2.708                          | AK031598.1  |        | MASP1       | mannan-binding lectin serine peptidase 1 (C4/C2 activating component of Ra-reactive factor)            |
| 248 | -0.834       | 0.797                          | NM_008567.1 |        | MCM6        | minichromosome maintenance complex component 6                                                         |
| 249 | 1.412        | 4.108                          | AK042346    |        | MED23       | mediator complex subunit 23                                                                            |
| 250 | -0.882       | 2.708                          | NM_145426.1 |        | MFAP3       | microfibrillar-associated protein 3                                                                    |
| 251 | -0.855       | 2.127                          | NM_015776   |        | MFAP5       | microfibrillar associated protein 5                                                                    |
| 252 | -0.682       | 2.127                          | NM_008594   |        | MFGE8       | milk fat globule-EGF factor 8 protein                                                                  |
| 253 | 1.123        | 3.214                          | AK007898    |        | MFSD11      | major facilitator superfamily domain containing 11                                                     |
| 254 | 1.134        | 3.214                          | NM_026050.1 |        | MGC12966    | hypothetical protein LOC84792                                                                          |
| 255 | -0.767       | 0.797                          | NM_012022.1 |        | MGI:1349458 | per-pentamer repeat gene                                                                               |
| 256 | 1.472        | 0                              | NM_010806.1 | D      | MLLT4       | myeloid/lymphoid or mixed-lineage leukemia (trithorax homolog, <i>Drosophila</i> ); translocated to, 4 |
| 257 | 1.119        | 4.108                          | NM_010806.1 | D      | MLLT4       | myeloid/lymphoid or mixed-lineage leukemia (trithorax homolog, <i>Drosophila</i> ); translocated to, 4 |
| 258 | -0.776       | 2.38                           | NM_026178.2 |        | MMD         | monocyte to macrophage differentiation-associated                                                      |
| 259 | -0.741       | 0                              | NM_008610.1 |        | MMP2        | matrix metalloproteinase 2 (gelatinase A, 72kDa gelatinase, 72kDa type IV collagenase)                 |
| 260 | -0.876       | 4.108                          | NM_010809.1 |        | MMP3        | matrix metalloproteinase 3 (stromelysin 1, progelatinase)                                              |
| 261 | -0.862       | 0.797                          | XM_357108.1 |        | MRPL44      | mitochondrial ribosomal protein L44                                                                    |
| 262 | -0.826       | 2.127                          | NM_028722.1 |        | MSL-1       | male-specific lethal-1 homolog                                                                         |
| 263 | -0.812       | 0                              | NM_010833.1 |        | MSN         | moesin                                                                                                 |
| 264 | -0.849       | 3.214                          | NM_054082.1 |        | MTA3        | metastasis associated 1 family, member 3                                                               |
| 265 | -0.859       | 3.214                          | NM_019880.2 | D      | MTCH1       | mitochondrial carrier homolog 1 ( <i>C. elegans</i> )                                                  |
| 266 | -0.864       | 2.127                          | NM_019880.2 | D      | MTCH1       | mitochondrial carrier homolog 1 ( <i>C. elegans</i> )                                                  |
| 267 | 1.138        | 4.108                          | NM_026002.3 |        | MTDH        | metadherin                                                                                             |
| 268 | -0.869       | 4.108                          | NM_178051.3 |        | MTERFD2     | MTERF domain containing 2                                                                              |
| 269 | -0.821       | 2.127                          | NM_013827.1 |        | MTF2        | metal response element binding transcription factor 2                                                  |
| 270 | 1.137        | 1.345                          | NM_172308.2 |        | MTHFD1L     | methylenetetrahydrofolate dehydrogenase (NADP+ dependent) 1-like                                       |
| 271 | 1.304        | 0                              | NM_008638   |        | MTHFD2      | methylenetetrahydrofolate dehydrogenase (NADP+ dependent) 2, methenyltetrahydrofolate cyclohydrolase   |
| 272 | -0.865       | 2.708                          | AK010766    |        | MTIF2       | mitochondrial translational initiation factor 2                                                        |
| 273 | -0.844       | 2.127                          | NM_013604.1 |        | MTX1        | metaxin 1                                                                                              |



|     | A            | B                              | C           | D      | E          | F                                                                                                                        |
|-----|--------------|--------------------------------|-------------|--------|------------|--------------------------------------------------------------------------------------------------------------------------|
| 1   | Fold Change* | False Discovery Rate (q-value) | ID†         | Notes‡ | Molecules§ | Description                                                                                                              |
| 274 | 1.279        | 0.633                          | NM_013606   |        | MX1        | myxovirus (influenza virus) resistance 1, interferon-inducible protein p78 (mouse)                                       |
| 275 | -0.854       | 1.138                          | NM_139300   | D      | MYLK       | myosin light chain kinase                                                                                                |
| 276 | -0.859       | 2.708                          | NM_139300   | D      | MYLK       | myosin light chain kinase                                                                                                |
| 277 | 1.135        | 4.108                          | NM_010863.1 |        | MYO1B      | myosin IB                                                                                                                |
| 278 | 1.207        | 0                              | NM_021524.1 |        | NAMPT      | nicotinamide phosphoribosyltransferase                                                                                   |
| 279 | -0.812       | 1.138                          | NM_173437.1 |        | NAV1       | neuron navigator 1                                                                                                       |
| 280 | 1.258        | 3.214                          | NM_025987.1 |        | NDUFA6     | NADH dehydrogenase (ubiquinone) 1 alpha subcomplex, 6, 14kDa                                                             |
| 281 | -0.831       | 2.127                          | NM_026703.1 |        | NDUFA8     | NADH dehydrogenase (ubiquinone) 1 alpha subcomplex, 8, 19kDa                                                             |
| 282 | 1.347        | 2.38                           | NM_023172.2 |        | NDUFB9     | NADH dehydrogenase (ubiquinone) 1 beta subcomplex, 9, 22kDa                                                              |
| 283 | -0.921       | 3.214                          | NM_010890.2 |        | NEDD4      | neural precursor cell expressed, developmentally down-regulated 4                                                        |
| 284 | -0.774       | 0.797                          | NM_010906.1 | D      | NFIX       | nuclear factor I/X (CCAAT-binding transcription factor)                                                                  |
| 285 | -0.861       | 3.214                          | S81451      | D      | NFIX       | nuclear factor I/X (CCAAT-binding transcription factor)                                                                  |
| 286 | -0.861       | 2.708                          | NM_010917.1 |        | NID1       | nidogen 1                                                                                                                |
| 287 | 1.217        | 0.633                          | NM_008695.1 |        | NID2       | nidogen 2 (osteonidogen)                                                                                                 |
| 288 | 1.182        | 2.127                          | NM_021303.1 |        | NOC2L      | nucleolar complex associated 2 homolog (S. cerevisiae)                                                                   |
| 289 | -0.869       | 3.214                          | NM_133800.2 |        | NOL12      | nucleolar protein 12                                                                                                     |
| 290 | -0.885       | 2.708                          | NM_025533.1 |        | NOSIP      | nitric oxide synthase interacting protein                                                                                |
| 291 | 1.131        | 2.708                          | NM_145469.1 |        | NPAL2      | NIPA-like domain containing 2                                                                                            |
| 292 | -0.903       | 3.214                          | NM_010151.1 |        | NR2F1      | nuclear receptor subfamily 2, group F, member 1                                                                          |
| 293 | -0.871       | 4.108                          | NM_008737.1 |        | NRP1       | neuropilin 1                                                                                                             |
| 294 | -0.851       | 0.797                          | NM_008740.2 |        | NSF        | N-ethylmaleimide-sensitive factor                                                                                        |
| 295 | -0.898       | 3.214                          | NM_010947.2 |        | NTN2L      | netrin 2-like (chicken)                                                                                                  |
| 296 | 1.197        | 2.38                           | NM_139144.2 |        | OGT        | O-linked N-acetylglucosamine (GlcNAc) transferase (UDP-N-acetylglucosamine:polypeptide-N-acetylglucosaminyl transferase) |
| 297 | -0.911       | 4.108                          | NM_146332.1 |        | OLFR135    | olfactory receptor 135                                                                                                   |
| 298 | 1.197        | 3.214                          | NM_130885.1 |        | OXR1       | oxidation resistance 1                                                                                                   |
| 299 | 1.461        | 0                              | NM_008774.2 |        | PABPC1     | poly(A) binding protein, cytoplasmic 1                                                                                   |
| 300 | -0.854       | 3.214                          | NM_011960.1 |        | PARG       | poly (ADP-ribose) glycohydrolase                                                                                         |
| 301 | 1.212        | 0.633                          | NM_030253.1 |        | PARP9      | poly (ADP-ribose) polymerase family, member 9                                                                            |
| 302 | -0.833       | 0.797                          | NM_008788.1 |        | PCOLCE     | procollagen C-endopeptidase enhancer                                                                                     |
| 303 | 1.139        | 2.708                          | XM_133378.3 |        | PDCD2L     | programmed cell death 2-like                                                                                             |
| 304 | -0.882       | 4.108                          | AK011999    |        | PDE4B      | phosphodiesterase 4B, cAMP-specific (phosphodiesterase E4 dunce homolog, Drosophila)                                     |
| 305 | 1.16         | 3.214                          | NM_008808   |        | PDGFA      | platelet-derived growth factor alpha polypeptide                                                                         |
| 306 | -0.849       | 2.38                           | NM_011058.1 |        | PDGFRA     | platelet-derived growth factor receptor, alpha polypeptide                                                               |
| 307 | -0.857       | 3.214                          | NM_016861.1 |        | PDLIM1     | PDZ and LIM domain 1 (elfin)                                                                                             |
| 308 | -0.865       | 3.214                          | NM_026441.2 |        | PEF1       | penta-EF-hand domain containing 1                                                                                        |
| 309 | 1.146        | 2.38                           | NM_008827.2 |        | PGF        | placental growth factor                                                                                                  |
| 310 | 1.413        | 0                              | NM_008828   |        | PGK1       | phosphoglycerate kinase 1                                                                                                |
| 311 | 1.299        | 3.214                          | NM_016783.2 |        | PGRMC1     | progesterone receptor membrane component 1                                                                               |

|     | A            | B                              | C           | D      | E            | F                                                                 |
|-----|--------------|--------------------------------|-------------|--------|--------------|-------------------------------------------------------------------|
| 1   | Fold Change* | False Discovery Rate (q-value) | ID†         | Notes‡ | Molecules§   | Description                                                       |
| 312 | 1.159        | 2.38                           | NM_007531.1 |        | PHB2         | prohibitin 2                                                      |
| 313 | -0.884       | 3.214                          | NM_146135.1 |        | PIAS3        | protein inhibitor of activated STAT, 3                            |
| 314 | 1.415        | 2.127                          | NM_133779.1 |        | PIGT         | phosphatidylinositol glycan anchor biosynthesis, class T          |
| 315 | 1.953        | 0.633                          | NM_008843.1 |        | PIP          | prolactin-induced protein                                         |
| 316 | -0.868       | 3.214                          | NM_008850.1 |        | PITPNA       | phosphatidylinositol transfer protein, alpha                      |
| 317 | -0.874       | 4.108                          | NM_008873.2 |        | PLAU         | plasminogen activator, urokinase                                  |
| 318 | -0.838       | 2.38                           | NM_011962.2 |        | PLOD3        | procollagen-lysine, 2-oxoglutarate 5-dioxygenase 3                |
| 319 | -0.808       | 3.214                          | NM_025802.1 |        | PNPLA2       | patatin-like phospholipase domain containing 2                    |
| 320 | -0.827       | 1.401                          | XM_282920.1 |        | POLR2E       | polymerase (RNA) II (DNA directed) polypeptide E, 25kDa           |
| 321 | 1.301        | 3.214                          | NM_023127   |        | POLR2K       | polymerase (RNA) II (DNA directed) polypeptide K, 7.0kDa          |
| 322 | -0.882       | 4.108                          | NM_008854   |        | PRKACA       | protein kinase, cAMP-dependent, catalytic, alpha                  |
| 323 | -0.817       | 3.214                          | NM_011100.3 |        | PRKACB       | protein kinase, cAMP-dependent, catalytic, beta                   |
| 324 | -0.786       | 0                              | NM_011101.3 |        | PRKCA        | protein kinase C, alpha                                           |
| 325 | -0.865       | 0                              | XM_131444.4 |        | PRPF4        | PRP4 pre-mRNA processing factor 4 homolog (yeast)                 |
| 326 | 1.134        | 4.108                          | NM_133701.1 |        | PRPF6        | PRP6 pre-mRNA processing factor 6 homolog (S. cerevisiae)         |
| 327 | -0.805       | 1.401                          | NM_028195   |        | PSCD4        | pleckstrin homology, Sec7 and coiled-coil domains 4               |
| 328 | -0.882       | 2.38                           | NM_133948.2 |        | PSIP1        | PC4 and SFRS1 interacting protein 1                               |
| 329 | 1.215        | 4.108                          | NM_011191.1 |        | PSME2B-PS    | protease (prosome, macropain) 28 subunit beta B, pseudogene       |
| 330 | -0.872       | 3.214                          | XM_127497.2 |        | PTCD2        | pentatricopeptide repeat domain 2                                 |
| 331 | -0.916       | 4.108                          | NM_008984   |        | PTPRM        | protein tyrosine phosphatase, receptor type, M                    |
| 332 | -0.878       | 4.108                          | AK032604    |        | PTPRS        | protein tyrosine phosphatase, receptor type, S                    |
| 333 | 1.161        | 2.127                          | NM_021888.1 |        | QTRT1        | queuine tRNA-ribosyltransferase 1 (tRNA-guanine transglycosylase) |
| 334 | -0.797       | 0                              | NM_008997.1 |        | RAB11B       | RAB11B, member RAS oncogene family                                |
| 335 | -0.861       | 4.108                          | NM_009000.2 |        | RAB24        | RAB24, member RAS oncogene family                                 |
| 336 | -0.896       | 2.708                          | NM_009005.1 |        | RAB7A        | RAB7A, member RAS oncogene family                                 |
| 337 | -0.854       | 3.214                          | NM_009015.2 |        | RAD54L       | RAD54-like (S. cerevisiae)                                        |
| 338 | -0.876       | 2.38                           | NM_009058.1 |        | RALGDS       | ral guanine nucleotide dissociation stimulator                    |
| 339 | -0.84        | 1.401                          | NM_178045.3 | D      | RASSF4       | Ras association (RalGDS/AF-6) domain family member 4              |
| 340 | -0.843       | 2.127                          | NM_178045.3 | D      | RASSF4       | Ras association (RalGDS/AF-6) domain family member 4              |
| 341 | -0.777       | 0                              | NM_009031.2 |        | RBBP7        | retinoblastoma binding protein 7                                  |
| 342 | 1.217        | 2.127                          | XM_131139.4 |        | RBM15        | RNA binding motif protein 15                                      |
| 343 | 1.164        | 0                              | NM_178608.2 |        | REEP1        | receptor accessory protein 1                                      |
| 344 | -0.816       | 0                              | NM_007874.2 |        | REEP5        | receptor accessory protein 5                                      |
| 345 | 1.15         | 4.108                          | NM_139292.1 |        | REEP6        | receptor accessory protein 6                                      |
| 346 | 1.515        | 2.127                          | NR_003278.1 |        | RN18S        | 18S RNA                                                           |
| 347 | -0.862       | 2.708                          | NM_013876.2 |        | RNF11        | ring finger protein 11                                            |
| 348 | 1.098        | 4.108                          | NM_153503.1 |        | RNF113A1     | ring finger protein 113A1                                         |
| 349 | -0.884       | 2.708                          | NM_028019.1 |        | RNF135       | ring finger protein 135                                           |
| 350 | -0.846       | 3.214                          | NM_207204.1 |        | RP4-691N24.1 | ninein-like                                                       |
| 351 | 1.23         | 2.127                          | NM_009076   |        | RPL12        | ribosomal protein L12                                             |
| 352 | -0.846       | 0.797                          | NM_022891.1 |        | RPL23        | ribosomal protein L23                                             |

|     | A            | B                              | C           | D      | E          | F                                                                                                      |
|-----|--------------|--------------------------------|-------------|--------|------------|--------------------------------------------------------------------------------------------------------|
| 1   | Fold Change* | False Discovery Rate (q-value) | ID†         | Notes‡ | Molecules§ | Description                                                                                            |
| 353 | 1.244        | 4.108                          | NM_026055.1 |        | RPL39      | ribosomal protein L39                                                                                  |
| 354 | 1.143        | 3.214                          | NM_011297.2 |        | RPS24      | ribosomal protein S24                                                                                  |
| 355 | 1.433        | 0.633                          | NM_021384.2 |        | RSAD2      | radical S-adenosyl methionine domain containing 2                                                      |
| 356 | -0.89        | 2.708                          | NM_019685.1 |        | RUVBL1     | RuvB-like 1 (E. coli)                                                                                  |
| 357 | 1.369        | 1.01                           | NM_009112.1 |        | S100A10    | S100 calcium binding protein A10                                                                       |
| 358 | -0.865       | 4.108                          | NM_016926.1 |        | SART3      | squamous cell carcinoma antigen recognized by T cells 3                                                |
| 359 | -0.846       | 2.127                          | NM_153790.1 |        | SCARF2     | scavenger receptor class F, member 2                                                                   |
| 360 | -0.731       | 0                              | NM_011325.1 |        | SCNN1B     | sodium channel, nonvoltage-gated 1, beta (Liddle syndrome)                                             |
| 361 | -0.881       | 3.214                          | NM_011327.1 |        | SCP2       | sterol carrier protein 2                                                                               |
| 362 | 1.306        | 3.214                          | NM_025468.1 |        | SEC11C     | SEC11 homolog C (S. cerevisiae)                                                                        |
| 363 | 1.164        | 1.01                           | NM_153055.2 |        | SEC63      | SEC63 homolog (S. cerevisiae)                                                                          |
| 364 | -0.888       | 2.127                          | XM_127336.2 |        | SECISBP2   | SECIS binding protein 2                                                                                |
| 365 | -0.698       | 0                              | NM_011340.2 |        | SERPINF1   | serpin peptidase inhibitor, clade F (alpha-2 antiplasmin, pigment epithelium derived factor), member 1 |
| 366 | -0.834       | 1.401                          | NM_030261   |        | SESN3      | sestrin 3                                                                                              |
| 367 | -0.783       | 0.797                          | NM_009186   |        | SFRS10     | splicing factor, arginine/serine-rich 10 (transformer 2 homolog, Drosophila)                           |
| 368 | -0.794       | 0.797                          | NM_172755.2 |        | SFRS14     | splicing factor, arginine/serine-rich 14                                                               |
| 369 | -0.875       | 2.127                          | NM_024480.2 |        | SH3BP5L    | SH3-binding domain protein 5-like                                                                      |
| 370 | 1.186        | 4.108                          | NM_009194.1 |        | SLC12A2    | solute carrier family 12 (sodium/potassium/chloride transporters), member 2                            |
| 371 | 1.283        | 0                              | NM_018861.2 |        | SLC1A4     | solute carrier family 1 (glutamate/neutral amino acid transporter), member 4                           |
| 372 | -0.802       | 0.797                          | NM_153150.1 |        | SLC25A1    | solute carrier family 25 (mitochondrial carrier; citrate transporter), member 1                        |
| 373 | 1.385        | 0                              | NM_011400.1 |        | SLC2A1     | solute carrier family 2 (facilitated glucose transporter), member 1                                    |
| 374 | -0.9         | 2.38                           | NM_021435.1 |        | SLC35B4    | solute carrier family 35, member B4                                                                    |
| 375 | 1.161        | 2.127                          | NM_032008.2 |        | SLMAP      | sarcolemma associated protein                                                                          |
| 376 | -0.886       | 3.214                          | NM_020618.3 |        | SMARCE1    | SWI/SNF related, matrix associated, actin dependent regulator of chromatin, subfamily e, member 1      |
| 377 | -0.823       | 1.401                          | NM_022315.1 |        | SMOC2      | SPARC related modular calcium binding 2                                                                |
| 378 | 1.158        | 2.38                           | NM_029701.1 |        | SPCS3      | signal peptidase complex subunit 3 homolog (S. cerevisiae)                                             |
| 379 | 1.263        | 0                              | NM_011451.1 |        | SPHK1      | sphingosine kinase 1                                                                                   |
| 380 | -0.849       | 4.108                          | NM_025287.1 |        | SPOP       | speckle-type POZ protein                                                                               |
| 381 | -0.879       | 2.127                          | NM_029035.2 |        | SPSB1      | splA/ryanodine receptor domain and SOCS box containing 1                                               |
| 382 | -0.805       | 0.797                          | NM_175836.1 |        | SPTBN1     | spectrin, beta, non-erythrocytic 1                                                                     |
| 383 | 1.213        | 2.38                           | NM_026130.1 |        | SRPR       | signal recognition particle receptor ('docking protein')                                               |
| 384 | 1.258        | 3.214                          | NM_026155.1 |        | SSR3       | signal sequence receptor, gamma (translocon-associated protein gamma)                                  |
| 385 | 1.178        | 0                              | NM_153091.2 |        | ST7L       | suppression of tumorigenicity 7 like                                                                   |
| 386 | 1.234        | 3.214                          | BC057690.1  |        | STAT1      | signal transducer and activator of transcription 1, 91kDa                                              |

|     | A            | B                              | C              | D      | E          | F                                                               |
|-----|--------------|--------------------------------|----------------|--------|------------|-----------------------------------------------------------------|
| 1   | Fold Change* | False Discovery Rate (q-value) | ID†            | Notes‡ | Molecules§ | Description                                                     |
| 387 | -0.812       | 4.108                          | NM_028800      |        | STK40      | serine/threonine kinase 40                                      |
| 388 | -0.862       | 3.214                          | NM_175162.2    |        | STOX2      | storkhead box 2                                                 |
| 389 | -0.834       | 4.108                          | NM_009304.1    |        | SYNGR2     | synaptogyrin 2                                                  |
| 390 | 1.398        | 0.633                          | NM_020047.2    |        | TACSTD2    | tumor-associated calcium signal transducer 2                    |
| 391 | 1.204        | 3.214                          | NM_001081499.2 |        | TBC1D8B    | TBC1 domain family, member 8B (with GRAM domain)                |
| 392 | -0.788       | 1.401                          | NM_009368.1    |        | TGFB3      | transforming growth factor, beta 3                              |
| 393 | -0.885       | 3.214                          | XM_129857.4    |        | TGFBRAP1   | transforming growth factor, beta receptor associated protein 1  |
| 394 | -0.799       | 1.138                          | NM_009382.2    |        | THY1       | Thy-1 cell surface antigen                                      |
| 395 | -0.78        | 0                              | NM_011593      |        | TIMP1      | TIMP metalloproteinase inhibitor 1                              |
| 396 | -0.721       | 0                              | NM_009388.2    |        | TKT        | transketolase (Wernicke-Korsakoff syndrome)                     |
| 397 | 1.194        | 3.214                          | NM_134020.1    |        | TMED4      | transmembrane emp24 protein transport domain containing 4       |
| 398 | 1.129        | 4.108                          | NM_201359.1    |        | TMEM106C   | transmembrane protein 106C                                      |
| 399 | -0.866       | 1.401                          | NM_133804.1    |        | TMEM132A   | transmembrane protein 132A                                      |
| 400 | 1.131        | 2.38                           | NM_028264.2    |        | TMEM55A    | transmembrane protein 55A                                       |
| 401 | 1.149        | 2.127                          | NM_024246.3    |        | TMEM79     | transmembrane protein 79                                        |
| 402 | 1.138        | 3.214                          | NM_152800.1    |        | TOR2A      | torsin family 2, member A                                       |
| 403 | 1.185        | 2.38                           | NM_009413.1    |        | TPD52L1    | tumor protein D52-like 1                                        |
| 404 | -0.635       | 2.38                           | NM_022314      |        | TPM3       | tropomyosin 3                                                   |
| 405 | 1.191        | 4.108                          | NM_009418.1    |        | TPP2       | tripeptidyl peptidase II                                        |
| 406 | -0.86        | 1.401                          | NM_176842.2    |        | TPRKB      | TP53RK binding protein                                          |
| 407 | 1.243        | 1.01                           | NM_028173.1    |        | TRAM1      | translocation associated membrane protein 1                     |
| 408 | 1.291        | 0                              | NM_144554.1    |        | TRIB3      | tribbles homolog 3 (Drosophila)                                 |
| 409 | 1.194        | 0.633                          | XM_126545.2    |        | TRIM25     | tripartite motif-containing 25                                  |
| 410 | 1.269        | 2.38                           | NM_026473.2    |        | TUBB6      | tubulin, beta 6                                                 |
| 411 | -0.828       | 3.214                          | NM_026872.1    |        | UBAP2      | ubiquitin associated protein 2                                  |
| 412 | -0.879       | 3.214                          | NM_009458.3    |        | UBE2B      | ubiquitin-conjugating enzyme E2B (RAD6 homolog)                 |
| 413 | 1.198        | 4.108                          | NM_019586      |        | UBE2J1     | ubiquitin-conjugating enzyme E2, J1 (UBC6 homolog, yeast)       |
| 414 | -0.776       | 3.214                          | NM_080562.2    |        | UBOX5      | U-box domain containing 5                                       |
| 415 | -0.862       | 4.108                          | NM_138668.1    |        | UFSP2      | UFM1-specific peptidase 2                                       |
| 416 | 1.127        | 4.108                          | XM_620754.3    |        | ULK3       | unc-51-like kinase 3 (C. elegans)                               |
| 417 | -0.814       | 2.708                          | NM_029012.1    |        | UNQ1887    | signal peptide peptidase 3                                      |
| 418 | 1.207        | 3.214                          | NM_021522.2    |        | USP14      | ubiquitin specific peptidase 14 (tRNA-guanine transglycosylase) |
| 419 | 1.289        | 1.01                           | NM_011909.1    |        | USP18      | ubiquitin specific peptidase 18                                 |
| 420 | 1.137        | 1.345                          | NM_144937.2    |        | USP3       | ubiquitin specific peptidase 3                                  |
| 421 | 1.188        | 4.108                          | AK082943       |        | USP33      | ubiquitin specific peptidase 33                                 |
| 422 | -0.818       | 0                              | NM_144826.2    |        | UTP6       | UTP6, small subunit (SSU) processome component, homolog (yeast) |
| 423 | 1.181        | 3.214                          | NM_009502      |        | VCL        | vinculin                                                        |
| 424 | 1.541        | 0                              | NM_009505.2    |        | VEGFA      | vascular endothelial growth factor A                            |
| 425 | 1.26         | 0                              | NM_013703.1    | D      | VLDLR      | very low density lipoprotein receptor                           |
| 426 | 1.213        | 0                              | NM_013703      | D      | VLDLR      | very low density lipoprotein receptor                           |
| 427 | 1.173        | 2.38                           | NM_022997      |        | VPS35      | vacuolar protein sorting 35 homolog (S. cerevisiae)             |

|     | A            | B                              | C             | D      | E          | F                                                     |
|-----|--------------|--------------------------------|---------------|--------|------------|-------------------------------------------------------|
| 1   | Fold Change* | False Discovery Rate (q-value) | ID†           | Notes‡ | Molecules§ | Description                                           |
| 428 | -0.573       | 4.108                          | NM_011709.2   |        | WAP        | whey acidic protein                                   |
| 429 | 1.153        | 0.633                          | NM_027057     |        | WDFY1      | WD repeat and FYVE domain containing 1                |
| 430 | -0.865       | 4.108                          | NM_177267.3   |        | WDR22      | WD repeat domain 22                                   |
| 431 | -0.789       | 0                              | NM_009525.2   |        | WNT5B      | wingless-type MMTV integration site family, member 5B |
| 432 | 1.174        | 3.214                          | NM_019653.2   |        | WSB1       | WD repeat and SOCS box-containing 1                   |
| 433 | -0.835       | 3.214                          | NM_133791.3   |        | WWC2       | WW and C2 domain containing 2                         |
| 434 | 1.131        | 2.127                          | NM_028198     |        | XPO5       | exportin 5                                            |
| 435 | -0.875       | 4.108                          | NM_009534.1   |        | YAP1       | Yes-associated protein 1, 65kDa                       |
| 436 | -0.848       | 2.38                           | NM_011732.1   |        | YBX1       | Y box binding protein 1                               |
| 437 | -0.804       | 4.108                          | NM_138303.1   |        | YIPF2      | Yip1 domain family, member 2                          |
| 438 | -0.891       | 2.38                           | XM_358776.1   |        | ZDHH8      | zinc finger, DHHC-type containing 8                   |
| 439 | -0.824       | 2.127                          | NM_007496.1   |        | ZFH3       | zinc finger homeobox 3                                |
| 440 | 1.191        | 2.708                          | NM_013844.1   |        | ZFP68      | zinc finger protein 68                                |
| 441 | -0.863       | 3.214                          | NM_146175.2   |        | ZNF282     | zinc finger protein 282                               |
| 442 | -0.907       | 4.108                          | NM_173769.2   |        | ZNF641     | zinc finger protein 641                               |
| 443 | 1.715        | 0.633                          | XM_359007.1   |        |            | This ID not mapped to the IPAKB                       |
| 444 | 1.432        | 0.633                          | XM_148611.1   |        |            | This ID not mapped to the IPAKB                       |
| 445 | 1.426        | 2.708                          | XM_356892.1   |        |            | This ID not mapped to the IPAKB                       |
| 446 | 1.337        | 1.01                           | XM_485210     |        |            | This ID not mapped to the IPAKB                       |
| 447 | 1.328        | 0                              | XM_147335.2   |        |            | This ID not mapped to the IPAKB                       |
| 448 | 1.287        | 0                              | NM_010156.2   |        |            | This ID not mapped to the IPAKB                       |
| 449 | 1.252        | 0                              | XM_355081.1   |        |            | This ID not mapped to the IPAKB                       |
| 450 | 1.242        | 3.214                          | XM_139474.1   |        |            | This ID not mapped to the IPAKB                       |
| 451 | 1.235        | 0                              | XM_124389.1   |        |            | This ID not mapped to the IPAKB                       |
| 452 | 1.234        | 4.108                          | XM_356224.1   |        |            | This ID not mapped to the IPAKB                       |
| 453 | 1.209        | 2.127                          | NM_020573.1   |        |            | This ID not mapped to the IPAKB                       |
| 454 | 1.2          | 2.38                           | XM_489186     |        |            | This ID not mapped to the IPAKB                       |
| 455 | 1.182        | 2.38                           | XM_356873.1   |        |            | This ID not mapped to the IPAKB                       |
| 456 | 1.156        | 2.127                          | XM_132529.2   |        |            | This ID not mapped to the IPAKB                       |
| 457 | 1.141        | 3.214                          | XM_283274.2   |        |            | This ID not mapped to the IPAKB                       |
| 458 | 1.134        | 4.108                          | C330006P03Rik |        |            | This ID not mapped to the IPAKB                       |
| 459 | 1.126        | 3.214                          | 9830115L13Rik |        |            | This ID not mapped to the IPAKB                       |
| 460 | 1.115        | 2.127                          | XM_130797.3   |        |            | This ID not mapped to the IPAKB                       |
| 461 | 1.114        | 1.345                          | XM_284356.2   |        |            | This ID not mapped to the IPAKB                       |
| 462 | -0.662       | 0.797                          | XM_354700     |        |            | This ID not mapped to the IPAKB                       |
| 463 | -0.718       | 3.214                          | XM_145698.4   |        |            | This ID not mapped to the IPAKB                       |
| 464 | -0.79        | 1.401                          | NM_012059.2   |        |            | This ID not mapped to the IPAKB                       |
| 465 | -0.82        | 2.127                          | XM_484355     |        |            | This ID not mapped to the IPAKB                       |
| 466 | -0.824       | 2.38                           | 1110003O08Rik |        |            | This ID not mapped to the IPAKB                       |
| 467 | -0.834       | 2.127                          | XM_148568.1   |        |            | This ID not mapped to the IPAKB                       |
| 468 | -0.834       | 2.127                          | XM_358661.1   |        |            | This ID not mapped to the IPAKB                       |

|     | A            | B                              | C             | D      | E          | F                               |
|-----|--------------|--------------------------------|---------------|--------|------------|---------------------------------|
| 1   | Fold Change* | False Discovery Rate (q-value) | ID†           | Notes‡ | Molecules§ | Description                     |
| 469 | -0.838       | 3.214                          | NM_177062.2   |        |            | This ID not mapped to the IPAKB |
| 470 | -0.845       | 2.38                           | XM_109767.2   |        |            | This ID not mapped to the IPAKB |
| 471 | -0.859       | 2.38                           | 9530083O12Rik |        |            | This ID not mapped to the IPAKB |
| 472 | -0.862       | 2.38                           | XM_195728.3   |        |            | This ID not mapped to the IPAKB |
| 473 | -0.863       | 3.214                          | NG_005838.1   |        |            | This ID not mapped to the IPAKB |
| 474 | -0.864       | 3.214                          | XM_150337.1   |        |            | This ID not mapped to the IPAKB |
| 475 | -0.867       | 1.401                          | XM_134183.4   |        |            | This ID not mapped to the IPAKB |
| 476 | -0.874       | 2.708                          | XM_489155     |        |            | This ID not mapped to the IPAKB |
| 477 | -0.874       | 2.127                          | XM_127605.4   |        |            | This ID not mapped to the IPAKB |
| 478 | -0.908       | 3.214                          | NG_005612.1   |        |            | This ID not mapped to the IPAKB |
| 479 | -0.924       | 4.108                          | XM_143254.3   |        |            | This ID not mapped to the IPAKB |
