# Supplementary material
Source: PubMed Central journal article supplement (PMC6314014)
Supplement: NIHMS999248-supplement-Supp_Table_4.pdf [file NIHMS999248-supplement-Supp_Table_4.pdf]

Supplemental Table 4. Mammary tumor transcripts differentially regulated by virulent sectional metastasis at  $Q < 0.05$ ,  $n = 66$  microarrays). The gene expression data from individual mammary tumor samples were ordered such that 25% (33 samples) of the total samples came from mice with no surface- or section- metastatic lesions and the longest tumor onset. Gene expression data from these 33 samples served as the reference group when paired with the gene expression data of 33 mammary tumor samples from mice that had the most sectional metastatic lesions detected (AMD66). Annotation was performed with Ingenuity Pathway Analysis Knowledge Base.

\*Positive fold change is significant fold change increase in gene expression from mammary tumors with virulent sectional metastasis relative to mammary tumors with no metastasis. Negative fold change is significant fold change increase in gene expression from mammary tumors with no metastasis relative to mammary tumors with virulent sectional metastasis.

†Identification of transcript by RefSeq or Illumina probe ID where RefSeq was not available.

‡Highlights significant transcripts that appear in duplicate due to the redundancy of transcript representation on Illumina Bead Chips.

§Official symbolic name of transcript

||Official descriptive name of transcript

|    | A            | B                              | C           | D      | E          | F                                                                             |
|----|--------------|--------------------------------|-------------|--------|------------|-------------------------------------------------------------------------------|
| 1  | Fold Change* | False Discovery Rate (q-value) | ID†         | Notes‡ | Molecules§ | Description                                                                   |
| 2  | -0.793       | 1.239                          | NM_007382   |        | ACADM      | acyl-Coenzyme A dehydrogenase, C-4 to C-12 straight chain                     |
| 3  | -0.82        | 2.422                          | NM_007393.1 |        | ACTB       | actin, beta                                                                   |
| 4  | -0.768       | 0                              | NM_175643.1 | D      | ADAMTS2    | ADAM metalloproteinase with thrombospondin type 1 motif, 2                    |
| 5  | -0.812       | 2.144                          | NM_175643.1 | D      | ADAMTS2    | ADAM metalloproteinase with thrombospondin type 1 motif, 2                    |
| 6  | -0.56        | 4.592                          | NM_009605.3 |        | ADIPOQ     | adiponectin, C1Q and collagen domain containing                               |
| 7  | -0.821       | 2.422                          | NM_009636.1 |        | AEBP1      | AE binding protein 1                                                          |
| 8  | -0.838       | 4.864                          | NM_025337.2 |        | AKR7A2     | aldo-keto reductase family 7, member A2 (aflatoxin aldehyde reductase)        |
| 9  | 1.246        | 0                              | NM_024204   |        | ANKRD22    | ankyrin repeat domain 22                                                      |
| 10 | -0.887       | 4.864                          | NM_011784.2 |        | APLNR      | apelin receptor                                                               |
| 11 | -0.81        | 0                              | NM_007470.1 |        | APOD       | apolipoprotein D                                                              |
| 12 | 1.255        | 1.845                          | NM_173743.2 |        | APOL9B     | apolipoprotein L 9b                                                           |
| 13 | 1.535        | 1.845                          | NM_007482   |        | ARG1       | arginase, liver                                                               |
| 14 | 1.268        | 0                              | NM_009705.1 |        | ARG2       | arginase, type II                                                             |
| 15 | -0.877       | 2.144                          | NM_008488.1 |        | ARHGEF1    | Rho guanine nucleotide exchange factor (GEF) 1                                |
| 16 | -0.828       | 3.131                          | NM_026369.1 |        | ARPC5      | actin related protein 2/3 complex, subunit 5, 16kDa                           |
| 17 | 1.453        | 0                              | NM_012055.1 |        | ASNS       | asparagine synthetase                                                         |
| 18 | 1.149        | 3.131                          | NM_022305.2 |        | B4GALT1    | UDP-Gal:betaGlcNAc beta 1,4- galactosyltransferase, polypeptide 1             |
| 19 | -0.791       | 0                              | NM_007542.3 |        | BGN        | biglycan                                                                      |
| 20 | 1.257        | 1.845                          | NM_010800.2 | D      | BHLHB8     | basic helix-loop-helix domain containing, class B, 8                          |
| 21 | 1.243        | 0.967                          | NM_010800.2 | D      | BHLHB8     | basic helix-loop-helix domain containing, class B, 8                          |
| 22 | -0.8         | 0                              | NM_031397.1 |        | BICC1      | bicaudal C homolog 1 (Drosophila)                                             |
| 23 | 1.183        | 4.592                          | NM_008528.3 |        | BLNK       | B-cell linker                                                                 |
| 24 | 1.246        | 0                              | NM_009761.2 |        | BNIP3L     | BCL2/adenovirus E1B 19kDa interacting protein 3-like                          |
| 25 | -0.85        | 2.422                          | NM_023336.2 |        | BRD3       | bromodomain containing 3                                                      |
| 26 | -0.76        | 4.864                          | NM_013483.1 |        | BTN1A1     | butyrophilin, subfamily 1, member A1                                          |
| 27 | 1.145        | 4.592                          | AK049325    | D      | C12ORF30   | chromosome 12 open reading frame 30                                           |
| 28 | 1.092        | 4.592                          | NM_172722   | D      | C12ORF30   | chromosome 12 open reading frame 30                                           |
| 29 | -0.86        | 4.864                          | NM_198609   |        | C15ORF15   | chromosome 15 open reading frame 15                                           |
| 30 | 1.12         | 3.406                          | NM_175287.2 |        | C1ORF174   | chromosome 1 open reading frame 174                                           |
| 31 | -0.793       | 0                              | NM_198860.1 |        | C22ORF36   | chromosome 22 open reading frame 36                                           |
| 32 | 1.114        | 4.592                          | NM_024495.2 |        | CA13       | carbonic anhydrase XIII                                                       |
| 33 | -0.757       | 0                              | NM_026439.1 |        | CCDC80     | coiled-coil domain containing 80                                              |
| 34 | -0.764       | 0                              | NM_010545.2 |        | CD74       | CD74 molecule, major histocompatibility complex, class II invariant chain     |
| 35 | 1.216        | 4.592                          | NM_007669.2 |        | CDKN1A     | cyclin-dependent kinase inhibitor 1A (p21, Cip1)                              |
| 36 | 1.128        | 4.864                          | NM_173370.3 |        | CDS1       | CDP-diacylglycerol synthase (phosphatidate cytidylyltransferase) 1            |
| 37 | -0.774       | 2.422                          | NM_009885.1 |        | CEL        | carboxyl ester lipase (bile salt-stimulated lipase)                           |
| 38 | -0.676       | 3.668                          | NM_017392   |        | CELSR2     | cadherin, EGF LAG seven-pass G-type receptor 2 (flamingo homolog, Drosophila) |
| 39 | -0.56        | 1.239                          | NM_013459.1 |        | CFD        | complement factor D (adipsin)                                                 |
| 40 | 1.45         | 0                              | NM_026929.2 |        | CHAC1      | ChaC, cation transport regulator homolog 1 (E. coli)                          |

|    | A            | B                              | C           | D      | E          | F                                                                 |
|----|--------------|--------------------------------|-------------|--------|------------|-------------------------------------------------------------------|
| 1  | Fold Change* | False Discovery Rate (q-value) | ID†         | Notes‡ | Molecules§ | Description                                                       |
| 41 | -0.876       | 3.406                          | NM_145979.1 |        | CHD4       | chromodomain helicase DNA binding protein 4                       |
| 42 | 1.179        | 3.406                          | NM_023543.1 |        | CHN2       | chimerin (chimaerin) 2                                            |
| 43 | -0.827       | 3.131                          | NM_007714.2 |        | CLK4       | CDC-like kinase 4                                                 |
| 44 | -0.91        | 3.406                          | NM_029738.1 |        | CLUAP1     | clusterin associated protein 1                                    |
| 45 | -0.709       | 2.144                          | NM_007742.2 |        | COL1A1     | collagen, type I, alpha 1                                         |
| 46 | -0.815       | 2.144                          | NM_015734.1 |        | COL5A1     | collagen, type V, alpha 1                                         |
| 47 | -0.755       | 0                              | NM_009933.1 | D      | COL6A1     | collagen, type VI, alpha 1                                        |
| 48 | -0.771       | 2.422                          | NM_009933.1 | D      | COL6A1     | collagen, type VI, alpha 1                                        |
| 49 | -0.839       | 4.864                          | NM_134002.1 |        | CSNK1G2    | casein kinase 1, gamma 2                                          |
| 50 | 1.311        | 4.592                          | NM_033616.2 |        | CSPRS      | component of Sp100-rs                                             |
| 51 | -0.8         | 0                              | NM_007802.2 |        | CTSK       | cathepsin K                                                       |
| 52 | 1.235        | 2.144                          | NM_022325.3 |        | CTSZ       | cathepsin Z                                                       |
| 53 | -0.876       | 3.131                          | NM_009987.2 |        | CX3CR1     | chemokine (C-X3-C motif) receptor 1                               |
| 54 | -0.711       | 2.422                          | NM_007833.1 |        | DCN        | decorin                                                           |
| 55 | 1.327        | 1.845                          | NM_029083.1 |        | DDIT4      | DNA-damage-inducible transcript 4                                 |
| 56 | -0.864       | 2.422                          | NM_022563.2 |        | DDR2       | discoidin domain receptor tyrosine kinase 2                       |
| 57 | -0.849       | 1.845                          | NM_015814.2 |        | DKK3       | dickkopf homolog 3 ( <i>Xenopus laevis</i> )                      |
| 58 | 1.18         | 2.144                          | NM_007904.2 |        | EDNRB      | endothelin receptor type B                                        |
| 59 | -0.829       | 1.845                          | NM_028889.1 |        | EFHD1      | EF-hand domain family, member D1                                  |
| 60 | 1.143        | 3.131                          | NM_010107.2 |        | EFNA1      | ephrin-A1                                                         |
| 61 | 1.704        | 0                              | NM_028133.1 |        | EGLN3      | egl nine homolog 3 ( <i>C. elegans</i> )                          |
| 62 | -0.866       | 3.668                          | NM_146200   |        | EIF3C      | eukaryotic translation initiation factor 3, subunit C             |
| 63 | -0.725       | 0                              | NM_007925.2 |        | ELN        | elastin (supravalvular aortic stenosis, Williams-Beuren syndrome) |
| 64 | -0.819       | 3.131                          | NM_080595.1 |        | EMID1      | EMI domain containing 1                                           |
| 65 | -0.874       | 3.131                          | NM_010129.1 |        | EMP3       | epithelial membrane protein 3                                     |
| 66 | 1.255        | 2.144                          | NM_023119   |        | ENO1       | enolase 1, (alpha)                                                |
| 67 | -0.808       | 0                              | NM_010169.2 |        | F2R        | coagulation factor II (thrombin) receptor                         |
| 68 | -0.886       | 4.592                          | NM_024170   |        | FAM127C    | family with sequence similarity 127, member C                     |
| 69 | -0.865       | 3.406                          | NM_023605.1 |        | FBXO9      | F-box protein 9                                                   |
| 70 | -0.795       | 2.144                          | NM_010189   |        | FCGRT      | Fc fragment of IgG, receptor, transporter, alpha                  |
| 71 | 1.169        | 4.592                          | NM_146054.1 |        | FERMT2     | fermitin family homolog 2 ( <i>Drosophila</i> )                   |
| 72 | -0.86        | 2.422                          | NM_153573.1 |        | FKBP14     | FK506 binding protein 14, 22 kDa                                  |
| 73 | 1.197        | 0                              | NM_010220.2 |        | FKBP5      | FK506 binding protein 5                                           |
| 74 | -0.831       | 4.592                          | NM_008028.1 |        | FLOT2      | flotillin 2                                                       |
| 75 | -0.855       | 3.131                          | XM_129845.3 |        | FN1        | fibronectin 1                                                     |
| 76 | -0.789       | 1.845                          | NM_008047.2 |        | FSTL1      | follicle-stimulating-like 1                                       |
| 77 | 1.263        | 2.144                          | NM_008084.1 | D      | GAPDH      | glyceraldehyde-3-phosphate dehydrogenase                          |
| 78 | 1.225        | 0                              | NM_008084.2 | D      | GAPDH      | glyceraldehyde-3-phosphate dehydrogenase                          |
| 79 | 1.373        | 0                              | NM_010288.2 |        | GJA1       | gap junction protein, alpha 1, 43kDa                              |
| 80 | 1.173        | 0.967                          | NM_015828   |        | GNE        | glucosamine (UDP-N-acetyl)-2-epimerase/N-acetylmannosamine kinase |
| 81 | -0.864       | 4.864                          | NM_175193.2 |        | GOLIM4     | golgi integral membrane protein 4                                 |

|     | A            | B                              | C           | D      | E          | F                                                                                                                                    |
|-----|--------------|--------------------------------|-------------|--------|------------|--------------------------------------------------------------------------------------------------------------------------------------|
| 1   | Fold Change* | False Discovery Rate (q-value) | ID†         | Notes‡ | Molecules§ | Description                                                                                                                          |
| 82  | -0.835       | 4.592                          | NM_016696.1 |        | GPC1       | glypican 1                                                                                                                           |
| 83  | 1.174        | 0                              | NM_173866.1 |        | GPT2       | glutamic pyruvate transaminase (alanine aminotransferase) 2                                                                          |
| 84  | -0.884       | 3.131                          | NM_027127.1 |        | GPX8       | glutathione peroxidase 8                                                                                                             |
| 85  | -0.806       | 0                              | NM_145558   |        | HADHB      | hydroxyacyl-Coenzyme A dehydrogenase/3-ketoacyl-Coenzyme A thiolase/enoyl-Coenzyme A hydratase (trifunctional protein), beta subunit |
| 86  | 1.192        | 0                              | NM_178192.1 |        | HIST1H4F   | histone cluster 1, H4f                                                                                                               |
| 87  | 1.202        | 4.592                          | NM_175655.1 |        | HIST1H4I   | histone cluster 1, H4i                                                                                                               |
| 88  | 1.173        | 0                              | NM_178211.1 | D      | HIST4H4    | histone cluster 4, H4                                                                                                                |
| 89  | 1.165        | 4.592                          | NM_178210.1 | D      | HIST4H4    | histone cluster 4, H4                                                                                                                |
| 90  | 1.329        | 0                              | NM_013820.1 |        | HK2        | hexokinase 2                                                                                                                         |
| 91  | -0.736       | 1.239                          | NM_207105.1 | D      | HLA-DQB2   | major histocompatibility complex, class II, DQ beta 2                                                                                |
| 92  | -0.74        | 1.239                          | NM_010379.2 | D      | HLA-DQB2   | major histocompatibility complex, class II, DQ beta 2                                                                                |
| 93  | -0.711       | 0                              | NM_182650.2 |        | HNRNPA2B1  | heterogeneous nuclear ribonucleoprotein A2/B1                                                                                        |
| 94  | 1.186        | 0.967                          | NM_152134.1 | D      | HOMER1     | homer homolog 1 (Drosophila)                                                                                                         |
| 95  | 1.171        | 0.967                          | NM_152134.1 | D      | HOMER1     | homer homolog 1 (Drosophila)                                                                                                         |
| 96  | -0.806       | 1.239                          | NM_017370.1 |        | HPR        | haptoglobin-related protein                                                                                                          |
| 97  | -0.808       | 1.845                          | NM_008288   |        | HSD11B1    | hydroxysteroid (11-beta) dehydrogenase 1                                                                                             |
| 98  | -0.749       | 3.131                          | NM_008302.2 | D      | HSP90AB1   | heat shock protein 90kDa alpha (cytosolic), class B member 1                                                                         |
| 99  | -0.824       | 3.406                          | NM_008302.2 | D      | HSP90AB1   | heat shock protein 90kDa alpha (cytosolic), class B member 1                                                                         |
| 100 | -0.829       | 3.406                          | NM_008305.2 |        | HSPG2      | heparan sulfate proteoglycan 2                                                                                                       |
| 101 | 1.48         | 0                              | NM_025378.1 | D      | IFITM3     | interferon induced transmembrane protein 3 (1-8U)                                                                                    |
| 102 | 1.448        | 0.967                          | NM_025378.1 | D      | IFITM3     | interferon induced transmembrane protein 3 (1-8U)                                                                                    |
| 103 | -0.641       | 3.668                          | XM_132633.4 |        | IGK        | immunoglobulin kappa chain complex                                                                                                   |
| 104 | -0.844       | 2.422                          | XM_194109.2 |        | IGSF3      | immunoglobulin superfamily, member 3                                                                                                 |
| 105 | -0.751       | 2.144                          | NM_010549.1 |        | IL11RA     | interleukin 11 receptor, alpha                                                                                                       |
| 106 | -0.8         | 1.239                          | NM_008361   |        | IL1B       | interleukin 1, beta                                                                                                                  |
| 107 | -0.881       | 4.592                          | NM_182784.1 |        | IQSEC1     | IQ motif and Sec7 domain 1                                                                                                           |
| 108 | 1.253        | 0                              | XM_194279   |        | JMJD1A     | jumonji domain containing 1A                                                                                                         |
| 109 | -0.839       | 4.592                          | NM_008416.1 |        | JUNB       | jun B proto-oncogene                                                                                                                 |
| 110 | -0.905       | 3.131                          | NM_145611   |        | KANK2      | KN motif and ankyrin repeat domains 2                                                                                                |
| 111 | -0.855       | 2.422                          | NM_172872.2 |        | KANK4      | KN motif and ankyrin repeat domains 4                                                                                                |
| 112 | -0.838       | 4.864                          | XM_133614.4 |        | KCTD14     | potassium channel tetramerisation domain containing 14                                                                               |
| 113 | 1.158        | 1.845                          | NM_028791.3 |        | KIAA0082   | KIAA0082                                                                                                                             |
| 114 | -0.707       | 1.239                          | NM_020568.1 |        | KIAA1881   | KIAA1881                                                                                                                             |
| 115 | -0.853       | 0                              | XM_358544.1 |        | KIF1A      | kinesin family member 1A                                                                                                             |
| 116 | -0.878       | 2.422                          | NM_007905.1 |        | LOC653441  | similar to polyhomeotic 1-like                                                                                                       |
| 117 | -0.78        | 0                              | NM_010729.2 |        | LOXL1      | lysyl oxidase-like 1                                                                                                                 |
| 118 | -0.704       | 1.239                          | NM_029796.2 |        | LRG1       | leucine-rich alpha-2-glycoprotein 1                                                                                                  |
| 119 | -0.873       | 2.144                          | NM_177152.4 |        | LRIG3      | leucine-rich repeats and immunoglobulin-like domains 3                                                                               |
| 120 | -0.746       | 0                              | XM_358823.1 |        | LRRC15     | leucine rich repeat containing 15                                                                                                    |
| 121 | 1.174        | 3.406                          | NM_025948.1 |        | LSM14A     | LSM14A, SCD6 homolog A (S. cerevisiae)                                                                                               |

|     | A            | B                              | C           | D      | E           | F                                                                                                    |
|-----|--------------|--------------------------------|-------------|--------|-------------|------------------------------------------------------------------------------------------------------|
| 1   | Fold Change* | False Discovery Rate (q-value) | ID†         | Notes‡ | Molecules§  | Description                                                                                          |
| 122 | -0.788       | 3.131                          | NM_010741   |        | LY6C1       | lymphocyte antigen 6 complex, locus C1                                                               |
| 123 | -0.869       | 4.864                          | NM_008567.1 |        | MCM6        | minichromosome maintenance complex component 6                                                       |
| 124 | -0.843       | 1.239                          | NM_015776   |        | MFAP5       | microfibrillar associated protein 5                                                                  |
| 125 | -0.76        | 0                              | NM_012022.1 |        | MGI:1349458 | per-pentamer repeat gene                                                                             |
| 126 | -0.701       | 1.239                          | NM_008597.2 |        | MGP         | matrix Gla protein                                                                                   |
| 127 | -0.761       | 2.144                          | NM_026178.2 |        | MMD         | monocyte to macrophage differentiation-associated                                                    |
| 128 | -0.73        | 0                              | NM_008610.1 |        | MMP2        | matrix metalloproteinase 2 (gelatinase A, 72kDa gelatinase, 72kDa type IV collagenase)               |
| 129 | -0.83        | 3.406                          | NM_028722.1 |        | MSL-1       | male-specific lethal-1 homolog                                                                       |
| 130 | -0.83        | 1.239                          | NM_010833.1 |        | MSN         | moesin                                                                                               |
| 131 | -0.833       | 4.592                          | NM_013827.1 |        | MTF2        | metal response element binding transcription factor 2                                                |
| 132 | 1.168        | 0                              | NM_172308.2 |        | MTHFD1L     | methylenetetrahydrofolate dehydrogenase (NADP+ dependent) 1-like                                     |
| 133 | 1.378        | 0                              | NM_008638   |        | MTHFD2      | methylenetetrahydrofolate dehydrogenase (NADP+ dependent) 2, methenyltetrahydrofolate cyclohydrolase |
| 134 | 1.265        | 2.144                          | NM_013606   |        | MX1         | myxovirus (influenza virus) resistance 1, interferon-inducible protein p78 (mouse)                   |
| 135 | 1.185        | 0.967                          | NM_021524.1 |        | NAMPT       | nicotinamide phosphoribosyltransferase                                                               |
| 136 | -0.849       | 3.131                          | NM_010882.2 |        | NDN         | necdin homolog (mouse)                                                                               |
| 137 | 1.361        | 0.967                          | NM_008681   |        | NDRG1       | N-myc downstream regulated gene 1                                                                    |
| 138 | -0.784       | 1.239                          | NM_010906.1 |        | NFIX        | nuclear factor I/X (CCAAT-binding transcription factor)                                              |
| 139 | -0.847       | 2.144                          | NM_010917.1 |        | NID1        | nidogen 1                                                                                            |
| 140 | -0.855       | 3.131                          | NM_008737.1 | D      | NRP1        | neuropilin 1                                                                                         |
| 141 | -0.883       | 3.406                          | NM_008737.1 | D      | NRP1        | neuropilin 1                                                                                         |
| 142 | -0.865       | 2.144                          | NM_008740.2 |        | NSF         | N-ethylmaleimide-sensitive factor                                                                    |
| 143 | -0.831       | 0                              | NM_008788.1 |        | PCOLCE      | procollagen C-endopeptidase enhancer                                                                 |
| 144 | -0.836       | 0                              | AK011999    |        | PDE4B       | phosphodiesterase 4B, cAMP-specific (phosphodiesterase E4 dunce homolog, Drosophila)                 |
| 145 | -0.803       | 0                              | NM_011058.1 |        | PDGFRA      | platelet-derived growth factor receptor, alpha polypeptide                                           |
| 146 | 1.174        | 0.967                          | NM_008827.2 |        | PGF         | placental growth factor                                                                              |
| 147 | 1.429        | 0                              | NM_008828   |        | PGK1        | phosphoglycerate kinase 1                                                                            |
| 148 | 1.694        | 0                              | NM_008843.1 |        | PIP         | prolactin-induced protein                                                                            |
| 149 | -0.844       | 3.668                          | NM_011962.2 |        | PLOD3       | procollagen-lysine, 2-oxoglutarate 5-dioxygenase 3                                                   |
| 150 | -0.785       | 0                              | NM_011101.3 |        | PRKCA       | protein kinase C, alpha                                                                              |
| 151 | -0.883       | 3.131                          | XM_131444.4 |        | PRPF4       | PRP4 pre-mRNA processing factor 4 homolog (yeast)                                                    |
| 152 | -0.809       | 2.422                          | NM_028195   |        | PSCD4       | pleckstrin homology, Sec7 and coiled-coil domains 4                                                  |
| 153 | -0.846       | 4.864                          | XM_355811   |        | PTMS        | parathyrosin                                                                                         |
| 154 | -0.81        | 0                              | NM_008997.1 |        | RAB11B      | RAB11B, member RAS oncogene family                                                                   |
| 155 | -0.821       | 1.239                          | NM_178045.3 | D      | RASSF4      | Ras association (RalGDS/AF-6) domain family member 4                                                 |
| 156 | -0.838       | 2.144                          | NM_178045.3 | D      | RASSF4      | Ras association (RalGDS/AF-6) domain family member 4                                                 |
| 157 | -0.816       | 2.422                          | NM_009031.2 |        | RBBP7       | retinoblastoma binding protein 7                                                                     |
| 158 | 1.171        | 0                              | NM_178608.2 |        | REEP1       | receptor accessory protein 1                                                                         |

|     | A            | B                              | C           | D      | E          | F                                                                                                      |
|-----|--------------|--------------------------------|-------------|--------|------------|--------------------------------------------------------------------------------------------------------|
| 1   | Fold Change* | False Discovery Rate (q-value) | ID†         | Notes‡ | Molecules§ | Description                                                                                            |
| 159 | -0.828       | 0                              | NM_007874.2 |        | REEP5      | receptor accessory protein 5                                                                           |
| 160 | 1.187        | 0.967                          | NM_139292.1 |        | REEP6      | receptor accessory protein 6                                                                           |
| 161 | 1.143        | 4.592                          | XM_128488.3 |        | RGS11      | regulator of G-protein signaling 11                                                                    |
| 162 | 1.511        | 2.144                          | NR_003278.1 |        | RN18S      | 18S RNA                                                                                                |
| 163 | -0.859       | 3.668                          | NM_013876.2 |        | RNF11      | ring finger protein 11                                                                                 |
| 164 | -0.853       | 1.239                          | NM_022891.1 |        | RPL23      | ribosomal protein L23                                                                                  |
| 165 | 1.16         | 4.864                          | NM_011297.2 |        | RPS24      | ribosomal protein S24                                                                                  |
| 166 | 1.406        | 3.131                          | NM_021384.2 |        | RSAD2      | radical S-adenosyl methionine domain containing 2                                                      |
| 167 | -0.847       | 3.131                          | NM_153790.1 |        | SCARF2     | scavenger receptor class F, member 2                                                                   |
| 168 | -0.725       | 0                              | NM_011325.1 |        | SCNN1B     | sodium channel, nonvoltage-gated 1, beta (Liddle syndrome)                                             |
| 169 | -0.67        | 0                              | NM_011340.2 |        | SERPINF1   | serpin peptidase inhibitor, clade F (alpha-2 antiplasmin, pigment epithelium derived factor), member 1 |
| 170 | -0.838       | 2.144                          | NM_030261   |        | SESN3      | sestrin 3                                                                                              |
| 171 | -0.808       | 3.131                          | NM_009186   |        | SFRS10     | splicing factor, arginine/serine-rich 10 (transformer 2 homolog, Drosophila)                           |
| 172 | -0.804       | 1.845                          | NM_172755.2 |        | SFRS14     | splicing factor, arginine/serine-rich 14                                                               |
| 173 | -0.88        | 3.406                          | NM_024480.2 |        | SH3BP5L    | SH3-binding domain protein 5-like                                                                      |
| 174 | 1.321        | 0                              | NM_018861.2 |        | SLC1A4     | solute carrier family 1 (glutamate/neutral amino acid transporter), member 4                           |
| 175 | -0.836       | 4.592                          | NM_153150.1 |        | SLC25A1    | solute carrier family 25 (mitochondrial carrier; citrate transporter), member 1                        |
| 176 | 1.383        | 0                              | NM_011400.1 |        | SLC2A1     | solute carrier family 2 (facilitated glucose transporter), member 1                                    |
| 177 | -0.902       | 4.592                          | NM_021435.1 |        | SLC35B4    | solute carrier family 35, member B4                                                                    |
| 178 | -0.871       | 4.592                          | AK019479    |        | SLIT3      | slit homolog 3 (Drosophila)                                                                            |
| 179 | -0.838       | 3.668                          | NM_022315.1 |        | SMOC2      | SPARC related modular calcium binding 2                                                                |
| 180 | 1.196        | 3.406                          | NM_011451.1 |        | SPHK1      | sphingosine kinase 1                                                                                   |
| 181 | -0.883       | 3.406                          | NM_029035.2 |        | SPSB1      | splA/ryanodine receptor domain and SOCS box containing 1                                               |
| 182 | 1.16         | 0                              | NM_153091.2 |        | ST7L       | suppression of tumorigenicity 7 like                                                                   |
| 183 | -0.805       | 3.406                          | NM_009368.1 |        | TGFB3      | transforming growth factor, beta 3                                                                     |
| 184 | -0.88        | 3.668                          | XM_129857.4 |        | TGFBRAP1   | transforming growth factor, beta receptor associated protein 1                                         |
| 185 | -0.8         | 1.845                          | NM_009382.2 |        | THY1       | Thy-1 cell surface antigen                                                                             |
| 186 | -0.783       | 0                              | NM_011593   |        | TIMP1      | TIMP metalloproteinase inhibitor 1                                                                     |
| 187 | -0.767       | 1.845                          | NM_009388.2 |        | TKT        | transketolase (Wernicke-Korsakoff syndrome)                                                            |
| 188 | -0.855       | 1.239                          | NM_133804.1 |        | TMEM132A   | transmembrane protein 132A                                                                             |
| 189 | 1.196        | 2.144                          | NM_009415.1 |        | TPI1       | triosephosphate isomerase 1                                                                            |
| 190 | -0.63        | 2.422                          | NM_022314   |        | TPM3       | tropomyosin 3                                                                                          |
| 191 | 1.321        | 0                              | NM_144554.1 |        | TRIB3      | tribbles homolog 3 (Drosophila)                                                                        |
| 192 | -0.859       | 3.668                          | NM_030706.1 |        | TRIM2      | tripartite motif-containing 2                                                                          |
| 193 | 1.289        | 3.131                          | NM_011909.1 |        | USP18      | ubiquitin specific peptidase 18                                                                        |
| 194 | -0.83        | 1.239                          | NM_144826.2 |        | UTP6       | UTP6, small subunit (SSU) processome component, homolog (yeast)                                        |
| 195 | 1.592        | 0                              | NM_009505.2 |        | VEGFA      | vascular endothelial growth factor A                                                                   |

|     | A            | B                              | C             | D      | E          | F                                                     |
|-----|--------------|--------------------------------|---------------|--------|------------|-------------------------------------------------------|
| 1   | Fold Change* | False Discovery Rate (q-value) | ID†           | Notes‡ | Molecules§ | Description                                           |
| 196 | 1.251        | 0                              | NM_013703.1   | D      | VLDLR      | very low density lipoprotein receptor                 |
| 197 | 1.185        | 0                              | NM_013703     | D      | VLDLR      | very low density lipoprotein receptor                 |
| 198 | -0.563       | 4.864                          | NM_011709.2   |        | WAP        | whey acidic protein                                   |
| 199 | -0.823       | 2.144                          | NM_009525.2   |        | WNT5B      | wingless-type MMTV integration site family, member 5B |
| 200 | -0.838       | 4.592                          | NM_007496.1   |        | ZFH3       | zinc finger homeobox 3                                |
| 201 | 1.497        | 0                              | 2610528A11Rik |        |            | This ID not mapped to the IPAKB                       |
| 202 | 1.347        | 0.967                          | XM_147335.2   |        |            | This ID not mapped to the IPAKB                       |
| 203 | 1.303        | 3.131                          | XM_356224.1   |        |            | This ID not mapped to the IPAKB                       |
| 204 | 1.118        | 2.144                          | XM_284356.2   |        |            | This ID not mapped to the IPAKB                       |
| 205 | -0.518       | 0                              | XM_354700     |        |            | This ID not mapped to the IPAKB                       |
| 206 | -0.682       | 0                              | XM_354700     |        |            | This ID not mapped to the IPAKB                       |
| 207 | -0.808       | 4.864                          | NM_012059.2   |        |            | This ID not mapped to the IPAKB                       |
| 208 | -0.815       | 2.144                          | XM_484355     |        |            | This ID not mapped to the IPAKB                       |
| 209 | -0.83        | 3.668                          | 1110003O08Rik |        |            | This ID not mapped to the IPAKB                       |
| 210 | -0.836       | 2.422                          | XM_358661.1   |        |            | This ID not mapped to the IPAKB                       |
| 211 | -0.851       | 2.144                          | 9530083O12Rik |        |            | This ID not mapped to the IPAKB                       |
| 212 | -0.869       | 2.144                          | XM_134183.4   |        |            | This ID not mapped to the IPAKB                       |
| 213 | -0.871       | 3.406                          | XM_489155     |        |            | This ID not mapped to the IPAKB                       |
| 214 |              |                                |               |        |            |                                                       |
| 215 |              |                                |               |        |            |                                                       |
| 216 |              |                                |               |        |            |                                                       |
| 217 |              |                                |               |        |            |                                                       |
| 218 |              |                                |               |        |            |                                                       |
| 219 |              |                                |               |        |            |                                                       |
| 220 |              |                                |               |        |            |                                                       |
| 221 |              |                                |               |        |            |                                                       |
| 222 |              |                                |               |        |            |                                                       |
| 223 |              |                                |               |        |            |                                                       |
| 224 |              |                                |               |        |            |                                                       |
| 225 |              |                                |               |        |            |                                                       |
| 226 |              |                                |               |        |            |                                                       |
