# Supplementary material
Source: PubMed Central journal article supplement (PMC6314014)
Supplement: NIHMS999248-supplement-Supp_Table_5.pdf [file NIHMS999248-supplement-Supp_Table_5.pdf]

Supplemental Table 5. Biological functions of mammary tumor transcripts of significant differential expression by metastasis (MET66 and AMD66,  $Q < 0.05$ ,  $n = 66$  microarrays). The gene expression data from individual mammary tumor samples were ordered such that 25% (33 samples) of the total samples came from mice with no surface- or section- metastatic lesions and the longest tumor onset. Gene expression data from these 33 samples served as the reference group when paired with the gene expression data of 33 mammary tumor samples from mice that had the most sectional metastatic lesions detected (AMD66), and when paired with the gene expression data of 33 mammary tumor samples from mice that had the most superficial metastatic lesions detected (MET66). Annotation was performed with Ingenuity Pathway Analysis Knowledge Base.

\*categories of biological functions as defined by Ingenuity Pathway Analysis Knowledge Base

†P-value describing the probability that the molecules of Supplemental Tables 3 and 4 associate with a biological function category due to chance

‡Number of molecules associated with function

|    | A                                            | B        | C            |
|----|----------------------------------------------|----------|--------------|
| 1  | Function Annotation*                         | P-value† | # Molecules‡ |
| 2  | experimentally-induced diabetes              | 1.58E-06 | 12           |
| 3  | neoplasia                                    | 2.34E-06 | 98           |
| 4  | cancer                                       | 5.68E-06 | 93           |
| 5  | developmental process of bone                | 6.31E-06 | 18           |
| 6  | acinar-cell carcinoma                        | 9.76E-06 | 6            |
| 7  | migration of endothelial cells               | 1.06E-05 | 16           |
| 8  | neovascularization of organ                  | 1.09E-05 | 5            |
| 9  | neovascularization                           | 1.42E-05 | 11           |
| 10 | tumorigenesis                                | 1.62E-05 | 101          |
| 11 | proliferation of connective tissue cells     | 1.82E-05 | 20           |
| 12 | acute allergic pulmonary eosinophilia        | 2.27E-05 | 6            |
| 13 | connective tissue disorder                   | 2.75E-05 | 39           |
| 14 | skeletal and muscular disorder               | 2.93E-05 | 46           |
| 15 | primary tumor                                | 3.05E-05 | 71           |
| 16 | growth of cells                              | 3.51E-05 | 72           |
| 17 | tumor                                        | 3.69E-05 | 76           |
| 18 | atherosclerosis                              | 4.09E-05 | 14           |
| 19 | neovascularization of eye                    | 4.55E-05 | 4            |
| 20 | developmental process of connective tissue   | 5.94E-05 | 18           |
| 21 | diabetes                                     | 6.31E-05 | 22           |
| 22 | proliferation of cells                       | 6.40E-05 | 87           |
| 23 | migration of microvascular endothelial cells | 6.51E-05 | 5            |
| 24 | vascularization of eye                       | 7.44E-05 | 4            |
| 25 | carcinoma                                    | 7.84E-05 | 54           |
| 26 | malignant tumor                              | 8.92E-05 | 67           |
| 27 | angiogenesis                                 | 1.01E-04 | 20           |
| 28 | choroidal neovascularization                 | 1.13E-04 | 5            |
| 29 | degradation of protein                       | 1.18E-04 | 21           |
| 30 | development of bone                          | 1.22E-04 | 11           |
| 31 | systemic sclerosis                           | 1.29E-04 | 6            |
| 32 | infiltration of eukaryotic cells             | 1.39E-04 | 18           |
| 33 | quantity of essential amino acids            | 1.68E-04 | 4            |
| 34 | inflammatory disorder                        | 1.87E-04 | 54           |
| 35 | death of mice                                | 2.08E-04 | 43           |
| 36 | cell death                                   | 2.18E-04 | 94           |
| 37 | rheumatic disease                            | 2.24E-04 | 33           |
| 38 | vascularization                              | 2.38E-04 | 12           |
| 39 | metabolic disorder                           | 2.39E-04 | 42           |
| 40 | infiltration of cells                        | 2.40E-04 | 18           |
| 41 | developmental process of tissue              | 2.42E-04 | 39           |
| 42 | pancreatic tumor                             | 2.54E-04 | 12           |
| 43 | cell death of epithelial cells               | 2.84E-04 | 14           |
| 44 | heart failure of mice                        | 2.98E-04 | 6            |
| 45 | death of animal                              | 3.10E-04 | 44           |
| 46 | death of rodents                             | 3.15E-04 | 43           |
| 47 | development of blood vessel                  | 3.52E-04 | 22           |
| 48 | cardiovascular disorder                      | 3.77E-04 | 37           |
| 49 | development of vessel                        | 3.78E-04 | 22           |
| 50 | arthritis                                    | 3.86E-04 | 30           |
| 51 | inflammatory arthropathy                     | 3.86E-04 | 30           |
| 52 | immunological disorder                       | 3.96E-04 | 42           |
| 53 | death of mammalia                            | 4.06E-04 | 43           |
| 54 | hematological disorder                       | 4.20E-04 | 39           |
| 55 | healing                                      | 4.39E-04 | 9            |
| 56 | cell movement of cells                       | 4.78E-04 | 41           |
| 57 | dermatological disorder                      | 4.87E-04 | 29           |

|     | A                                                        | B        | C            |
|-----|----------------------------------------------------------|----------|--------------|
| 1   | Function Annotation*                                     | P-value† | # Molecules‡ |
| 58  | apoptosis of epithelial cells                            | 5.01E-04 | 13           |
| 59  | dilation of left ventricle                               | 5.09E-04 | 5            |
| 60  | Kawasaki's disease                                       | 5.18E-04 | 3            |
| 61  | development of gastrointestinal tract                    | 5.18E-04 | 3            |
| 62  | binding of cells                                         | 5.26E-04 | 27           |
| 63  | developmental process of endothelial cells               | 5.33E-04 | 10           |
| 64  | formation of vessel                                      | 5.50E-04 | 7            |
| 65  | apoptosis of bone marrow stromal cells                   | 6.36E-04 | 2            |
| 66  | binding of bone marrow stromal cells                     | 6.36E-04 | 2            |
| 67  | cell division process of colon carcinoma cells           | 6.36E-04 | 2            |
| 68  | deposition of granulation tissue                         | 6.36E-04 | 2            |
| 69  | development of endocardium                               | 6.36E-04 | 2            |
| 70  | development of vascular plexus                           | 6.36E-04 | 2            |
| 71  | formation of cord blood                                  | 6.36E-04 | 2            |
| 72  | interphase of colon carcinoma cells                      | 6.36E-04 | 2            |
| 73  | morphology of collagen fibrils                           | 6.36E-04 | 2            |
| 74  | nonproliferative diabetic retinopathy with macular edema | 6.36E-04 | 2            |
| 75  | quantity of cobblestone area-forming cells               | 6.36E-04 | 2            |
| 76  | quantity of osteoprogenitor cells                        | 6.36E-04 | 2            |
| 77  | regeneration of glomerular capillary                     | 6.36E-04 | 2            |
| 78  | proteolysis                                              | 6.83E-04 | 14           |
| 79  | mucoepidermoid carcinoma                                 | 6.87E-04 | 6            |
| 80  | angiogenesis of blood vessel                             | 6.90E-04 | 13           |
| 81  | apoptosis                                                | 7.00E-04 | 81           |
| 82  | growth of tumor                                          | 7.51E-04 | 12           |
| 83  | failure of mice                                          | 7.53E-04 | 7            |
| 84  | proliferation of muscle cells                            | 7.64E-04 | 13           |
| 85  | apoptosis of myoblasts                                   | 8.13E-04 | 3            |
| 86  | choroidal neovascularization of eye                      | 8.13E-04 | 3            |
| 87  | entry into cell division process of sarcoma cells        | 8.13E-04 | 3            |
| 88  | genital tumor                                            | 8.15E-04 | 22           |
| 89  | infiltration of phagocytes                               | 8.43E-04 | 11           |
| 90  | cell movement                                            | 8.51E-04 | 41           |
| 91  | quantity of connective tissue cells                      | 8.59E-04 | 10           |
| 92  | adenocarcinoma                                           | 8.73E-04 | 16           |
| 93  | parotid gland tumor                                      | 8.80E-04 | 6            |
| 94  | salivary gland tumor                                     | 8.80E-04 | 6            |
| 95  | cell-cell adhesion of cell lines                         | 9.24E-04 | 4            |
| 96  | binding of eukaryotic cells                              | 9.94E-04 | 25           |
| 97  | vascular lesion                                          | 1.02E-03 | 9            |
| 98  | invasion of eukaryotic cells                             | 1.03E-03 | 23           |
| 99  | respiratory disorder                                     | 1.10E-03 | 27           |
| 100 | migration of tumor cells                                 | 1.11E-03 | 7            |
| 101 | development of neural tube                               | 1.11E-03 | 6            |
| 102 | migration of cancer cells                                | 1.11E-03 | 6            |
| 103 | oral cancer                                              | 1.11E-03 | 6            |
| 104 | cell movement of eukaryotic cells                        | 1.13E-03 | 36           |
| 105 | growth of sarcoma cells                                  | 1.15E-03 | 4            |
| 106 | vascularization of tumor                                 | 1.15E-03 | 4            |
| 107 | cardiovascular process of blood vessel                   | 1.16E-03 | 15           |
| 108 | cell death of eukaryotic cells                           | 1.18E-03 | 77           |
| 109 | heart failure                                            | 1.18E-03 | 10           |
| 110 | damage of cartilage tissue                               | 1.20E-03 | 3            |
| 111 | movement of tumor cells                                  | 1.22E-03 | 7            |
| 112 | release of nitric oxide                                  | 1.22E-03 | 7            |

|     | A                                                          | B        | C            |
|-----|------------------------------------------------------------|----------|--------------|
| 1   | Function Annotation*                                       | P-value† | # Molecules‡ |
| 113 | movement of cancer cells                                   | 1.24E-03 | 6            |
| 114 | proliferation of fibroblasts                               | 1.28E-03 | 12           |
| 115 | differentiation of endothelial cells                       | 1.32E-03 | 5            |
| 116 | healing of lesion                                          | 1.33E-03 | 7            |
| 117 | binding of tumor cell lines                                | 1.37E-03 | 13           |
| 118 | developmental process of neural tube                       | 1.39E-03 | 6            |
| 119 | development of connective tissue                           | 1.40E-03 | 11           |
| 120 | edema of lung                                              | 1.41E-03 | 4            |
| 121 | arrest in cell cycle progression of eukaryotic cells       | 1.48E-03 | 12           |
| 122 | pancreatic cancer                                          | 1.50E-03 | 13           |
| 123 | dilation of heart ventricle                                | 1.52E-03 | 5            |
| 124 | eosinophilia                                               | 1.59E-03 | 7            |
| 125 | proliferation of smooth muscle cells                       | 1.65E-03 | 11           |
| 126 | aneurysm                                                   | 1.68E-03 | 3            |
| 127 | contraction of fibroblasts                                 | 1.68E-03 | 3            |
| 128 | deposition of extracellular matrix                         | 1.68E-03 | 3            |
| 129 | growth of brain cells                                      | 1.68E-03 | 3            |
| 130 | morphology of bone                                         | 1.70E-03 | 4            |
| 131 | vascularization of organ                                   | 1.74E-03 | 5            |
| 132 | expression of protein                                      | 1.79E-03 | 10           |
| 133 | invasion of cells                                          | 1.82E-03 | 23           |
| 134 | Ehlers-Danlos syndrome, type I                             | 1.88E-03 | 2            |
| 135 | G2/M phase transition of brain cancer cell lines           | 1.88E-03 | 2            |
| 136 | activation of chondrocytes                                 | 1.88E-03 | 2            |
| 137 | adhesion of hOB cells                                      | 1.88E-03 | 2            |
| 138 | arrest in G2/M phase transition of brain cancer cell lines | 1.88E-03 | 2            |
| 139 | morphology of fibrils                                      | 1.88E-03 | 2            |
| 140 | neovascularization of skin                                 | 1.88E-03 | 2            |
| 141 | regeneration of vessel                                     | 1.88E-03 | 2            |
| 142 | tensile strength of skin                                   | 1.88E-03 | 2            |
| 143 | vascularization of malignant tumor                         | 1.88E-03 | 2            |
| 144 | formation of blood vessel                                  | 1.90E-03 | 6            |
| 145 | transcription                                              | 1.93E-03 | 65           |
| 146 | metabolism of protein                                      | 1.93E-03 | 29           |
| 147 | proliferation of eukaryotic cells                          | 1.95E-03 | 66           |
| 148 | attachment of eukaryotic cells                             | 1.95E-03 | 8            |
| 149 | neurological disorder                                      | 1.99E-03 | 62           |
| 150 | Budd-Chiari syndrome                                       | 2.04E-03 | 4            |
| 151 | decidualization                                            | 2.04E-03 | 4            |
| 152 | transcription of estrogen response element                 | 2.04E-03 | 4            |
| 153 | migration of breast cancer cell lines                      | 2.09E-03 | 8            |
| 154 | migration of cells                                         | 2.17E-03 | 46           |
| 155 | dilation of heart chamber                                  | 2.24E-03 | 5            |
| 156 | movement of breast cancer cell lines                       | 2.25E-03 | 8            |
| 157 | entry into cell division process of cancer cells           | 2.27E-03 | 3            |
| 158 | infiltration of blood cells                                | 2.28E-03 | 15           |
| 159 | binding of cell lines                                      | 2.39E-03 | 17           |
| 160 | interphase of cancer cells                                 | 2.42E-03 | 4            |
| 161 | size of testis                                             | 2.42E-03 | 4            |
| 162 | invasion of fibroblast cell lines                          | 2.52E-03 | 5            |
| 163 | cell movement of phagocytes                                | 2.71E-03 | 16           |
| 164 | movement of cells                                          | 2.77E-03 | 46           |
| 165 | healing of wound                                           | 2.78E-03 | 6            |
| 166 | cell movement of blood cells                               | 2.78E-03 | 23           |
| 167 | age-related macular degeneration                           | 2.85E-03 | 4            |
| 168 | cleavage of protein fragment                               | 2.85E-03 | 4            |

|     | A                                               | B        | C            |
|-----|-------------------------------------------------|----------|--------------|
| 1   | Function Annotation*                            | P-value† | # Molecules‡ |
| 169 | formation of vascular lesion                    | 2.85E-03 | 4            |
| 170 | regeneration of cells                           | 2.85E-03 | 4            |
| 171 | infiltration of neutrophils                     | 2.93E-03 | 8            |
| 172 | cardiovascular disorder of mice                 | 2.94E-03 | 14           |
| 173 | Ehlers-Danlos syndrome                          | 2.96E-03 | 3            |
| 174 | attachment of fibroblasts                       | 2.96E-03 | 3            |
| 175 | cell division process of sarcoma cells          | 2.96E-03 | 3            |
| 176 | degradation of extracellular matrix             | 2.96E-03 | 3            |
| 177 | entry into cell division process of tumor cells | 2.96E-03 | 3            |
| 178 | growth of fibrosarcoma cell lines               | 2.96E-03 | 3            |
| 179 | cell division process of cancer cells           | 3.17E-03 | 5            |
| 180 | pancreatic adenocarcinoma                       | 3.17E-03 | 5            |
| 181 | serous ovarian carcinoma                        | 3.18E-03 | 9            |
| 182 | cell stage of cancer cells                      | 3.32E-03 | 4            |
| 183 | pancreatic carcinoma                            | 3.50E-03 | 7            |
| 184 | quantity of osteocytes                          | 3.62E-03 | 6            |
| 185 | invasion of cell lines                          | 3.68E-03 | 19           |
| 186 | G2 phase of brain cancer cell lines             | 3.69E-03 | 2            |
| 187 | apoptosis of stromal cells                      | 3.69E-03 | 2            |
| 188 | arrest in G2 phase of brain cancer cell lines   | 3.69E-03 | 2            |
| 189 | arrest in growth of fibrosarcoma cell lines     | 3.69E-03 | 2            |
| 190 | atrophy of kidney                               | 3.69E-03 | 2            |
| 191 | binding of stromal cells                        | 3.69E-03 | 2            |
| 192 | cell death of bone marrow stromal cells         | 3.69E-03 | 2            |
| 193 | cell-cell adhesion of epithelial cell lines     | 3.69E-03 | 2            |
| 194 | developmental process of skull                  | 3.69E-03 | 2            |
| 195 | disease process of hepatocytes                  | 3.69E-03 | 2            |
| 196 | disruption of focal adhesions                   | 3.69E-03 | 2            |
| 197 | fusion of secretory granules                    | 3.69E-03 | 2            |
| 198 | growth of adenoma                               | 3.69E-03 | 2            |
| 199 | interphase of carcinoma cells                   | 3.69E-03 | 2            |
| 200 | migration of leukemia cells                     | 3.69E-03 | 2            |
| 201 | migration of sarcoma cells                      | 3.69E-03 | 2            |
| 202 | morphology of tight junctions                   | 3.69E-03 | 2            |
| 203 | permeability of colon                           | 3.69E-03 | 2            |
| 204 | polycystic liver disease                        | 3.69E-03 | 2            |
| 205 | release of polysaccharide                       | 3.69E-03 | 2            |
| 206 | replication of human herpesvirus 5              | 3.69E-03 | 2            |
| 207 | sensitization of macrophages                    | 3.69E-03 | 2            |
| 208 | transport of UDP-sugar                          | 3.69E-03 | 2            |
| 209 | vascularization of lesion                       | 3.69E-03 | 2            |
| 210 | vascularization of skin                         | 3.69E-03 | 2            |
| 211 | organization of cytoskeleton                    | 3.76E-03 | 9            |
| 212 | attachment of connective tissue cells           | 3.78E-03 | 3            |
| 213 | clearance of lipid                              | 3.78E-03 | 3            |
| 214 | contraction of connective tissue cells          | 3.78E-03 | 3            |
| 215 | development of rib                              | 3.78E-03 | 3            |
| 216 | ophthalmic disorder of eye                      | 3.78E-03 | 3            |
| 217 | shape change of smooth muscle cells             | 3.78E-03 | 3            |
| 218 | skeletal and muscular disorder of rats          | 3.78E-03 | 3            |
| 219 | binding of colorectal cancer cell lines         | 3.85E-03 | 4            |
| 220 | cell-cell adhesion of eukaryotic cells          | 3.85E-03 | 4            |
| 221 | interphase of tumor cells                       | 3.85E-03 | 4            |
| 222 | cardiovascular disorder of rodents              | 3.89E-03 | 15           |
| 223 | cardiovascular process of organ                 | 3.94E-03 | 6            |
| 224 | disease process of liver                        | 4.03E-03 | 7            |

|     | A                                                | B        | C            |
|-----|--------------------------------------------------|----------|--------------|
| 1   | Function Annotation*                             | P-value† | # Molecules‡ |
| 225 | genetic disorder                                 | 4.15E-03 | 68           |
| 226 | attachment of cells                              | 4.26E-03 | 8            |
| 227 | migration of fibroblasts                         | 4.32E-03 | 7            |
| 228 | proliferation of endothelial cells               | 4.34E-03 | 10           |
| 229 | benign tumor                                     | 4.36E-03 | 19           |
| 230 | assembly of extracellular matrix                 | 4.37E-03 | 5            |
| 231 | digestive organ tumor                            | 4.39E-03 | 24           |
| 232 | arthritis of rodents                             | 4.41E-03 | 9            |
| 233 | inflammatory arthropathy of rodents              | 4.41E-03 | 9            |
| 234 | morphology of connective tissue                  | 4.43E-03 | 4            |
| 235 | differentiation of connective tissue cells       | 4.45E-03 | 15           |
| 236 | ovarian cancer                                   | 4.64E-03 | 17           |
| 237 | arrest in cell stage of brain cancer cell lines  | 4.72E-03 | 3            |
| 238 | arrest in interphase of brain cancer cell lines  | 4.72E-03 | 3            |
| 239 | arrest in interphase of cancer cells             | 4.72E-03 | 3            |
| 240 | disease process of eye                           | 4.72E-03 | 3            |
| 241 | proliferation of myoblasts                       | 4.72E-03 | 3            |
| 242 | thrombocytosis                                   | 4.72E-03 | 3            |
| 243 | cell division process of tumor cells             | 4.83E-03 | 5            |
| 244 | proliferation of chondrocytes                    | 4.83E-03 | 5            |
| 245 | movement of fibroblasts                          | 4.95E-03 | 7            |
| 246 | colony formation                                 | 5.03E-03 | 20           |
| 247 | colony formation of cells                        | 5.03E-03 | 20           |
| 248 | developmental process of tumor                   | 5.05E-03 | 14           |
| 249 | branching morphogenesis of tubules               | 5.07E-03 | 4            |
| 250 | cell-cell adhesion of cells                      | 5.07E-03 | 4            |
| 251 | expression of estrogen response element          | 5.07E-03 | 4            |
| 252 | survival of epithelial cells                     | 5.07E-03 | 4            |
| 253 | tubulation of endothelial cells                  | 5.07E-03 | 4            |
| 254 | cell death of muscle cells                       | 5.12E-03 | 11           |
| 255 | transformation of fibroblast cell lines          | 5.23E-03 | 14           |
| 256 | arrest in cell cycle progression                 | 5.25E-03 | 15           |
| 257 | apoptosis of eukaryotic cells                    | 5.32E-03 | 64           |
| 258 | formation of extracellular matrix                | 5.32E-03 | 5            |
| 259 | developmental disorder of animal                 | 5.33E-03 | 11           |
| 260 | arthritis of mammalia                            | 5.42E-03 | 9            |
| 261 | thrombosis                                       | 5.43E-03 | 6            |
| 262 | cardiovascular disorder of mammalia              | 5.59E-03 | 15           |
| 263 | atherosclerotic lesion                           | 5.63E-03 | 7            |
| 264 | cell cycle progression of eukaryotic cells       | 5.66E-03 | 18           |
| 265 | cleft palate syndrome                            | 5.76E-03 | 4            |
| 266 | mean arterial pressure of mice                   | 5.76E-03 | 4            |
| 267 | morphogenesis of tubules                         | 5.76E-03 | 4            |
| 268 | senescence of fibroblasts                        | 5.76E-03 | 4            |
| 269 | size of gonad                                    | 5.76E-03 | 4            |
| 270 | arrest in cell stage of cancer cells             | 5.80E-03 | 3            |
| 271 | cleavage of Gelatin                              | 5.80E-03 | 3            |
| 272 | developmental process of fibrosarcoma cell lines | 5.80E-03 | 3            |
| 273 | branching morphogenesis                          | 5.86E-03 | 6            |
| 274 | autoimmune disease                               | 5.94E-03 | 28           |
| 275 | production of nitric oxide                       | 5.99E-03 | 10           |
| 276 | accumulation of extracellular matrix             | 6.05E-03 | 2            |
| 277 | arrest in growth of brain cancer cell lines      | 6.05E-03 | 2            |
| 278 | assembly of gap junctions                        | 6.05E-03 | 2            |
| 279 | cell division process of melanoma cells          | 6.05E-03 | 2            |
| 280 | cleavage of RNA fragment                         | 6.05E-03 | 2            |

|     | A                                          | B        | C            |
|-----|--------------------------------------------|----------|--------------|
| 1   | Function Annotation*                       | P-value† | # Molecules‡ |
| 281 | degeneration of cerebellum                 | 6.05E-03 | 2            |
| 282 | developmental process of neuroepithelium   | 6.05E-03 | 2            |
| 283 | entry into G1 phase of eukaryotic cells    | 6.05E-03 | 2            |
| 284 | formation of burst-forming erythroid cells | 6.05E-03 | 2            |
| 285 | formation of epoprostenol                  | 6.05E-03 | 2            |
| 286 | induction of nitric oxide                  | 6.05E-03 | 2            |
| 287 | joining of protein                         | 6.05E-03 | 2            |
| 288 | migration of mesenchymal stem cells        | 6.05E-03 | 2            |
| 289 | migration of skin cell lines               | 6.05E-03 | 2            |
| 290 | mobilization of intracellular stores       | 6.05E-03 | 2            |
| 291 | pigmentation of mice                       | 6.05E-03 | 2            |
| 292 | quantity of L-arginine                     | 6.05E-03 | 2            |
| 293 | quantity of lymphoma cell lines            | 6.05E-03 | 2            |
| 294 | quantity of mesenchymal cells              | 6.05E-03 | 2            |
| 295 | sensitization of blood cells               | 6.05E-03 | 2            |
| 296 | sensitization of lymphatic system cells    | 6.05E-03 | 2            |
| 297 | skeletal and muscular process of limb      | 6.05E-03 | 2            |
| 298 | synovial sarcoma                           | 6.05E-03 | 2            |
| 299 | transformation of endocardial cells        | 6.05E-03 | 2            |
| 300 | vascularization of primary tumor           | 6.05E-03 | 2            |
| 301 | arthritis of animal                        | 6.28E-03 | 9            |
| 302 | arthritis of organism                      | 6.28E-03 | 9            |
| 303 | neuropathy                                 | 6.39E-03 | 17           |
| 304 | development of lung                        | 6.39E-03 | 7            |
| 305 | cell stage of tumor cells                  | 6.52E-03 | 4            |
| 306 | senescence of connective tissue cells      | 6.52E-03 | 4            |
| 307 | developmental disorder                     | 6.66E-03 | 34           |
| 308 | growth of eukaryotic cells                 | 6.75E-03 | 46           |
| 309 | senescence of eukaryotic cells             | 6.80E-03 | 7            |
| 310 | rheumatic disease of rodents               | 6.92E-03 | 9            |
| 311 | apoptosis of splenocytes                   | 7.00E-03 | 3            |
| 312 | arrest in interphase of tumor cells        | 7.00E-03 | 3            |
| 313 | removal of lipid                           | 7.00E-03 | 3            |
| 314 | proliferation of epithelial cells          | 7.28E-03 | 13           |
| 315 | quantity of glycosphingolipid              | 7.29E-03 | 6            |
| 316 | Dupuytren contracture                      | 7.34E-03 | 4            |
| 317 | adhesion of epithelial cell lines          | 7.34E-03 | 4            |
| 318 | migration of eukaryotic cells              | 7.36E-03 | 41           |
| 319 | growth of tumor cells                      | 7.76E-03 | 10           |
| 320 | quantity of glycolipid                     | 7.82E-03 | 6            |
| 321 | cell death of cardiomyocytes               | 7.84E-03 | 8            |
| 322 | ossification                               | 7.96E-03 | 9            |
| 323 | migration of connective tissue cells       | 8.13E-03 | 7            |
| 324 | moiety attachment of essential amino acids | 8.22E-03 | 4            |
| 325 | cell death of heart cells                  | 8.26E-03 | 8            |
| 326 | cell death of breast cell lines            | 8.33E-03 | 5            |
| 327 | connective tissue disorder of rodents      | 8.33E-03 | 9            |
| 328 | damage of connective tissue                | 8.35E-03 | 3            |
| 329 | growth of blood vessel                     | 8.35E-03 | 3            |
| 330 | interphase of brain cancer cell lines      | 8.35E-03 | 3            |
| 331 | mucinous ovarian carcinoma                 | 8.35E-03 | 3            |
| 332 | rheumatoid arthritis                       | 8.58E-03 | 19           |
| 333 | movement of connective tissue cells        | 8.62E-03 | 7            |
| 334 | inflammatory disorder of rodents           | 8.64E-03 | 18           |
| 335 | infiltration of granulocytes               | 8.72E-03 | 9            |
| 336 | rheumatic disease of mammalia              | 8.72E-03 | 9            |

|     | A                                                           | B        | C            |
|-----|-------------------------------------------------------------|----------|--------------|
| 1   | Function Annotation*                                        | P-value† | # Molecules‡ |
| 337 | cell movement of leukocytes                                 | 8.87E-03 | 20           |
| 338 | absorption of lipid                                         | 8.92E-03 | 2            |
| 339 | accumulation of hyaluronic acid                             | 8.92E-03 | 2            |
| 340 | arrest in cell division process of endothelial cells        | 8.92E-03 | 2            |
| 341 | attachment of neuroglia                                     | 8.92E-03 | 2            |
| 342 | bronchiolo-alveolar adenocarcinoma                          | 8.92E-03 | 2            |
| 343 | cancer of mammary gland                                     | 8.92E-03 | 2            |
| 344 | catabolism of L-arginine                                    | 8.92E-03 | 2            |
| 345 | cell death of stromal cells                                 | 8.92E-03 | 2            |
| 346 | cell division process of carcinoma cells                    | 8.92E-03 | 2            |
| 347 | cell spreading of brain cancer cell lines                   | 8.92E-03 | 2            |
| 348 | cell spreading of leukemia cell lines                       | 8.92E-03 | 2            |
| 349 | dermatological disorder of epidermis                        | 8.92E-03 | 2            |
| 350 | formation of artery                                         | 8.92E-03 | 2            |
| 351 | formation of bodily fluid                                   | 8.92E-03 | 2            |
| 352 | formation of collagen fibrils                               | 8.92E-03 | 2            |
| 353 | healing of organ                                            | 8.92E-03 | 2            |
| 354 | lysis of endothelial cell lines                             | 8.92E-03 | 2            |
| 355 | metabolism of D-galactose                                   | 8.92E-03 | 2            |
| 356 | papillary renal cell carcinoma                              | 8.92E-03 | 2            |
| 357 | quantity of glucocorticoid                                  | 8.92E-03 | 2            |
| 358 | quantity of lamellipodia                                    | 8.92E-03 | 2            |
| 359 | release of prostaglandin F2alpha                            | 8.92E-03 | 2            |
| 360 | retraction of cellular protrusions                          | 8.92E-03 | 2            |
| 361 | synthesis of glutamine family amino acid                    | 8.92E-03 | 2            |
| 362 | transition of mesenchymal cells                             | 8.92E-03 | 2            |
| 363 | transport of cystine                                        | 8.92E-03 | 2            |
| 364 | quantity of amino acids                                     | 8.96E-03 | 6            |
| 365 | quantity of sphingolipid                                    | 8.96E-03 | 6            |
| 366 | endocrine system disorder                                   | 9.03E-03 | 24           |
| 367 | movement of eukaryotic cells                                | 9.04E-03 | 41           |
| 368 | reorganization of cytoskeleton                              | 9.12E-03 | 7            |
| 369 | developmental disorder of mice                              | 9.15E-03 | 10           |
| 370 | cell death of embryonic stem cells                          | 9.17E-03 | 4            |
| 371 | incorporation of lipid                                      | 9.17E-03 | 4            |
| 372 | organismal abnormalities of liver                           | 9.17E-03 | 4            |
| 373 | quantity of muscle cells                                    | 9.58E-03 | 6            |
| 374 | growth of cancer cells                                      | 9.59E-03 | 8            |
| 375 | organismal abnormalities of lung                            | 9.81E-03 | 5            |
| 376 | cell stage of brain cancer cell lines                       | 9.83E-03 | 3            |
| 377 | development of pulmonary alveolus                           | 9.83E-03 | 3            |
| 378 | development of retinal cells                                | 9.83E-03 | 3            |
| 379 | development of vertebrae                                    | 9.83E-03 | 3            |
| 380 | import of carbohydrate                                      | 9.83E-03 | 3            |
| 381 | proliferation of cell lines                                 | 9.84E-03 | 38           |
| 382 | progressive motor neuropathy                                | 9.93E-03 | 14           |
| 383 | developmental process of cancer cells                       | 9.96E-03 | 9            |
| 384 | conditioning of mice                                        | 1.02E-02 | 4            |
| 385 | developmental process of retinal cells                      | 1.02E-02 | 4            |
| 386 | cell viability of tumor cell lines                          | 1.04E-02 | 9            |
| 387 | connective tissue disorder of mammalia                      | 1.04E-02 | 9            |
| 388 | arrest in cell division process of breast cancer cell lines | 1.06E-02 | 5            |
| 389 | synthesis of prostaglandin                                  | 1.06E-02 | 5            |
| 390 | migration of muscle cells                                   | 1.08E-02 | 7            |
| 391 | inflammatory disorder of mammalia                           | 1.08E-02 | 18           |
| 392 | infiltration of leukocytes                                  | 1.08E-02 | 12           |



|     | A                                                            | B        | C            |
|-----|--------------------------------------------------------------|----------|--------------|
| 1   | Function Annotation*                                         | P-value† | # Molecules‡ |
| 393 | motor neuron disease                                         | 1.09E-02 | 14           |
| 394 | edema                                                        | 1.09E-02 | 9            |
| 395 | infiltration of myeloid cells                                | 1.09E-02 | 9            |
| 396 | arrest in cell cycle progression of cell lines               | 1.11E-02 | 8            |
| 397 | moiety attachment of L-amino acid                            | 1.11E-02 | 8            |
| 398 | developmental disorder of rodents                            | 1.12E-02 | 10           |
| 399 | accumulation of macrophages                                  | 1.13E-02 | 4            |
| 400 | ossification of bone                                         | 1.13E-02 | 4            |
| 401 | angiogenesis of endothelial cells                            | 1.15E-02 | 3            |
| 402 | arrest in cell division process of brain cancer cell lines   | 1.15E-02 | 3            |
| 403 | arrest in cell stage of tumor cells                          | 1.15E-02 | 3            |
| 404 | cell death of splenocytes                                    | 1.15E-02 | 3            |
| 405 | growth of vessel                                             | 1.15E-02 | 3            |
| 406 | incorporation of fatty acid                                  | 1.15E-02 | 3            |
| 407 | internalization of carbohydrate                              | 1.15E-02 | 3            |
| 408 | migration of stem cells                                      | 1.15E-02 | 3            |
| 409 | neovascularization of retina                                 | 1.15E-02 | 3            |
| 410 | tumorigenesis of melanoma cell lines                         | 1.15E-02 | 3            |
| 411 | ovarian tumor                                                | 1.16E-02 | 12           |
| 412 | chemotaxis of cells                                          | 1.20E-02 | 19           |
| 413 | senescence of cells                                          | 1.20E-02 | 7            |
| 414 | apoptosis of hepatic stellate cells                          | 1.23E-02 | 2            |
| 415 | arrest in G0/G1 phase transition of breast cancer cell lines | 1.23E-02 | 2            |
| 416 | arrest in G1 phase of cancer cells                           | 1.23E-02 | 2            |
| 417 | binding of interferon-stimulated response element            | 1.23E-02 | 2            |
| 418 | bronchopulmonary carcinoma                                   | 1.23E-02 | 2            |
| 419 | cardiovascular process of skin                               | 1.23E-02 | 2            |
| 420 | cell viability of embryonic cells                            | 1.23E-02 | 2            |
| 421 | chemotaxis of fibroblast cell lines                          | 1.23E-02 | 2            |
| 422 | development of enteric nervous system                        | 1.23E-02 | 2            |
| 423 | development of myocardium                                    | 1.23E-02 | 2            |
| 424 | disruption of tight junctions                                | 1.23E-02 | 2            |
| 425 | edema of brain                                               | 1.23E-02 | 2            |
| 426 | entry into S phase of Kaposi's sarcoma cells                 | 1.23E-02 | 2            |
| 427 | growth of Kaposi's sarcoma cells                             | 1.23E-02 | 2            |
| 428 | growth of pituitary cells                                    | 1.23E-02 | 2            |
| 429 | hydrolysis of Gelatin                                        | 1.23E-02 | 2            |
| 430 | proliferation of microvascular endothelial cells             | 1.23E-02 | 2            |
| 431 | quantity of capillary vessel                                 | 1.23E-02 | 2            |
| 432 | repair of wound                                              | 1.23E-02 | 2            |
| 433 | sprouting of endothelial cell lines                          | 1.23E-02 | 2            |
| 434 | thrombocytosis of mammalia                                   | 1.23E-02 | 2            |
| 435 | thrombocytosis of mice                                       | 1.23E-02 | 2            |
| 436 | skeletal and muscular disorder of rodents                    | 1.23E-02 | 11           |
| 437 | development of tubules                                       | 1.25E-02 | 4            |
| 438 | glycolysis                                                   | 1.25E-02 | 4            |
| 439 | skeletal and muscular process of bone                        | 1.25E-02 | 4            |
| 440 | neuroendocrine carcinoma                                     | 1.26E-02 | 7            |
| 441 | infiltration of lymphatic system cells                       | 1.28E-02 | 12           |
| 442 | migration of fibroblast cell lines                           | 1.31E-02 | 6            |
| 443 | activation of tumor cells                                    | 1.32E-02 | 3            |
| 444 | cell division process of endothelial cells                   | 1.32E-02 | 3            |
| 445 | cleft palate syndrome of mice                                | 1.32E-02 | 3            |
| 446 | disease process of melanoma cell lines                       | 1.32E-02 | 3            |
| 447 | edema of mice                                                | 1.32E-02 | 3            |

|     | A                                                              | B        | C            |
|-----|----------------------------------------------------------------|----------|--------------|
| 1   | Function Annotation*                                           | P-value† | # Molecules‡ |
| 448 | growth of central nervous system cells                         | 1.32E-02 | 3            |
| 449 | hydrocephalus of mice                                          | 1.32E-02 | 3            |
| 450 | pulmonary fibrosis of mice                                     | 1.32E-02 | 3            |
| 451 | pulmonary fibrosis of rodents                                  | 1.32E-02 | 3            |
| 452 | experimentally-induced arthritis of mice                       | 1.33E-02 | 5            |
| 453 | proliferation of brain cancer cell lines                       | 1.33E-02 | 5            |
| 454 | accumulation of antigen presenting cells                       | 1.37E-02 | 4            |
| 455 | conditioning of rodents                                        | 1.37E-02 | 4            |
| 456 | ossification of connective tissue                              | 1.37E-02 | 4            |
| 457 | activation of connective tissue cells                          | 1.43E-02 | 5            |
| 458 | respiratory disorder of mammalia                               | 1.46E-02 | 8            |
| 459 | movement of fibroblast cell lines                              | 1.47E-02 | 6            |
| 460 | quantity of tumor                                              | 1.47E-02 | 6            |
| 461 | outgrowth of neurites                                          | 1.48E-02 | 14           |
| 462 | neoplasia of organ                                             | 1.50E-02 | 4            |
| 463 | quantity of stem cells                                         | 1.50E-02 | 4            |
| 464 | synthesis of acylglycerol                                      | 1.50E-02 | 4            |
| 465 | activation of endothelial cells                                | 1.52E-02 | 3            |
| 466 | arrest in cell division process of cancer cells                | 1.52E-02 | 3            |
| 467 | organization of microtubules                                   | 1.52E-02 | 3            |
| 468 | pulmonary fibrosis of animal                                   | 1.52E-02 | 3            |
| 469 | vascularization of retina                                      | 1.52E-02 | 3            |
| 470 | prostate cancer                                                | 1.52E-02 | 16           |
| 471 | outgrowth of plasma membrane projections                       | 1.52E-02 | 14           |
| 472 | quantity of primary tumor                                      | 1.53E-02 | 5            |
| 473 | growth of cell lines                                           | 1.54E-02 | 36           |
| 474 | accumulation of glycosaminoglycan                              | 1.61E-02 | 2            |
| 475 | accumulation of vesicles                                       | 1.61E-02 | 2            |
| 476 | activation of hepatic stellate cells                           | 1.61E-02 | 2            |
| 477 | anorexia of rodents                                            | 1.61E-02 | 2            |
| 478 | binding of Egr-1 binding site                                  | 1.61E-02 | 2            |
| 479 | breakage of blood vessel                                       | 1.61E-02 | 2            |
| 480 | cell division process of unspecified cell lines                | 1.61E-02 | 2            |
| 481 | developmental process of trophoblast                           | 1.61E-02 | 2            |
| 482 | dysfunction of left ventricle                                  | 1.61E-02 | 2            |
| 483 | entry into S phase of cancer cells                             | 1.61E-02 | 2            |
| 484 | formation of aneurysm                                          | 1.61E-02 | 2            |
| 485 | formation of erythroid progenitor cells                        | 1.61E-02 | 2            |
| 486 | formation of prostaglandin                                     | 1.61E-02 | 2            |
| 487 | gap junctional intercellular communication of eukaryotic cells | 1.61E-02 | 2            |
| 488 | glycolysis of cells                                            | 1.61E-02 | 2            |
| 489 | growth of benign tumor                                         | 1.61E-02 | 2            |
| 490 | metabolism of L-arginine                                       | 1.61E-02 | 2            |
| 491 | migration of neuroblasts                                       | 1.61E-02 | 2            |
| 492 | modification of wound                                          | 1.61E-02 | 2            |
| 493 | morphology of artery                                           | 1.61E-02 | 2            |
| 494 | neovascularization of tumor                                    | 1.61E-02 | 2            |
| 495 | neurological process of hindlimb                               | 1.61E-02 | 2            |
| 496 | recruitment of osteoclasts                                     | 1.61E-02 | 2            |
| 497 | sprouting of cell lines                                        | 1.61E-02 | 2            |
| 498 | stress response of cells                                       | 1.61E-02 | 2            |
| 499 | survival of epidermal cells                                    | 1.61E-02 | 2            |
| 500 | synthesis of monosaccharide                                    | 1.61E-02 | 2            |
| 501 | thickening of epidermis                                        | 1.61E-02 | 2            |
