# Supplementary material
Source: PubMed Central journal article supplement (PMC6314014)
Supplement: NIHMS999248-supplement-Supp_Table_6.pdf [file NIHMS999248-supplement-Supp_Table_6.pdf]

Supplemental Table 6. Biological functions of mammary tumor transcripts that might later serve as biomarkers of human breast cancer metastasis risk. The gene expression data from individual mammary tumor samples were ordered such that 25% (33 samples) of the total samples came from mice with no surface- or section- metastatic lesions and the longest tumor onset. Gene expression data from these 33 samples served as the reference group when paired with the gene expression data of 33 mammary tumor samples from mice that had the most sectional metastatic lesions detected (AMD66), and when paired with the gene expression data of 33 mammary tumor samples from mice that had the most superficial metastatic lesions detected (MET66). The differential expression of genes ( $Q < 0.05$ ) common to both the AMD66 and MET66 analyses was further restricted to genes expressed in human adipose or breast to define the set of metastasis virulence biomarkers.

\*categories of biological functions as defined by Ingenuity Pathway Analysis Knowledge Base

†P-value describing the probability that the molecules of the biomarker list associate with a biological function category due to chance

‡Number of molecules associated with function

|    | A                                                        | B        | C            |
|----|----------------------------------------------------------|----------|--------------|
| 1  | Function Annotation*                                     | P-value† | # Molecules‡ |
| 2  | experimentally-induced diabetes                          | 3.66E-08 | 9            |
| 3  | diabetes                                                 | 1.54E-07 | 15           |
| 4  | atherosclerosis                                          | 6.62E-07 | 10           |
| 5  | developmental process of bone                            | 1.33E-06 | 11           |
| 6  | metabolic disorder                                       | 2.43E-06 | 23           |
| 7  | hematological disorder                                   | 2.67E-06 | 22           |
| 8  | respiratory disorder                                     | 3.8E-06  | 17           |
| 9  | development of bone                                      | 4.09E-06 | 8            |
| 10 | systemic sclerosis                                       | 6.1E-06  | 5            |
| 11 | developmental process of connective tissue               | 6.65E-06 | 11           |
| 12 | death of animal                                          | 8.42E-06 | 23           |
| 13 | cardiovascular disorder                                  | 1.08E-05 | 20           |
| 14 | death of mice                                            | 1.28E-05 | 22           |
| 15 | genetic disorder                                         | 1.55E-05 | 34           |
| 16 | release of nitric oxide                                  | 0.000016 | 6            |
| 17 | migration of endothelial cells                           | 1.63E-05 | 9            |
| 18 | endocrine system disorder                                | 1.65E-05 | 16           |
| 19 | death of rodents                                         | 1.73E-05 | 22           |
| 20 | angiogenesis of blood vessel                             | 1.95E-05 | 9            |
| 21 | vascular lesion                                          | 2.05E-05 | 7            |
| 22 | death of mammalia                                        | 2.09E-05 | 22           |
| 23 | cardiovascular process of blood vessel                   | 3.06E-05 | 10           |
| 24 | development of connective tissue                         | 3.32E-05 | 8            |
| 25 | formation of vascular lesion                             | 4.23E-05 | 4            |
| 26 | neovascularization of eye                                | 4.53E-05 | 3            |
| 27 | skeletal and muscular disorder                           | 4.68E-05 | 21           |
| 28 | angiogenesis                                             | 0.000047 | 11           |
| 29 | inflammatory disorder                                    | 5.38E-05 | 25           |
| 30 | connective tissue disorder                               | 6.33E-05 | 18           |
| 31 | aneurysm                                                 | 6.43E-05 | 3            |
| 32 | contraction of fibroblasts                               | 6.43E-05 | 3            |
| 33 | vascularization of eye                                   | 6.43E-05 | 3            |
| 34 | deposition of granulation tissue                         | 6.85E-05 | 2            |
| 35 | formation of cord blood                                  | 6.85E-05 | 2            |
| 36 | morphology of collagen fibrils                           | 6.85E-05 | 2            |
| 37 | nonproliferative diabetic retinopathy with macular edema | 6.85E-05 | 2            |
| 38 | quantity of cobblestone area-forming cells               | 6.85E-05 | 2            |
| 39 | development of blood vessel                              | 8.97E-05 | 12           |
| 40 | development of vessel                                    | 9.41E-05 | 12           |
| 41 | neovascularization                                       | 9.55E-05 | 6            |
| 42 | formation of filaments                                   | 9.89E-05 | 10           |
| 43 | dermatological disorder                                  | 0.000108 | 15           |
| 44 | migration of breast cancer cell lines                    | 0.000108 | 6            |
| 45 | movement of breast cancer cell lines                     | 0.000115 | 6            |
| 46 | immunological disorder                                   | 0.000126 | 20           |
| 47 | contraction of connective tissue cells                   | 0.000151 | 3            |
| 48 | neovascularization of organ                              | 0.000151 | 3            |
| 49 | migration of tumor cells                                 | 0.000187 | 5            |
| 50 | movement of tumor cells                                  | 0.000201 | 5            |
| 51 | activation of chondrocytes                               | 0.000204 | 2            |
| 52 | adhesion of hOB cells                                    | 0.000204 | 2            |
| 53 | morphology of fibrils                                    | 0.000204 | 2            |
| 54 | renal and urological disorder                            | 0.000209 | 11           |
| 55 | developmental process of tissue                          | 0.000229 | 18           |
| 56 | formation of actin filaments                             | 0.000234 | 8            |
| 57 | neurological disorder                                    | 0.000275 | 28           |

|     | A                                                    | B        | C            |
|-----|------------------------------------------------------|----------|--------------|
| 1   | Function Annotation*                                 | P-value† | # Molecules‡ |
| 58  | formation of actin stress fibers                     | 0.000307 | 7            |
| 59  | quantity of muscle cells                             | 0.000326 | 5            |
| 60  | developmental process of endothelial cells           | 0.000337 | 6            |
| 61  | invasion of eukaryotic cells                         | 0.00034  | 12           |
| 62  | infiltration of eukaryotic cells                     | 0.00036  | 9            |
| 63  | growth of tumor                                      | 0.000372 | 7            |
| 64  | disruption of focal adhesions                        | 0.000407 | 2            |
| 65  | fusion of secretory granules                         | 0.000407 | 2            |
| 66  | release of polysaccharide                            | 0.000407 | 2            |
| 67  | replication of human herpesvirus 5                   | 0.000407 | 2            |
| 68  | vascularization of lesion                            | 0.000407 | 2            |
| 69  | migration of microvascular endothelial cells         | 0.000417 | 3            |
| 70  | migration of stem cells                              | 0.000492 | 3            |
| 71  | infiltration of cells                                | 0.000497 | 9            |
| 72  | invasion of cells                                    | 0.000504 | 12           |
| 73  | cell division process of endothelial cells           | 0.000575 | 3            |
| 74  | choroidal neovascularization                         | 0.000575 | 3            |
| 75  | hydrocephalus of mice                                | 0.000575 | 3            |
| 76  | heart failure                                        | 0.000581 | 6            |
| 77  | migration of cancer cells                            | 0.000613 | 4            |
| 78  | apoptosis of epithelial cells                        | 0.000636 | 7            |
| 79  | genital tumor                                        | 0.000637 | 11           |
| 80  | movement of cancer cells                             | 0.000664 | 4            |
| 81  | acinar-cell carcinoma                                | 0.000667 | 3            |
| 82  | morphology of bone                                   | 0.000667 | 3            |
| 83  | cell death of cell lines                             | 0.000668 | 25           |
| 84  | entry into G1 phase of eukaryotic cells              | 0.000674 | 2            |
| 85  | formation of epoprostenol                            | 0.000674 | 2            |
| 86  | joining of protein                                   | 0.000674 | 2            |
| 87  | migration of mesenchymal stem cells                  | 0.000674 | 2            |
| 88  | migration of skin cell lines                         | 0.000674 | 2            |
| 89  | mobilization of intracellular stores                 | 0.000674 | 2            |
| 90  | synovial sarcoma                                     | 0.000674 | 2            |
| 91  | transformation of endocardial cells                  | 0.000674 | 2            |
| 92  | developmental disorder of animal                     | 0.000681 | 7            |
| 93  | atherosclerotic lesion                               | 0.000701 | 5            |
| 94  | aggregation of fibroblast cell lines                 | 0.000768 | 3            |
| 95  | hydrocephalus                                        | 0.000768 | 3            |
| 96  | cell movement of cells                               | 0.000768 | 18           |
| 97  | development of lung                                  | 0.000779 | 5            |
| 98  | cardiovascular disorder of mice                      | 0.000824 | 8            |
| 99  | proliferation of muscle cells                        | 0.000829 | 7            |
| 100 | neoplasia                                            | 0.000842 | 35           |
| 101 | morphology of blood vessel                           | 0.000877 | 3            |
| 102 | neovascularization of cornea                         | 0.000877 | 3            |
| 103 | release of granules                                  | 0.000877 | 3            |
| 104 | cell death of epithelial cells                       | 0.000941 | 7            |
| 105 | acute allergic pulmonary eosinophilia                | 0.000997 | 3            |
| 106 | fibrosarcoma                                         | 0.000997 | 3            |
| 107 | quantity of tumor cells                              | 0.000997 | 3            |
| 108 | arrest in cell division process of endothelial cells | 0.00101  | 2            |
| 109 | cell spreading of brain cancer cell lines            | 0.00101  | 2            |
| 110 | formation of bodily fluid                            | 0.00101  | 2            |
| 111 | formation of collagen fibrils                        | 0.00101  | 2            |
| 112 | lysis of endothelial cell lines                      | 0.00101  | 2            |
| 113 | papillary renal cell carcinoma                       | 0.00101  | 2            |

|     | A                                                              | B        | C            |
|-----|----------------------------------------------------------------|----------|--------------|
| 1   | Function Annotation*                                           | P-value† | # Molecules‡ |
| 114 | quantity of glucocorticoid                                     | 0.00101  | 2            |
| 115 | quantity of lamellipodia                                       | 0.00101  | 2            |
| 116 | transition of mesenchymal cells                                | 0.00101  | 2            |
| 117 | transport of cystine                                           | 0.00101  | 2            |
| 118 | cell movement                                                  | 0.00108  | 18           |
| 119 | development of endothelial cell lines                          | 0.00113  | 3            |
| 120 | morphology of vessel                                           | 0.00113  | 3            |
| 121 | binding of cell lines                                          | 0.00113  | 9            |
| 122 | vascularization                                                | 0.00114  | 6            |
| 123 | cell death                                                     | 0.00118  | 36           |
| 124 | proliferation of brain cancer cell lines                       | 0.00119  | 4            |
| 125 | binding of tumor cell lines                                    | 0.0012   | 7            |
| 126 | survival of mice                                               | 0.00121  | 10           |
| 127 | developmental process of tumor                                 | 0.00122  | 8            |
| 128 | adenocarcinoma                                                 | 0.00138  | 8            |
| 129 | benign tumor                                                   | 0.00139  | 10           |
| 130 | Kawasaki's disease                                             | 0.0014   | 2            |
| 131 | arrest in G0/G1 phase transition of breast cancer cell lines   | 0.0014   | 2            |
| 132 | growth of pituitary cells                                      | 0.0014   | 2            |
| 133 | proliferation of microvascular endothelial cells               | 0.0014   | 2            |
| 134 | dilation of left ventricle                                     | 0.00141  | 3            |
| 135 | morphology of connective tissue                                | 0.00141  | 3            |
| 136 | vascularization of cornea                                      | 0.00141  | 3            |
| 137 | rheumatic disease                                              | 0.00142  | 14           |
| 138 | survival of rodents                                            | 0.00145  | 10           |
| 139 | proliferation of endothelial cells                             | 0.00146  | 6            |
| 140 | development of tissue                                          | 0.00146  | 14           |
| 141 | cell death of eukaryotic cells                                 | 0.00146  | 31           |
| 142 | cancer                                                         | 0.00151  | 33           |
| 143 | digestive organ tumor                                          | 0.00153  | 12           |
| 144 | G1 phase of bone cancer cell lines                             | 0.00157  | 3            |
| 145 | tubulation of endothelial cells                                | 0.00157  | 3            |
| 146 | chemotaxis of eukaryotic cells                                 | 0.00162  | 10           |
| 147 | binding of cells                                               | 0.00166  | 12           |
| 148 | formation of focal adhesions                                   | 0.00166  | 5            |
| 149 | proliferation of smooth muscle cells                           | 0.00167  | 6            |
| 150 | cleft palate syndrome                                          | 0.00175  | 3            |
| 151 | proliferation of mesangial cells                               | 0.00175  | 3            |
| 152 | ovarian cancer                                                 | 0.00178  | 9            |
| 153 | assembly of actin filaments                                    | 0.00185  | 4            |
| 154 | binding of Egr-1 binding site                                  | 0.00186  | 2            |
| 155 | choroidal neovascularization of eye                            | 0.00186  | 2            |
| 156 | formation of aneurysm                                          | 0.00186  | 2            |
| 157 | formation of prostaglandin                                     | 0.00186  | 2            |
| 158 | gap junctional intercellular communication of eukaryotic cells | 0.00186  | 2            |
| 159 | glycolysis of cells                                            | 0.00186  | 2            |
| 160 | migration of neuroblasts                                       | 0.00186  | 2            |
| 161 | morphology of artery                                           | 0.00186  | 2            |
| 162 | stress response of cells                                       | 0.00186  | 2            |
| 163 | tumorigenesis                                                  | 0.00189  | 36           |
| 164 | proliferation of glomerular cells                              | 0.00193  | 3            |
| 165 | cardiovascular disorder of rodents                             | 0.00193  | 8            |
| 166 | uterine tumor                                                  | 0.00194  | 7            |
| 167 | survival of mammalia                                           | 0.00199  | 10           |
| 168 | proliferation of cells                                         | 0.00202  | 32           |
| 169 | renal cancer                                                   | 0.00203  | 6            |

|     | A                                                   | B        | C            |
|-----|-----------------------------------------------------|----------|--------------|
| 1   | Function Annotation*                                | P-value† | # Molecules‡ |
| 170 | uterine cancer                                      | 0.00204  | 7            |
| 171 | survival of animal                                  | 0.00206  | 10           |
| 172 | survival of organism                                | 0.00206  | 10           |
| 173 | migration of neurons                                | 0.0021   | 6            |
| 174 | Dupuytren contracture                               | 0.00212  | 3            |
| 175 | hypertension of mice                                | 0.00212  | 3            |
| 176 | cell death of central nervous system cells          | 0.00215  | 7            |
| 177 | contraction of eukaryotic cells                     | 0.00219  | 4            |
| 178 | healing of lesion                                   | 0.00219  | 4            |
| 179 | neuropathy                                          | 0.00222  | 9            |
| 180 | renal-cell carcinoma                                | 0.00222  | 5            |
| 181 | growth of tumor cells                               | 0.00224  | 6            |
| 182 | movement of neurons                                 | 0.00224  | 6            |
| 183 | damage of cartilage tissue                          | 0.00237  | 2            |
| 184 | diabetic retinopathy                                | 0.00237  | 2            |
| 185 | endothelial dysfunction                             | 0.00237  | 2            |
| 186 | replication of cytomegalovirus                      | 0.00237  | 2            |
| 187 | morphology of tissue                                | 0.0024   | 5            |
| 188 | eosinophilia                                        | 0.00245  | 4            |
| 189 | cardiovascular disorder of mammalia                 | 0.00247  | 8            |
| 190 | cell death of cardiomyocytes                        | 0.0025   | 5            |
| 191 | developmental disorder of mice                      | 0.00253  | 6            |
| 192 | homing of eukaryotic cells                          | 0.00254  | 10           |
| 193 | cell death of embryonic stem cells                  | 0.00255  | 3            |
| 194 | cholangiocarcinoma                                  | 0.00255  | 3            |
| 195 | differentiation of endothelial cells                | 0.00255  | 3            |
| 196 | hypoxia of organism                                 | 0.00258  | 4            |
| 197 | cell death of heart cells                           | 0.0026   | 5            |
| 198 | ovarian tumor                                       | 0.00264  | 7            |
| 199 | apoptosis of cell lines                             | 0.00272  | 21           |
| 200 | dilation of heart ventricle                         | 0.00277  | 3            |
| 201 | proliferation of kidney cells                       | 0.00277  | 3            |
| 202 | chemotaxis of cells                                 | 0.00287  | 10           |
| 203 | proliferation of endothelial cell lines             | 0.00287  | 4            |
| 204 | developmental disorder of rodents                   | 0.00293  | 6            |
| 205 | G0/G1 phase transition of breast cancer cell lines  | 0.00295  | 2            |
| 206 | G1/S phase transition of bone cancer cell lines     | 0.00295  | 2            |
| 207 | cell stage of endothelial cells                     | 0.00295  | 2            |
| 208 | deposition of connective tissue                     | 0.00295  | 2            |
| 209 | deposition of extracellular matrix                  | 0.00295  | 2            |
| 210 | development of skull bone                           | 0.00295  | 2            |
| 211 | gap junctional intercellular communication of cells | 0.00295  | 2            |
| 212 | growth of brain cells                               | 0.00295  | 2            |
| 213 | growth of neuroendocrine cells                      | 0.00295  | 2            |
| 214 | growth of skin cancer cell lines                    | 0.00295  | 2            |
| 215 | maturation of blood vessel                          | 0.00295  | 2            |
| 216 | permeability of endothelial tissue                  | 0.00295  | 2            |
| 217 | quantity of cellular protrusions                    | 0.00295  | 2            |
| 218 | quantity of lysophosphatidylcholine                 | 0.00295  | 2            |
| 219 | stimulation of endothelial cells                    | 0.00295  | 2            |
| 220 | transformation of endothelial cells                 | 0.00295  | 2            |
| 221 | ophthalmic disorder                                 | 0.00296  | 9            |
| 222 | apoptosis                                           | 0.00301  | 31           |
| 223 | contraction of cells                                | 0.00302  | 4            |
| 224 | biliary tract tumor                                 | 0.00302  | 3            |
| 225 | ossification of bone                                | 0.00302  | 3            |

|     | A                                               | B        | C            |
|-----|-------------------------------------------------|----------|--------------|
| 1   | Function Annotation*                            | P-value† | # Molecules‡ |
| 226 | proteinuria of mice                             | 0.00302  | 3            |
| 227 | retinopathy                                     | 0.00302  | 3            |
| 228 | vascularization of organ                        | 0.00302  | 3            |
| 229 | binding of eukaryotic cells                     | 0.00307  | 11           |
| 230 | migration of bone marrow cells                  | 0.00312  | 5            |
| 231 | quantity of connective tissue cells             | 0.00312  | 5            |
| 232 | severe acute respiratory syndrome               | 0.00312  | 5            |
| 233 | cell death of lymphatic system cells            | 0.00322  | 10           |
| 234 | movement of bone marrow cells                   | 0.00324  | 5            |
| 235 | interphase of bone cancer cell lines            | 0.00327  | 3            |
| 236 | skeletal and muscular process of bone           | 0.00327  | 3            |
| 237 | gonadal tumor                                   | 0.00345  | 7            |
| 238 | cell death of muscle cells                      | 0.00348  | 6            |
| 239 | biliary tract cancer                            | 0.00354  | 3            |
| 240 | dilation of heart chamber                       | 0.00354  | 3            |
| 241 | ossification of connective tissue               | 0.00354  | 3            |
| 242 | re-entry into cell stage of cells               | 0.00354  | 3            |
| 243 | autoimmune disease                              | 0.00358  | 13           |
| 244 | developmental process of skin cancer cell lines | 0.00359  | 2            |
| 245 | formation of nucleus                            | 0.00359  | 2            |
| 246 | morphology of filaments                         | 0.00359  | 2            |
| 247 | hypoxia                                         | 0.00367  | 4            |
| 248 | quantity of nitric oxide                        | 0.00382  | 3            |
| 249 | quantity of stem cells                          | 0.00382  | 3            |
| 250 | re-entry into cell stage                        | 0.00382  | 3            |
| 251 | migration of fibroblast cell lines              | 0.00384  | 4            |
| 252 | tumor                                           | 0.00386  | 27           |
| 253 | renal tumor                                     | 0.00386  | 5            |
| 254 | migration of cells                              | 0.00395  | 19           |
| 255 | apoptosis of central nervous system cells       | 0.00399  | 5            |
| 256 | migration of eukaryotic cells                   | 0.00401  | 18           |
| 257 | amyotrophic lateral sclerosis                   | 0.00402  | 4            |
| 258 | ossification of tissue                          | 0.00411  | 3            |
| 259 | release of carbohydrate                         | 0.00411  | 3            |
| 260 | coronary artery disease                         | 0.00421  | 4            |
| 261 | movement of fibroblast cell lines               | 0.00421  | 4            |
| 262 | Ehlers-Danlos syndrome                          | 0.00428  | 2            |
| 263 | adrenal cortex carcinoma                        | 0.00428  | 2            |
| 264 | attachment of fibroblasts                       | 0.00428  | 2            |
| 265 | cell movement of hepatoma cell lines            | 0.00428  | 2            |
| 266 | chronic renal allograft rejection               | 0.00428  | 2            |
| 267 | communication of eukaryotic cells               | 0.00428  | 2            |
| 268 | degradation of tissue                           | 0.00428  | 2            |
| 269 | developmental process of skull bone             | 0.00428  | 2            |
| 270 | formation of atherosclerotic lesion             | 0.00428  | 2            |
| 271 | permeability of epithelial tissue               | 0.00428  | 2            |
| 272 | quantity of essential amino acids               | 0.00428  | 2            |
| 273 | shape change of brain cancer cell lines         | 0.00428  | 2            |
| 274 | thickening of tissue                            | 0.00428  | 2            |
| 275 | von Hippel-Lindau syndrome                      | 0.00428  | 2            |
| 276 | developmental process of tumor cells            | 0.00433  | 6            |
| 277 | chemotaxis                                      | 0.00436  | 10           |
| 278 | invasion of cell lines                          | 0.00438  | 9            |
| 279 | formation of lesion                             | 0.00441  | 4            |
| 280 | formation of benign tumor                       | 0.00442  | 3            |
| 281 | quantity of smooth muscle cells                 | 0.00442  | 3            |

|     | A                                                  | B        | C            |
|-----|----------------------------------------------------|----------|--------------|
| 1   | Function Annotation*                               | P-value† | # Molecules‡ |
| 282 | homing of cells                                    | 0.00443  | 10           |
| 283 | primary tumor                                      | 0.00445  | 25           |
| 284 | movement of cells                                  | 0.00452  | 19           |
| 285 | apoptosis of eukaryotic cells                      | 0.00457  | 26           |
| 286 | movement of eukaryotic cells                       | 0.00458  | 18           |
| 287 | inflammatory disorder of rodents                   | 0.00461  | 9            |
| 288 | maturation of cells                                | 0.00464  | 8            |
| 289 | arrest in G0/G1 phase transition of cell lines     | 0.00474  | 3            |
| 290 | hypertension of rodents                            | 0.00474  | 3            |
| 291 | attachment of connective tissue cells              | 0.00503  | 2            |
| 292 | cell spreading of endothelial cell lines           | 0.00503  | 2            |
| 293 | clear-cell adenocarcinoma                          | 0.00503  | 2            |
| 294 | clearance of lipid                                 | 0.00503  | 2            |
| 295 | development of rib                                 | 0.00503  | 2            |
| 296 | ophthalmic disorder of eye                         | 0.00503  | 2            |
| 297 | proliferation of granulosa cells                   | 0.00503  | 2            |
| 298 | secretion of corticosterone                        | 0.00503  | 2            |
| 299 | skeletal and muscular disorder of rats             | 0.00503  | 2            |
| 300 | hypertension                                       | 0.00505  | 6            |
| 301 | glioblastoma                                       | 0.00507  | 3            |
| 302 | proteinuria of rodents                             | 0.00507  | 3            |
| 303 | size of atherosclerotic lesion                     | 0.00507  | 3            |
| 304 | skeletal and muscular process of connective tissue | 0.00507  | 3            |
| 305 | apoptosis of lymphatic system cells                | 0.00509  | 9            |
| 306 | developmental disorder                             | 0.00514  | 15           |
| 307 | contraction of muscle                              | 0.00518  | 6            |
| 308 | generation of reactive oxygen species              | 0.00524  | 4            |
| 309 | size of lesion                                     | 0.00524  | 4            |
| 310 | malignant tumor                                    | 0.00533  | 24           |
| 311 | inflammatory disorder of mammalia                  | 0.00535  | 9            |
| 312 | arrest in G0 phase of cell lines                   | 0.00542  | 3            |
| 313 | mucoepidermoid carcinoma                           | 0.00542  | 3            |
| 314 | migration of smooth muscle cells                   | 0.00547  | 4            |
| 315 | invasion of tumor cell lines                       | 0.00549  | 8            |
| 316 | infiltration of blood cells                        | 0.0056   | 7            |
| 317 | ossification                                       | 0.00568  | 5            |
| 318 | cell death of stem cells                           | 0.00578  | 3            |
| 319 | migration of leukemia cell lines                   | 0.00578  | 3            |
| 320 | adhesion of bone cell lines                        | 0.00584  | 2            |
| 321 | adrenal cortex tumor                               | 0.00584  | 2            |
| 322 | angiogenesis of endothelial cell lines             | 0.00584  | 2            |
| 323 | apoptosis of mesangial cells                       | 0.00584  | 2            |
| 324 | arrest in interphase of cancer cells               | 0.00584  | 2            |
| 325 | cardiovascular process of endothelial cell lines   | 0.00584  | 2            |
| 326 | cell death of mesangial cells                      | 0.00584  | 2            |
| 327 | disease process of eye                             | 0.00584  | 2            |
| 328 | formation of fibrils                               | 0.00584  | 2            |
| 329 | generation of prostaglandin D2                     | 0.00584  | 2            |
| 330 | growth of endocrine cells                          | 0.00584  | 2            |
| 331 | interphase of breast cell lines                    | 0.00584  | 2            |
| 332 | proliferation of myoblasts                         | 0.00584  | 2            |
| 333 | quantity of lysophospholipids                      | 0.00584  | 2            |
| 334 | thrombocytosis                                     | 0.00584  | 2            |
| 335 | developmental process of muscle                    | 0.00584  | 7            |
| 336 | tumorigenesis of cell lines                        | 0.00586  | 5            |
| 337 | cell death of brain cells                          | 0.00587  | 6            |

|     | A                                                    | B        | C            |
|-----|------------------------------------------------------|----------|--------------|
| 1   | Function Annotation*                                 | P-value† | # Molecules‡ |
| 338 | adhesion of endothelial cells                        | 0.00593  | 4            |
| 339 | growth of cells                                      | 0.00596  | 25           |
| 340 | pancreatic cancer                                    | 0.00601  | 6            |
| 341 | growth of neurites                                   | 0.00612  | 8            |
| 342 | parotid gland tumor                                  | 0.00616  | 3            |
| 343 | salivary gland tumor                                 | 0.00616  | 3            |
| 344 | size of vascular lesion                              | 0.00616  | 3            |
| 345 | colony formation of blood cells                      | 0.00643  | 4            |
| 346 | formation of plasma membrane projections             | 0.00647  | 7            |
| 347 | angiogenesis of cells                                | 0.00655  | 3            |
| 348 | arrest in G0/G1 phase transition of eukaryotic cells | 0.00655  | 3            |
| 349 | initiation of cell division process of cells         | 0.00655  | 3            |
| 350 | developmental process of cancer cells                | 0.0066   | 5            |
| 351 | pancreatic tumor                                     | 0.0066   | 5            |
| 352 | growth of plasma membrane projections                | 0.00668  | 8            |
| 353 | attachment of eukaryotic cells                       | 0.00668  | 4            |
| 354 | healing                                              | 0.00668  | 4            |
| 355 | adrenal gland tumor                                  | 0.0067   | 2            |
| 356 | arrest in cell stage of cancer cells                 | 0.0067   | 2            |
| 357 | cell stage of breast cell lines                      | 0.0067   | 2            |
| 358 | cleavage of Gelatin                                  | 0.0067   | 2            |
| 359 | invasion of blood cells                              | 0.0067   | 2            |
| 360 | proliferation of ovarian cells                       | 0.0067   | 2            |
| 361 | pseudoexfoliation syndrome                           | 0.0067   | 2            |
| 362 | cell stage of bone cancer cell lines                 | 0.00695  | 3            |
| 363 | development of liver                                 | 0.00695  | 3            |
| 364 | oral cancer                                          | 0.00695  | 3            |
| 365 | cell movement of blood cells                         | 0.00698  | 10           |
| 366 | contraction of tissue                                | 0.00709  | 6            |
| 367 | aggregation of cells                                 | 0.00714  | 7            |
| 368 | quantity of cells                                    | 0.00731  | 18           |
| 369 | G0/G1 phase transition of cell lines                 | 0.00737  | 3            |
| 370 | arrest in G0 phase of eukaryotic cells               | 0.00737  | 3            |
| 371 | proteinuria                                          | 0.00737  | 3            |
| 372 | synthesis of nitric oxide                            | 0.00737  | 3            |
| 373 | morphology of cells                                  | 0.00738  | 10           |
| 374 | proliferation of connective tissue cells             | 0.00743  | 7            |
| 375 | reorganization of cytoskeleton                       | 0.00749  | 4            |
| 376 | activation of mesothelial cells                      | 0.00762  | 2            |
| 377 | apoptosis of splenocytes                             | 0.00762  | 2            |
| 378 | arrest in interphase of tumor cells                  | 0.00762  | 2            |
| 379 | cell death of ventricular myocytes                   | 0.00762  | 2            |
| 380 | concentration of hormone                             | 0.00762  | 2            |
| 381 | deterioration of tissue                              | 0.00762  | 2            |
| 382 | generation of nitric oxide                           | 0.00762  | 2            |
| 383 | migration of Schwann cells                           | 0.00762  | 2            |
| 384 | removal of lipid                                     | 0.00762  | 2            |
| 385 | apoptosis of pancreatic cancer cell lines            | 0.00781  | 3            |
| 386 | progressive motor neuropathy                         | 0.00787  | 7            |
| 387 | renal and urological disorder of mice                | 0.00805  | 5            |
| 388 | neoplasia of mice                                    | 0.00807  | 4            |
| 389 | adhesion of breast cancer cell lines                 | 0.00826  | 3            |
| 390 | Ehlers-Danlos syndrome, type II                      | 0.00832  | 1            |
| 391 | G1 phase of microvascular endothelial cells          | 0.00832  | 1            |
| 392 | G2 phase of carcinoma cells                          | 0.00832  | 1            |
| 393 | Schwartz-Jampel syndrome, type 1                     | 0.00832  | 1            |



|     | A                                                                                  | B        | C            |
|-----|------------------------------------------------------------------------------------|----------|--------------|
| 1   | Function Annotation*                                                               | P-value† | # Molecules‡ |
| 394 | Wernicke-Korsakoff syndrome                                                        | 0.00832  | 1            |
| 395 | accumulation of 1-palmitoyl-2-(epoxycyclopentenone)-sn-glycero-3-phosphorylcholine | 0.00832  | 1            |
| 396 | accumulation of 1-palmitoyl-2-(epoxyisoprostane)-sn-glycero-3-phosphorylcholine    | 0.00832  | 1            |
| 397 | accumulation of chondroitin sulfate B                                              | 0.00832  | 1            |
| 398 | accumulation of protein fragment                                                   | 0.00832  | 1            |
| 399 | accumulation of sulfoglucuronosyl paragloboside                                    | 0.00832  | 1            |
| 400 | activation of afferent neurons                                                     | 0.00832  | 1            |
| 401 | activation of astrocytoma cells                                                    | 0.00832  | 1            |
| 402 | activation of atherosclerotic lesion                                               | 0.00832  | 1            |
| 403 | activation of mucosa cells                                                         | 0.00832  | 1            |
| 404 | activation of myoblasts                                                            | 0.00832  | 1            |
| 405 | activation of neural precursor cells                                               | 0.00832  | 1            |
| 406 | activation of prostaglandin E2                                                     | 0.00832  | 1            |
| 407 | aggregation of focal adhesions                                                     | 0.00832  | 1            |
| 408 | aggregation of retinoblastoma cells                                                | 0.00832  | 1            |
| 409 | angiogenesis of embryonic cell lines                                               | 0.00832  | 1            |
| 410 | arrest in G0 phase of fibroblasts                                                  | 0.00832  | 1            |
| 411 | arrest in G0/G1 phase transition of breast cell lines                              | 0.00832  | 1            |
| 412 | arrest in G0/G1 phase transition of epithelial cell lines                          | 0.00832  | 1            |
| 413 | arrest in G1/S phase transition of cancer cells                                    | 0.00832  | 1            |
| 414 | arrest in cell cycle progression of endothelial cells                              | 0.00832  | 1            |
| 415 | arrest in cell cycle progression of germ cell tumor cell lines                     | 0.00832  | 1            |
| 416 | arrest in cell cycle progression of intestinal cell lines                          | 0.00832  | 1            |
| 417 | arrest in cell cycle progression of synovial fibroblasts                           | 0.00832  | 1            |
| 418 | arrest in maturation of pro-B lymphocytes                                          | 0.00832  | 1            |
| 419 | arrest in mid-G1 phase of microvascular endothelial cells                          | 0.00832  | 1            |
| 420 | arrest in sub-G1 phase of mesothelioma cells                                       | 0.00832  | 1            |
| 421 | atherosclerosis of lesion                                                          | 0.00832  | 1            |
| 422 | beta-adrenergic response of heart                                                  | 0.00832  | 1            |
| 423 | binding of Bcl6 binding site                                                       | 0.00832  | 1            |
| 424 | binding of N-box motif                                                             | 0.00832  | 1            |
| 425 | binding of Oct1 binding element                                                    | 0.00832  | 1            |
| 426 | binding of U46619                                                                  | 0.00832  | 1            |
| 427 | binding of bacteriophage                                                           | 0.00832  | 1            |
| 428 | binding of microsomal membrane                                                     | 0.00832  | 1            |
| 429 | binding of peroxisome proliferator response element-like binding site              | 0.00832  | 1            |
| 430 | binding of retinoblastoma cell lines                                               | 0.00832  | 1            |
| 431 | branching of endothelial cells                                                     | 0.00832  | 1            |
| 432 | breakdown of blood-brain barrier                                                   | 0.00832  | 1            |
| 433 | cell cycle progression of colon carcinoma cells                                    | 0.00832  | 1            |
| 434 | cell spreading of peritoneal macrophages                                           | 0.00832  | 1            |
| 435 | cell viability of Schwann cells                                                    | 0.00832  | 1            |
| 436 | chaining behavior of mice                                                          | 0.00832  | 1            |
| 437 | chemorepulsion of sensory axons                                                    | 0.00832  | 1            |
| 438 | circulation of embryonic tissue                                                    | 0.00832  | 1            |
| 439 | closure of cephalic tissue                                                         | 0.00832  | 1            |
| 440 | clustering of kidney cell lines                                                    | 0.00832  | 1            |
| 441 | colon sporadic adenocarcinoma                                                      | 0.00832  | 1            |
| 442 | colony formation of RPE cells                                                      | 0.00832  | 1            |
| 443 | conjugation of protein                                                             | 0.00832  | 1            |
| 444 | coupling of granulosa cells                                                        | 0.00832  | 1            |
| 445 | coupling of neuroblastoma cell lines                                               | 0.00832  | 1            |
| 446 | coupling of proepicardial cells                                                    | 0.00832  | 1            |
| 447 | cystoid macular edema                                                              | 0.00832  | 1            |
| 448 | cytotoxic reaction of colon cancer cell lines                                      | 0.00832  | 1            |

|     | A                                                                   | B        | C            |
|-----|---------------------------------------------------------------------|----------|--------------|
| 1   | Function Annotation*                                                | P-value† | # Molecules‡ |
| 449 | deformation of vertebral column                                     | 0.00832  | 1            |
| 450 | degeneration of intervertebral disc                                 | 0.00832  | 1            |
| 451 | degradation of aneurysm                                             | 0.00832  | 1            |
| 452 | degradation of cartilage matrix                                     | 0.00832  | 1            |
| 453 | degradation of chondroitin sulfate proteoglycan                     | 0.00832  | 1            |
| 454 | delay in G2 phase of colon carcinoma cells                          | 0.00832  | 1            |
| 455 | delay in cell cycle progression of colorectal cancer cell lines     | 0.00832  | 1            |
| 456 | delay in cell division process of colorectal cancer cell lines      | 0.00832  | 1            |
| 457 | delay in expansion of melanoma cell lines                           | 0.00832  | 1            |
| 458 | delay in maturation of phagosomes                                   | 0.00832  | 1            |
| 459 | delivery of spermine                                                | 0.00832  | 1            |
| 460 | depletion of proteoglycan                                           | 0.00832  | 1            |
| 461 | deposition of elastic fibers                                        | 0.00832  | 1            |
| 462 | despair behavior of mice                                            | 0.00832  | 1            |
| 463 | detachment of hematopoietic progenitor cells                        | 0.00832  | 1            |
| 464 | deterioration of basement membrane                                  | 0.00832  | 1            |
| 465 | development of abdomen                                              | 0.00832  | 1            |
| 466 | development of aberrant crypt foci                                  | 0.00832  | 1            |
| 467 | development of intestinal tumor                                     | 0.00832  | 1            |
| 468 | development of ossification zone                                    | 0.00832  | 1            |
| 469 | development of primary ovarian follicle                             | 0.00832  | 1            |
| 470 | development of submandibular gland                                  | 0.00832  | 1            |
| 471 | developmental process of aberrant crypt foci                        | 0.00832  | 1            |
| 472 | differentiation of cobblestone area-forming cells                   | 0.00832  | 1            |
| 473 | differentiation of ectodermal cells                                 | 0.00832  | 1            |
| 474 | differentiation of long-term culture-initiating cells               | 0.00832  | 1            |
| 475 | differentiation of proplatelets                                     | 0.00832  | 1            |
| 476 | dilation of glomerular capsule                                      | 0.00832  | 1            |
| 477 | dilation of proximal convoluted tubule                              | 0.00832  | 1            |
| 478 | dilation of proximal tubule                                         | 0.00832  | 1            |
| 479 | disorganization of tight junctions                                  | 0.00832  | 1            |
| 480 | dysplasia of knee                                                   | 0.00832  | 1            |
| 481 | dyssegmental dysplasia, Silverman-Handmaker type                    | 0.00832  | 1            |
| 482 | edema of muscle                                                     | 0.00832  | 1            |
| 483 | entry into G1 phase of fibroblasts                                  | 0.00832  | 1            |
| 484 | entry into G1/S phase transition of microvascular endothelial cells | 0.00832  | 1            |
| 485 | erythroblastosis of bone marrow                                     | 0.00832  | 1            |
| 486 | erythroblastosis of spleen                                          | 0.00832  | 1            |
| 487 | excitatory postsynaptic potential of pyramidal neurons              | 0.00832  | 1            |
| 488 | exit from cell cycle progression of enterocytes                     | 0.00832  | 1            |
| 489 | exit from mitosis of breast cancer cell lines                       | 0.00832  | 1            |
| 490 | extension of microvascular endothelial cells                        | 0.00832  | 1            |
| 491 | fenestration of capillary vessel                                    | 0.00832  | 1            |
| 492 | force generation of detrusor muscle                                 | 0.00832  | 1            |
| 493 | formation of capillary network                                      | 0.00832  | 1            |
| 494 | formation of colorectal cancer cell lines                           | 0.00832  | 1            |
| 495 | formation of glomeruloid body                                       | 0.00832  | 1            |
| 496 | formation of great vessels                                          | 0.00832  | 1            |
| 497 | formation of vascular channel                                       | 0.00832  | 1            |
| 498 | fragmentation of basement membrane                                  | 0.00832  | 1            |
| 499 | fusion of endoplasmic reticulum                                     | 0.00832  | 1            |
| 500 | gap junctional intercellular communication of kidney cell lines     | 0.00832  | 1            |
| 501 | glomeruloid body                                                    | 0.00832  | 1            |
| 502 |                                                                     |          |              |
